# Supplementary material for: DNA methylation epi-signature is associated with two molecularly and phenotypically distinct clinical subtypes of Phelan-McDermid syndrome
Source: Clin Epigenetics. 2021 Jan 6;13:2. doi: 10.1186/s13148-020-00990-7 (PMC7789817; doi:10.1186/s13148-020-00990-7)
Supplement: Supplementary file 1 — Additional file 1: Table S1. Differentially methylated probes in PHMDS samples compared to controls. For each probe, listed are: methylation % difference, p value, adjusted p value, chromosome and chromosome position, and where available overlapping UCSC Gene name, UCSC gene type and UCSC CpG island. [file 13148_2020_990_MOESM1_ESM.xlsx]

## Sheet: Sheet 1
Probe	Methylation % difference	p value	Adjusted p value	Chromosome	position	UCSC Gene name(s)	UCSC gene type(s)	UCSC CpG island
cg16970323	-14.6107	7.38035e-19	5.54152e-13	20	42697667	TOX2;TOX2;TOX2;TOX2	3'UTR;3'UTR;3'UTR;3'UTR
cg04444212	-12.8088	1.47133e-18	5.54152e-13	2	206561768	NRP2;NRP2;NRP2;NRP2;NRP2;NRP2	Body;Body;Body;Body;Body;Body
cg07224291	-10.7304	2.21747e-17	5.5678e-12	6	133777802	EYA4;EYA4;EYA4	Body;Body;Body
cg23453858	-21.2343	4.74921e-17	8.94353e-12	2	150170491
cg19370817	-19.638	6.62107e-17	9.97485e-12	3	330267	CHL1;CHL1	5'UTR;5'UTR
cg15120413	-15.1309	1.57897e-15	1.86867e-10	5	53753195
cg15922611	-13.6509	1.73653e-15	1.86867e-10	4	114882334	ARSJ	Body
cg12891269	-11.4971	2.98863e-15	2.50137e-10	4	122518813
cg06467317	-13.8783	5.30686e-15	3.99747e-10	4	81283996	C4orf22;C4orf22	Body;Body
cg04017102	-16.1972	7.64368e-15	5.23429e-10	5	111405936
cg06789445	-18.3655	1.94362e-14	1.1262e-09	3	69942668	MITF;MITF;MITF;MITF	Body;Body;Body;Body
cg16330552	-17.1008	5.08098e-14	2.55155e-09	3	44010115
cg09322573	-14.416	6.99852e-14	3.29484e-09	8	28961356	KIF13B	Body
cg13521077	-16.8509	8.34198e-14	3.49096e-09	4	81260418	C4orf22	Body	chr4:81257040-81257270
cg13068284	-11.0476	2.54873e-13	9.14223e-09	9	109953046
cg22819413	-16.6826	3.48472e-13	1.18769e-08	4	122670640
cg18644227	-10.4058	3.62647e-13	1.18769e-08	1	161710013
cg11290351	-17.0269	5.0328e-13	1.41688e-08	4	122919312
cg06484220	-16.8833	4.76535e-13	1.41688e-08	9	89900174
cg00819417	13.0201	5.07866e-13	1.41688e-08	17	29698916	NF1;NF1	Body;Body
cg22243466	-14.204	9.98488e-13	2.59354e-08	4	114066785	ANK2;ANK2;ANK2	Body;Body;Body
cg18336218	11.5274	1.4729e-12	3.36207e-08	1	13857292
cg00012100	-11.3068	1.4449e-12	3.36207e-08	4	83559827	SCD5	Body
cg21644489	-10.9113	1.43162e-12	3.36207e-08	15	63312170
cg06126494	-12.1413	1.6215e-12	3.39282e-08	4	111715333
cg06370132	11.0239	1.79723e-12	3.58979e-08	10	110550070
cg16018314	-13.8276	2.0174e-12	3.61818e-08	6	123100582	FABP7	TSS200
cg12958443	-10.2187	1.96442e-12	3.61818e-08	1	82983491
cg11519583	-12.0335	2.17466e-12	3.72295e-08	19	44293442
cg25311183	11.2388	2.17068e-12	3.72295e-08	21	39860777	ERG;ERG;ERG;ERG;ERG;ERG;ERG;ERG;ERG	Body;Body;Body;Body;Body;Body;5'UTR;5'UTR;Body
cg23380974	11.698	3.06442e-12	5.01809e-08	1	152741627
cg15009232	-11.2286	3.67513e-12	5.53669e-08	1	49085506	AGBL4	Body
cg23024510	-15.9058	4.34598e-12	6.1176e-08	9	91605035	C9orf47;C9orf47;S1PR3	TSS1500;TSS1500;TSS1500	chr9:91606335-91606823
cg06539497	10.95	4.38558e-12	6.1176e-08	7	155755208	LOC389602	TSS200
cg08422645	-13.506	5.15442e-12	6.81166e-08	1	210446261
cg10489702	11.509	5.90012e-12	7.53281e-08	6	3414775	SLC22A23;SLC22A23;SLC22A23;SLC22A23;SLC22A23	5'UTR;5'UTR;Body;Body;Body
cg05453358	25.1674	6.75946e-12	8.20911e-08	8	47529280			chr8:47528989-47529374
cg15397233	-10.2599	6.66872e-12	8.20911e-08	12	67616288
cg27386529	12.5923	7.27765e-12	8.43385e-08	3	47517807	SCAP	TSS1500	chr3:47516997-47517650
cg23721254	-10.8166	7.97914e-12	8.97075e-08	3	70538099
cg04520078	16.7662	8.60273e-12	9.3915e-08	8	43101622			chr8:43101489-43102542
cg04236723	-12.367	9.15957e-12	9.71772e-08	3	39769115
cg27297326	-12.6951	9.55839e-12	9.83705e-08	6	31894990	C2;C2	TSS1500;TSS1500
cg25439374	14.1911	1.01952e-11	9.97362e-08	1	174968015	CACYBP;CACYBP	TSS1500;TSS1500	chr1:174968490-174969624
cg16636110	11.3461	1.00743e-11	9.97362e-08	19	57702479	ZNF264	TSS1500	chr19:57702696-57703425
cg19935923	-11.1781	1.09323e-11	1.02936e-07	13	80145898
cg24489507	-12.1093	1.1658e-11	1.07092e-07	4	61731073
cg03136493	-14.531	1.20394e-11	1.07963e-07	6	166610956
cg21761138	-11.7603	1.63084e-11	1.32092e-07	2	174615221
cg25686513	-10.387	1.58888e-11	1.32092e-07	1	152636262	LCE2D	5'UTR
cg09856074	-14.1989	1.68885e-11	1.35336e-07	14	51853814
cg27326514	14.0838	2.28902e-11	1.74658e-07	8	80527604	STMN2	Body	chr8:80523975-80525765
cg10544486	-12.3413	2.29549e-11	1.74658e-07	11	123059387	CLMP	Body
cg21428990	14.1589	2.41115e-11	1.80378e-07	7	155790277
cg21721340	10.8998	2.56772e-11	1.87784e-07	20	62682309	SOX18	TSS1500	chr20:62679424-62680883
cg26614073	11.2303	2.76611e-11	1.98439e-07	3	47517819	SCAP	TSS1500	chr3:47516997-47517650
cg01362143	-16.1629	3.13445e-11	2.20661e-07	1	248635723	OR2T3	TSS1500
cg24034105	-10.7759	3.2302e-11	2.23229e-07	1	152482580	LCE5A	TSS1500
cg12214451	-13.1635	3.68299e-11	2.49934e-07	4	114900175	ARSJ;ARSJ	1stExon;5'UTR	chr4:114900355-114900810
cg09522426	-10.3826	3.84967e-11	2.56622e-07	2	235437185
cg16330814	10.7126	4.47583e-11	2.82532e-07	7	99517584	TRIM4;TRIM4	TSS1500;TSS1500	chr7:99516602-99517296
cg13959014	-11.1247	4.77766e-11	2.90229e-07	9	89482812
cg06011624	-12.8702	5.00306e-11	2.99098e-07	21	31988171	KRTAP20-1	TSS1500
cg22580670	12.1268	4.99382e-11	2.99098e-07	17	75372357	SEPT9;SEPT9;SEPT9;SEPT9;SEPT9;SEPT9;SEPT9	1stExon;Body;5'UTR;Body;Body;5'UTR;Body	chr17:75368688-75370506
cg22616525	-10.3514	5.33188e-11	3.13775e-07	1	152669985	LCE2A	TSS1500
cg07146298	-12.2407	5.38774e-11	3.14604e-07	8	80533246	STMN2;STMN2	Body;Body
cg12711196	-17.2209	5.48751e-11	3.15538e-07	1	248636087	OR2T3	TSS1500
cg18906971	16.721	5.68718e-11	3.22102e-07	1	152884061	IVL	3'UTR
cg10876135	-16.6787	5.86116e-11	3.27038e-07	1	248815570	OR2T27	TSS1500
cg27230697	-14.516	6.13432e-11	3.37282e-07	11	58673577			chr11:58672851-58673288
cg04085339	11.0462	6.28503e-11	3.40597e-07	1	174967695	CACYBP;CACYBP	TSS1500;TSS1500	chr1:174968490-174969624
cg05204104	-15.3965	8.93227e-11	4.54619e-07	2	235403141	ARL4C;ARL4C	3'UTR;1stExon	chr2:235404502-235406541
cg19251656	-15.4749	9.13546e-11	4.58761e-07	1	100000372
cg24060890	-10.3206	9.68684e-11	4.73816e-07	4	93229269	GRID2	Body	chr4:93226348-93227007
cg15240619	-15.0507	1.01039e-10	4.87879e-07	1	99745267	LPPR4;LPPR4	Body;Body
cg13620119	-10.3577	1.0095e-10	4.87879e-07	7	137505961	DGKI	Body
cg19605110	-10.6053	1.01864e-10	4.88728e-07	3	44100063
cg00056066	17.3135	1.08689e-10	5.14914e-07	10	25010738	ARHGAP21	Body	chr10:25011963-25013816
cg06251978	-10.5585	1.11173e-10	5.23391e-07	1	159507078	OR10J5	TSS1500
cg26772847	-10.178	1.20782e-10	5.46132e-07	15	62589487
cg13153264	-10.4161	1.22826e-10	5.47459e-07	1	152680502	LCE4A	TSS1500
cg25484139	10.1048	1.37259e-10	5.87455e-07	3	13008273	IQSEC1;IQSEC1	Body;Body	chr3:13008648-13009210
cg19229209	-17.0397	1.45962e-10	6.21177e-07	3	99440401	COL8A1;COL8A1;MIR548G	5'UTR;5'UTR;Body
cg26286826	11.1966	1.4819e-10	6.23611e-07	18	65085608
cg27474897	17.4534	1.55922e-10	6.52502e-07	2	199480893
cg11973654	-10.9534	1.72516e-10	7.0451e-07	9	18473018	ADAMTSL1;ADAMTSL1	TSS1500;TSS1500
cg06857094	12.5732	2.22462e-10	8.7294e-07	6	31762442	VARS	Body	chr6:31763240-31763905
cg02692893	-10.035	2.33708e-10	9.02792e-07	3	123708030	ROPN1	5'UTR	chr3:123710680-123711108
cg03408024	-12.9155	2.44485e-10	9.30113e-07	4	147075042
cg24146501	-13.0835	2.54633e-10	9.50912e-07	1	248604048
cg26961260	12.4072	2.60731e-10	9.62742e-07	17	29284138	ADAP2	Body
cg11430197	12.0583	2.64326e-10	9.71258e-07	8	43102008			chr8:43101489-43102542
cg06969055	-16.9573	2.83939e-10	1.03826e-06	10	44893953
cg09895893	-14.3485	2.8605e-10	1.04093e-06	7	107953712	NRCAM;NRCAM;NRCAM;NRCAM	5'UTR;5'UTR;5'UTR;5'UTR
cg14659930	14.69	2.90519e-10	1.0521e-06	3	114128301	ZBTB20;ZBTB20;ZBTB20;ZBTB20;ZBTB20;ZBTB20	5'UTR;5'UTR;5'UTR;5'UTR;5'UTR;5'UTR
cg12946660	19.1764	3.04494e-10	1.08191e-06	19	41771873	HNRNPUL1;HNRNPUL1	Body;5'UTR	chr19:41770013-41771113
cg14618634	-10.5553	3.03045e-10	1.08191e-06	9	89193057
cg07414525	-18.5323	3.47652e-10	1.20073e-06	3	390449	CHL1	Body
cg20347666	-15.1926	3.49095e-10	1.20073e-06	7	137505606	DGKI	Body
cg24533059	-10.1416	3.84872e-10	1.28508e-06	6	137735045
cg12903150	-11.3649	4.56648e-10	1.48908e-06	1	69710069
cg10790672	11.5667	4.84782e-10	1.55391e-06	5	78384465	BHMT2	3'UTR
cg01992936	-12.4602	4.96916e-10	1.58606e-06	2	180727533	ZNF385B	TSS1500	chr2:180725717-180726465
cg12550541	-12.3986	5.22116e-10	1.65946e-06	12	58175385	FAM119B;FAM119B;TSFM	3'UTR;3'UTR;TSS1500
cg11471802	20.6943	5.33244e-10	1.67364e-06	8	47529015			chr8:47528989-47529374
cg05701388	-11.6313	5.32937e-10	1.67364e-06	5	174050920
cg12861622	-11.6915	5.63466e-10	1.75301e-06	8	47761906	BEYLA;BEYLA	Body;Body
cg21187258	-10.9391	5.65513e-10	1.75301e-06	7	83278594	SEMA3E	TSS1500
cg16774946	17.064	6.02088e-10	1.84362e-06	13	24798195	SPATA13;SPATA13	Body;5'UTR
cg25361961	10.2704	6.12533e-10	1.86801e-06	19	58070048			chr19:58070553-58071273
cg02217731	-12.153	6.25395e-10	1.89955e-06	15	93753433
cg01325331	-11.281	6.39137e-10	1.91809e-06	5	82766619	VCAN;VCAN;VCAN;VCAN	TSS1500;TSS1500;TSS1500;TSS1500	chr5:82768387-82769268
cg14170999	16.7613	6.47791e-10	1.93634e-06	17	79380515	BAHCC1	Body	chr17:79380359-79380723
cg07769588	10.1672	6.95955e-10	2.04781e-06	19	10655622	ATG4D	Body	chr19:10654228-10655042
cg01915090	-12.5966	7.60504e-10	2.19487e-06	20	29963834
cg14209781	-12.411	7.64399e-10	2.19769e-06	4	147932916
cg21413173	-13.1901	8.05787e-10	2.29913e-06	1	15271952	KIAA1026;KIAA1026;KIAA1026;KIAA1026;KIAA1026	Body;5'UTR;TSS1500;Body;Body
cg26500033	-11.7225	8.13313e-10	2.31185e-06	6	166585954			chr6:166579973-166583423
cg12423667	11.4298	9.1306e-10	2.49194e-06	16	2287078	DNASE1L2;DNASE1L2	Body;Body	chr16:2286600-2288073
cg05417498	-14.1125	9.21817e-10	2.50676e-06	13	88445300
cg26156699	-10.6804	1.0053e-09	2.67583e-06	18	57417334
cg15605698	-12.4013	1.03341e-09	2.7123e-06	6	167639752
cg18378811	-16.3295	1.14563e-09	2.93947e-06	4	114900050	ARSJ;ARSJ	1stExon;5'UTR	chr4:114900355-114900810
cg24247537	11.4569	1.15208e-09	2.94176e-06	11	457278	PTDSS2	Body	chr11:459088-459345
cg11801086	11.6989	1.16105e-09	2.95465e-06	6	39656197	KIF6;KIF6;KIF6	Body;Body;Body
cg12474394	15.4801	1.18315e-09	2.96089e-06	1	19972628	NBL1;NBL1;MINOS1-NBL1;MINOS1-NBL1;NBL1;NBL1;NBL1;NBL1;NBL1;NBL1	Body;TSS1500;5'UTR;Body;5'UTR;Body;5'UTR;5'UTR;5'UTR;5'UTR	chr1:19970255-19971923
cg22827719	13.1485	1.17559e-09	2.96089e-06	3	169345735	MECOM;MECOM	5'UTR;Body
cg05796981	10.1377	1.18127e-09	2.96089e-06	1	228275734	ARF1;ARF1;ARF1;ARF1	5'UTR;5'UTR;5'UTR;5'UTR
cg03691722	18.2968	1.3184e-09	3.17678e-06	18	7011268	LAMA1	Body	chr18:7011267-7011488
cg25436634	-11.1156	1.36718e-09	3.22837e-06	3	181045270
cg24024528	-11.2671	1.38083e-09	3.25041e-06	12	59478783
cg04457658	-11.8093	1.39308e-09	3.25888e-06	6	37732313
cg14471200	-10.4905	1.45172e-09	3.36471e-06	2	188523855
cg15571561	12.4599	1.46747e-09	3.38666e-06	3	35706161	ARPP-21	5'UTR
cg15073666	13.1646	1.50375e-09	3.43567e-06	7	56551007			chr7:56551488-56551713
cg00479110	-13.1252	1.50514e-09	3.43567e-06	5	111963959	LOC102467214	TSS200
cg17913405	19.0466	1.51521e-09	3.44707e-06	17	25290204			chr17:25289487-25290432
cg09769389	-10.3363	1.53262e-09	3.4565e-06	2	171542247
cg14805728	-13.7841	1.56188e-09	3.49112e-06	6	123100726	FABP7;FABP7	5'UTR;1stExon
cg11821795	-13.0175	1.5564e-09	3.49112e-06	22	47611604			chr22:47608695-47609322
cg22125926	-10.7467	1.63881e-09	3.6201e-06	13	24144682	TNFRSF19	TSS200
cg10819350	10.2472	1.71382e-09	3.76326e-06	19	10655686	ATG4D	Body	chr19:10654228-10655042
cg16743289	10.2073	1.73545e-09	3.77819e-06	1	174968144	CACYBP;CACYBP	TSS1500;TSS1500	chr1:174968490-174969624
cg08306740	12.3734	1.85285e-09	4.02216e-06	12	2903463	FKBP4	TSS1500	chr12:2903389-2905189
cg11297016	-11.7382	1.89699e-09	4.10615e-06	5	167230212	TENM2	Body
cg22704788	-11.2212	2.15325e-09	4.53458e-06	1	203444518	PRELP;PRELP	TSS1500;TSS1500
cg13243410	10.5928	2.16646e-09	4.53641e-06	7	26402831	SNX10;SNX10;SNX10;SNX10;SNX10	TSS1500;Body;Body;Body;Body
cg26460647	-13.124	2.2264e-09	4.57308e-06	4	139772746
cg09517766	-19.5285	2.23564e-09	4.57617e-06	10	44894102
cg20941062	-10.0086	2.25968e-09	4.60038e-06	5	132299811	AFF4	TSS1500	chr5:132298789-132299740
cg21347427	-10.0679	2.38429e-09	4.80214e-06	1	152689710
cg06105699	10.4081	2.45377e-09	4.9158e-06	17	79971436	ASPSCR1	Body
cg19959917	-12.7589	2.47384e-09	4.94285e-06	10	44878373	CXCL12;CXCL12;CXCL12	Body;Body;Body	chr10:44879714-44882391
cg17299007	-12.7458	2.6727e-09	5.22923e-06	1	248814626	OR2T27	TSS1500
cg19683655	13.0596	2.71796e-09	5.24135e-06	10	85440299
cg10186229	-11.1167	2.71433e-09	5.24135e-06	19	53118719	ZNF83;ZNF83;ZNF83;ZNF83;ZNF83;ZNF83;ZNF83;ZNF83;ZNF83;ZNF83;ZNF83;ZNF83	5'UTR;5'UTR;5'UTR;5'UTR;5'UTR;5'UTR;5'UTR;5'UTR;5'UTR;5'UTR;5'UTR;5'UTR
cg04330691	-10.1036	2.69253e-09	5.24135e-06	10	6763996
cg13254852	11.621	2.93422e-09	5.52561e-06	6	170362218
cg18415822	16.0811	3.03125e-09	5.62398e-06	7	155857781			chr7:155856030-155856349
cg00504595	-11.231	3.14639e-09	5.71101e-06	13	24144985	TNFRSF19;TNFRSF19	1stExon;5'UTR
cg00155777	11.0832	3.28784e-09	5.86876e-06	9	89737999
cg12990403	14.4474	3.33375e-09	5.9087e-06	13	100523987	CLYBL;CLYBL;LOC101927437	Body;Body;Body
cg10211745	19.1806	3.43027e-09	6.03101e-06	1	19972150	MINOS1-NBL1;MINOS1-NBL1;NBL1;NBL1;NBL1;NBL1;NBL1;NBL1;NBL1	5'UTR;Body;5'UTR;Body;5'UTR;5'UTR;5'UTR;5'UTR;TSS200	chr1:19970255-19971923
cg20060398	-22.9785	3.56518e-09	6.17363e-06	3	181473901
cg15042332	-13.7997	3.60312e-09	6.21077e-06	6	123100722	FABP7;FABP7	5'UTR;1stExon
cg21825848	-10.4866	3.71506e-09	6.34564e-06	2	164657835
cg25881852	-10.9634	3.74161e-09	6.37652e-06	8	110732777
cg09031776	-12.0092	3.77713e-09	6.39365e-06	10	117735350
cg27412975	-11.6106	3.83782e-09	6.45289e-06	4	122861198	TRPC3	Body
cg21760006	-15.6685	3.85733e-09	6.47125e-06	5	119214672
cg26673377	-16.5493	3.99013e-09	6.53398e-06	6	123182996
cg27618090	-12.2643	3.97272e-09	6.53398e-06	1	13185121	HNRNPCL2	TSS1500
cg22012583	11.6421	4.30496e-09	6.85577e-06	1	150947949	LASS2;LASS2	TSS1500;TSS1500	chr1:150946496-150947950
cg27364650	-10.3731	4.60567e-09	7.16796e-06	3	43899898
cg20067334	15.7171	4.74002e-09	7.34668e-06	7	63387147			chr7:63386608-63386885
cg09951199	-14.0798	5.00656e-09	7.63414e-06	9	91605682	S1PR3;C9orf47;C9orf47	TSS1500;TSS200;TSS200	chr9:91606335-91606823
cg10061609	-16.1025	5.09402e-09	7.73618e-06	8	47846628
cg05374238	-12.2466	5.58068e-09	8.34727e-06	1	57285466	C1orf168	TSS200
cg07853425	-10.8751	5.69284e-09	8.42478e-06	5	134408820
cg24333150	15.3431	5.71872e-09	8.44649e-06	19	43203368			chr19:43202099-43202313
cg09768455	10.6439	5.77628e-09	8.48779e-06	4	39615040	SMIM14	5'UTR
cg26188212	10.9967	5.86676e-09	8.59771e-06	1	228967124
cg16378622	12.3334	5.89852e-09	8.60063e-06	7	15879224
cg23334662	-12.6856	6.60176e-09	9.32997e-06	2	198540518	RFTN2;RFTN2	1stExon;5'UTR
cg19045002	12.76	6.92546e-09	9.67849e-06	17	79380585	BAHCC1	Body	chr17:79380359-79380723
cg27657439	11.1625	7.07089e-09	9.77606e-06	13	110777186
cg23256882	10.7573	7.04216e-09	9.77606e-06	10	33403536
cg03556068	10.6138	7.0991e-09	9.77606e-06	12	27338681
cg24496745	-12.6714	7.32715e-09	9.92677e-06	1	57285156	C1orf168;C1orf168	1stExon;5'UTR
cg03732900	-10.1373	7.2967e-09	9.92677e-06	10	3527996	LOC105376360	Body
cg13626798	-10.2714	7.37308e-09	9.9532e-06	6	132723376	MOXD1	TSS1500	chr6:132722093-132722901
cg14282632	13.6757	7.48327e-09	1.0055e-05	9	71790355	TJP2;TJP2;TJP2;TJP2	5'UTR;Body;Body;Body	chr9:71788715-71789542
cg16032795	-10.8502	7.7508e-09	1.03207e-05	19	31604185
cg21006834	-10.8238	7.7549e-09	1.03207e-05	13	20138813			chr13:20138855-20139323
cg11641006	-10.8727	7.94567e-09	1.05188e-05	2	235213874
cg14251889	15.571	8.17725e-09	1.07686e-05	1	245785119	KIF26B	Body
cg08623193	12.1304	8.31625e-09	1.08756e-05	10	25009527	ARHGAP21	Body	chr10:25011963-25013816
cg03680291	11.6527	8.54061e-09	1.10729e-05	16	47052148			chr16:47047799-47048150
cg16282618	13.1923	8.88645e-09	1.14035e-05	11	129444501
cg06872599	12.4684	9.03124e-09	1.14914e-05	22	46008424
cg26937637	10.8313	9.20615e-09	1.16745e-05	5	130749792
cg16337165	-13.9772	9.29704e-09	1.17399e-05	6	53915782	MLIP;MLIP	Body;Body
cg04574764	-11.0149	9.35832e-09	1.1768e-05	1	56184657
cg27354323	-18.6446	9.79475e-09	1.20951e-05	4	183481562	TENM3	Body
cg04598670	-14.0674	9.98911e-09	1.22548e-05	7	68697651
cg00640055	-15.5505	1.00644e-08	1.22944e-05	7	11665547	THSD7A	Body
cg21090457	-12.6345	1.00714e-08	1.22944e-05	3	77573709	ROBO2;ROBO2	Body;Body
cg18152558	12.1738	1.0062e-08	1.22944e-05	4	75956216	PARM1	Body
cg14741053	10.8257	1.02645e-08	1.24307e-05	7	5275017
cg14157525	11.3135	1.04348e-08	1.25964e-05	16	58161042	CFAP20	Body	chr16:58162754-58163682
cg00125768	14.9762	1.05309e-08	1.26775e-05	22	46264625			chr22:46262065-46263747
cg15713103	13.4837	1.0593e-08	1.27262e-05	1	933685			chr1:933387-937410
cg05191651	-11.4316	1.09168e-08	1.30528e-05	2	178540201	PDE11A;PDE11A;PDE11A;PDE11A;PDE11A;PDE11A;PDE11A;PDE11A	ExonBnd;ExonBnd;ExonBnd;ExonBnd;Body;Body;Body;Body
cg08498747	13.3632	1.1304e-08	1.33672e-05	17	41747669
cg08620411	-12.0405	1.18277e-08	1.36549e-05	7	83087071	SEMA3E;SEMA3E	Body;Body
cg14114043	10.0228	1.18373e-08	1.36549e-05	6	170531435			chr6:170529588-170530672
cg22206517	14.9151	1.20536e-08	1.38197e-05	6	12232846
cg05668703	13.3816	1.20334e-08	1.38197e-05	17	79380493	BAHCC1	Body	chr17:79380359-79380723
cg04996195	-14.3332	1.22027e-08	1.38863e-05	7	87105398	ABCB4;ABCB4;ABCB4	TSS1500;TSS1500;TSS1500	chr7:87104723-87105305
cg26339943	-10.1562	1.21847e-08	1.38863e-05	4	145571234	HHIP	Body	chr4:145566242-145567413
cg25324235	10.1268	1.26147e-08	1.41612e-05	1	159770168	FCRL6	TSS200
cg08768218	-13.3878	1.27042e-08	1.41772e-05	8	13372483	DLC1;DLC1	TSS200;TSS200
cg10691866	13.4668	1.29305e-08	1.43447e-05	7	65817282	TPST1	Body
cg06681689	-11.8908	1.39724e-08	1.51875e-05	13	88462989	LINC00397	TSS1500
cg09239106	-12.3532	1.42223e-08	1.54146e-05	12	49937997	KCNH3	Body
cg05110013	-14.5718	1.44202e-08	1.54954e-05	3	197091595
cg11258215	-12.4193	1.44107e-08	1.54954e-05	4	77609712	SHROOM3	Body	chr4:77610324-77610943
cg22109795	-13.9676	1.4446e-08	1.55009e-05	1	210468650			chr1:210465709-210466212
cg14390254	-12.4906	1.49536e-08	1.58863e-05	11	48345293	OR4C3	TSS1500
cg06081951	-11.0145	1.49738e-08	1.58863e-05	11	14991413	CALCA;CALCA;CALCA	Body;Body;Body	chr11:14993452-14993661
cg20506071	-10.6875	1.51171e-08	1.59932e-05	2	217985565
cg24310434	-11.9917	1.53147e-08	1.61796e-05	4	82964312			chr4:82965415-82965896
cg27336423	-15.3746	1.57128e-08	1.64616e-05	8	13373647	DLC1;DLC1	TSS1500;TSS1500
cg19276110	-13.6276	1.57999e-08	1.6507e-05	1	20396593	PLA2G5	TSS200
cg08707471	-10.0529	1.61929e-08	1.68475e-05	3	353166	CHL1	5'UTR	chr3:350660-350893
cg15097580	-11.3734	1.66975e-08	1.72957e-05	18	57489327
cg05603281	-11.1882	1.67156e-08	1.72957e-05	3	73674815	PDZRN3-AS1;PDZRN3	Body;TSS1500	chr3:73673230-73674375
cg21764262	-10.2934	1.68332e-08	1.73697e-05	6	41473517			chr6:41472816-41473291
cg19234140	13.9583	1.72061e-08	1.7691e-05	1	19972103	MINOS1-NBL1;MINOS1-NBL1;NBL1;NBL1;NBL1;NBL1;NBL1;NBL1;NBL1	5'UTR;Body;5'UTR;Body;5'UTR;5'UTR;5'UTR;5'UTR;TSS200	chr1:19970255-19971923
cg24690588	-11.6201	1.7215e-08	1.7691e-05	1	57285399	C1orf168	TSS200
cg26149875	17.0566	1.80319e-08	1.84049e-05	6	26225282	HIST1H3E	TSS200	chr6:26225386-26225790
cg08286051	-14.0609	1.83766e-08	1.86305e-05	8	13102733	DLC1	Body
cg20075675	-10.779	1.89532e-08	1.89599e-05	12	106458455	NUAK1	3'UTR	chr12:106460673-106460892
cg26766885	-16.7631	1.92619e-08	1.92177e-05	7	96220185
cg03989273	13.8143	1.94537e-08	1.92559e-05	5	133468435	TCF7;TCF7;TCF7;TCF7;TCF7;TCF7;TCF7	Body;Body;Body;Body;Body;Body;Body
cg06855983	13.4877	1.98648e-08	1.95857e-05	19	13984313	MIR181C;MIR181D	TSS1500;TSS1500	chr19:13984606-13984918
cg03124146	16.7594	1.99681e-08	1.96618e-05	7	63361127			chr7:63361126-63361493
cg10016364	11.5187	2.02909e-08	1.98757e-05	1	159770136
cg17936572	11.2945	2.05863e-08	1.99574e-05	3	35706114	ARPP-21	5'UTR
cg21699330	15.1494	2.08789e-08	2.0086e-05	7	26193032	NFE2L3	Body	chr7:26191794-26192757
cg08790576	-11.9388	2.20799e-08	2.0816e-05	8	47846324
cg00056468	17.8555	2.21746e-08	2.08179e-05	3	88489988
cg06137123	15.9677	2.23282e-08	2.08598e-05	11	129444480
cg25591451	12.9216	2.23278e-08	2.08598e-05	7	99517509	TRIM4;TRIM4	TSS1500;TSS1500	chr7:99516602-99517296
cg09713684	-11.1225	2.35823e-08	2.17426e-05	5	134372398			chr5:134374385-134376751
cg12856550	-13.6674	2.38409e-08	2.18473e-05	11	6348423
cg16281776	-10.8857	2.4096e-08	2.20275e-05	1	203444678	PRELP;PRELP	TSS1500;TSS1500
cg07218647	-12.6278	2.47307e-08	2.24503e-05	2	121338498			chr2:121334308-121334801
cg15886977	10.2774	2.47527e-08	2.24503e-05	6	138726707	HEBP2	Body	chr6:138724617-138726215
cg26916862	14.5974	2.49912e-08	2.25719e-05	7	63361617			chr7:63361126-63361493
cg01675769	-12.5174	2.51674e-08	2.26767e-05	15	80738133	ARNT2	Body
cg14303699	12.2397	2.6149e-08	2.33854e-05	9	2160653	SMARCA2;SMARCA2;SMARCA2;SMARCA2;SMARCA2;SMARCA2;SMARCA2	Body;Body;Body;Body;Body;Body;Body
cg00543073	14.7048	2.73851e-08	2.41832e-05	2	60773386	BCL11A;BCL11A;BCL11A	Body;Body;Body	chr2:60776596-60778157
cg01193368	14.4871	2.80388e-08	2.45645e-05	7	56855195			chr7:56855145-56855500
cg13342668	-10.0788	2.80452e-08	2.45645e-05	1	190448929	LINC01351;LINC01351	Body;Body
cg25467224	10.0206	2.82266e-08	2.4666e-05	22	50218031	BRD1;BRD1	5'UTR;5'UTR	chr22:50217157-50217663
cg17124794	-14.7484	2.95923e-08	2.54752e-05	2	105562481	LOC102724691	Body
cg22220710	18.6644	3.00826e-08	2.58001e-05	18	7011217	LAMA1	Body	chr18:7011267-7011488
cg11498156	-12.6629	3.01182e-08	2.58001e-05	10	102890145	TLX1;TLX1NB	TSS1500;5'UTR	chr10:102891010-102891794
cg22956649	-10.2914	3.04922e-08	2.60122e-05	2	177046513			chr2:177042751-177043444
cg00763170	11.504	3.13583e-08	2.65108e-05	12	33741524
cg23288838	-12.2569	3.26184e-08	2.727e-05	8	23656074
cg06053935	-10.6491	3.28006e-08	2.73314e-05	1	91016772
cg19868495	-10.835	3.31398e-08	2.75178e-05	13	61995249
cg10811045	23.391	3.34999e-08	2.77334e-05	2	91635283			chr2:91634538-91636111
cg13746854	19.4759	3.35447e-08	2.77334e-05	9	34370894	KIAA1161	Body	chr9:34370773-34372902
cg13266323	11.5983	3.3511e-08	2.77334e-05	11	115204072	CADM1;CADM1;CADM1;CADM1;CADM1	Body;Body;Body;Body;Body
cg05866021	-10.1249	3.39776e-08	2.79412e-05	1	57285278	C1orf168;C1orf168	1stExon;5'UTR
cg14273027	-10.4233	3.44421e-08	2.82923e-05	13	70682736	KLHL1;ATXN8OS	TSS200;Body	chr13:70681732-70682219
cg14304787	12.2837	3.55312e-08	2.89972e-05	1	19972777	NBL1;NBL1;MINOS1-NBL1;MINOS1-NBL1;NBL1;NBL1;NBL1;NBL1;NBL1;NBL1	Body;TSS1500;5'UTR;Body;5'UTR;Body;5'UTR;5'UTR;5'UTR;5'UTR	chr1:19970255-19971923
cg13887610	-10.9323	3.60629e-08	2.9241e-05	3	184117342
cg24358395	-11.2755	3.626e-08	2.93692e-05	4	139580260
cg21066736	-10.4418	3.63254e-08	2.93906e-05	1	194435975
cg00249383	10.7875	3.66631e-08	2.95054e-05	16	2287763	DNASE1L2	Body	chr16:2286600-2288073
cg27507960	14.9979	3.70173e-08	2.96953e-05	6	26225246	HIST1H3E	TSS200	chr6:26225386-26225790
cg06062343	-14.7681	3.70842e-08	2.97172e-05	19	31182123
cg03792788	-10.8493	3.75785e-08	2.99858e-05	2	121338607			chr2:121334308-121334801
cg14274644	-10.1764	3.80127e-08	3.02587e-05	11	116603098
cg05189804	-11.7196	3.89669e-08	3.08e-05	11	123065246	ASAM	Body	chr11:123065426-123066184
cg05020137	-10.1875	3.9102e-08	3.0839e-05	2	1629201
cg26794885	-11.3646	3.96598e-08	3.10222e-05	8	12908302
cg02756107	10.8504	4.0243e-08	3.13539e-05	7	99517460	TRIM4;TRIM4	TSS1500;TSS1500	chr7:99516602-99517296
cg11246948	-12.5468	4.04799e-08	3.14485e-05	11	120581281	GRIK4;GRIK4;GRIK4	Body;Body;Body
cg00320094	-12.2247	4.10096e-08	3.16832e-05	1	68695183	GPR177;GPR177	Body;Body	chr1:68696639-68697628
cg24437523	-13.4251	4.12383e-08	3.18077e-05	1	160085568	ATP1A2;ATP1A2	1stExon;5'UTR
cg25106607	11.2471	4.17175e-08	3.20657e-05	9	137193844
cg14438187	-19.243	4.27548e-08	3.26979e-05	2	237582490
cg01327147	17.5028	4.27922e-08	3.26979e-05	9	34371380	KIAA1161	Body	chr9:34370773-34372902
cg05660881	14.8475	4.58793e-08	3.41287e-05	13	24798240	SPATA13;SPATA13	Body;5'UTR
cg00583780	-14.5133	4.5929e-08	3.41287e-05	1	105031120
cg09408902	-10.4751	4.586e-08	3.41287e-05	2	121338544			chr2:121334308-121334801
cg16208053	13.7544	4.60504e-08	3.41419e-05	10	135379215	SYCE1;SYCE1;SYCE1	TSS200;TSS200;5'UTR	chr10:135378883-135379767
cg16032551	-10.1288	4.71318e-08	3.47385e-05	17	47605627	LOC100288866	Body
cg25607216	-15.1414	4.7489e-08	3.49089e-05	11	126976228
cg20932898	-12.1387	4.75539e-08	3.49129e-05	2	14542180
cg10536999	15.1783	4.78355e-08	3.50855e-05	7	26193109	NFE2L3	Body	chr7:26191794-26192757
cg10832281	-10.7914	5.02275e-08	3.64145e-05	11	35499741	PAMR1;PAMR1	Body;Body
cg24158324	-11.7129	5.14827e-08	3.70039e-05	3	55525967			chr3:55520226-55522344
cg19457237	11.8643	5.48705e-08	3.86325e-05	12	34500585			chr12:34500550-34500814
cg12681972	18.6268	5.69586e-08	3.98375e-05	6	26225299	HIST1H3E	TSS200	chr6:26225386-26225790
cg13943133	-11.1245	6.00707e-08	4.13612e-05	9	23537355
cg09435890	10.2507	6.0657e-08	4.16507e-05	16	90144788			chr16:90143683-90144081
cg20724680	15.9348	6.07415e-08	4.16707e-05	19	49000743	LMTK3	Body	chr19:49000561-49001149
cg18751702	12.824	6.12153e-08	4.18144e-05	15	93353951			chr15:93352340-93353082
cg14579430	13.272	6.17128e-08	4.2107e-05	1	19972300	NBL1;NBL1;MINOS1-NBL1;MINOS1-NBL1;NBL1;NBL1;NBL1;NBL1;NBL1;NBL1	5'UTR;1stExon;5'UTR;Body;5'UTR;Body;5'UTR;5'UTR;5'UTR;5'UTR	chr1:19970255-19971923
cg04826488	-13.5519	6.28557e-08	4.27439e-05	8	110378586	PKHD1L1	Body	chr8:110374552-110374793
cg06439640	-12.119	6.31331e-08	4.27662e-05	4	115729210
cg05601456	-10.4113	6.30926e-08	4.27662e-05	4	114900431	ARSJ;ARSJ	1stExon;5'UTR	chr4:114900355-114900810
cg25823085	-12.9185	6.53054e-08	4.39609e-05	7	87105416	ABCB4;ABCB4;ABCB4	TSS1500;TSS1500;TSS1500	chr7:87104723-87105305
cg12816198	12.9456	6.59102e-08	4.421e-05	7	128577593	IRF5;IRF5;IRF5;IRF5;IRF5;IRF5	TSS1500;TSS1500;TSS1500;TSS1500;TSS1500;TSS1500	chr7:128577818-128578756
cg09866743	13.329	6.61215e-08	4.43123e-05	3	35706038	ARPP-21	5'UTR
cg10142520	10.141	6.68487e-08	4.46012e-05	11	65344604	EHBP1L1	Body	chr11:65343329-65343849
cg23888634	10.9156	6.72054e-08	4.46809e-05	11	62312268	AHNAK;AHNAK	5'UTR;5'UTR	chr11:62313282-62314314
cg08640252	15.1141	6.88648e-08	4.5543e-05	16	1820949	NME3	Body	chr16:1820311-1823954
cg25917590	-10.5912	6.93512e-08	4.57052e-05	20	552967
cg13310895	-10.0456	6.94701e-08	4.57052e-05	1	96836517	LOC101928241	Body
cg07059402	13.6334	7.12362e-08	4.64989e-05	22	38244781	MIR659;EIF3L	TSS1500;TSS1500	chr22:38245341-38245681
cg22318959	10.357	7.16265e-08	4.66526e-05	1	159770368	FCRL6;FCRL6	5'UTR;1stExon
cg21636253	10.6072	7.2639e-08	4.71269e-05	22	24685775	SPECC1L;SPECC1L;SPECC1L;SPECC1L-ADORA2A	5'UTR;5'UTR;5'UTR;Body
cg01436624	-10.1911	7.30493e-08	4.73134e-05	6	43674465
cg07945582	11.7915	7.34611e-08	4.74577e-05	7	26206579	NFE2L3	Body
cg16779498	-11.3568	7.34186e-08	4.74577e-05	13	53442030
cg05836043	15.1786	7.36547e-08	4.75013e-05	18	7011388	LAMA1	Body	chr18:7011267-7011488
cg10846300	-13.0958	7.50441e-08	4.81487e-05	19	55314465	KIR2DL4;KIR2DL4;KIR2DL4	TSS1500;TSS1500;TSS1500
cg26376241	12.2076	7.50637e-08	4.81487e-05	2	65594021	SPRED2;SPRED2	TSS200;Body
cg03633574	10.5693	7.54006e-08	4.82964e-05	3	149954846
cg04838249	11.8235	7.73487e-08	4.90438e-05	12	34500640			chr12:34500550-34500814
cg20324199	15.9305	7.87954e-08	4.97518e-05	9	96080326	WNK2	Body	chr9:96080113-96080330
cg16361867	-13.7163	8.11207e-08	5.07099e-05	11	120581355	GRIK4	Body
cg11361636	10.5982	8.3208e-08	5.18426e-05	3	74662850			chr3:74663506-74664121
cg27026786	11.9986	8.36774e-08	5.2006e-05	13	24798133	SPATA13;SPATA13	Body;5'UTR
cg24626597	-10.3183	8.4882e-08	5.2611e-05	11	120446427	GRIK4;GRIK4;GRIK4	5'UTR;5'UTR;5'UTR
cg08822075	17.1094	8.58007e-08	5.30487e-05	7	26193607	NFE2L3	Body	chr7:26191794-26192757
cg16340410	-13.1435	8.71624e-08	5.36847e-05	3	12345716	PPARG;PPARG;PPARG	5'UTR;5'UTR;5'UTR
cg13836098	14.7714	8.77531e-08	5.37178e-05	6	26225268	HIST1H3E	TSS200	chr6:26225386-26225790
cg09644356	-13.4192	8.94636e-08	5.43905e-05	2	121322010
cg25974879	10.3883	9.05276e-08	5.4845e-05	8	12695720
cg20292791	-13.0309	9.12856e-08	5.50538e-05	1	58089357	DAB1	5'UTR
cg18951332	-10.4337	9.20661e-08	5.54336e-05	2	220777552
cg13607218	-11.5551	9.39817e-08	5.60516e-05	2	71118823			chr2:71114733-71115474
cg15874474	-10.3538	9.62562e-08	5.69262e-05	11	35676351
cg12391755	12.3143	9.6536e-08	5.69884e-05	5	176754987
cg06606773	11.7079	9.75978e-08	5.73979e-05	7	63387053			chr7:63386608-63386885
cg03961824	-13.4716	9.90369e-08	5.79651e-05	8	82530967
cg08068845	-10.4719	9.94112e-08	5.80938e-05	2	222890943
cg18132363	12.506	1.00072e-07	5.84187e-05	6	166260572
cg26125366	11.2397	1.00122e-07	5.84187e-05	18	31806577			chr18:31804480-31804875
cg20334079	-16.694	1.00512e-07	5.85554e-05	13	24144544	TNFRSF19	TSS200
cg04749740	-10.2401	1.03283e-07	5.96624e-05	2	65935124
cg09203312	-13.1962	1.03462e-07	5.97197e-05	13	20805196	GJB6;GJB6;GJB6;GJB6;GJB6	5'UTR;5'UTR;5'UTR;5'UTR;1stExon	chr13:20806016-20806867
cg14938587	12.2722	1.04657e-07	6.01895e-05	7	155790392
cg10213821	10.0614	1.04675e-07	6.01895e-05	7	99005134	BUD31;PDAP1	TSS1500;Body	chr7:99005784-99006859
cg19353659	-11.2898	1.06705e-07	6.10306e-05	2	121284055			chr2:121279842-121280183
cg13906701	-11.6617	1.06978e-07	6.1111e-05	6	167705750	UNC93A;UNC93A	Body;Body
cg05260877	-10.6965	1.07288e-07	6.11779e-05	11	102068599	YAP1;YAP1	Body;Body
cg05352118	-10.3703	1.0837e-07	6.1562e-05	3	66623849
cg22732636	-14.7228	1.10019e-07	6.21706e-05	8	13373141	DLC1;DLC1	TSS1500;TSS1500
cg12277846	-11.8389	1.10299e-07	6.22354e-05	18	48033559
cg18611122	10.0598	1.15693e-07	6.4413e-05	1	150947896	LASS2;LASS2	TSS1500;TSS1500	chr1:150946496-150947950
cg23984322	-11.839	1.16912e-07	6.48493e-05	20	30000563	DEFB121;DEFB121	1stExon;5'UTR
cg12487162	-20.8226	1.18107e-07	6.53198e-05	11	12845864	TEAD1	Body
cg15589641	10.7853	1.18258e-07	6.53554e-05	1	19971984	NBL1;NBL1;MINOS1-NBL1;MINOS1-NBL1;NBL1;NBL1;NBL1;NBL1;NBL1;NBL1	TSS1500;1stExon;5'UTR;Body;5'UTR;Body;5'UTR;5'UTR;5'UTR;5'UTR	chr1:19970255-19971923
cg17743555	-12.592	1.19474e-07	6.5786e-05	4	130467434
cg02566812	-11.9774	1.19901e-07	6.59732e-05	8	80454754
cg09096031	-12.3891	1.22253e-07	6.68764e-05	2	198540569	RFTN2;RFTN2	1stExon;5'UTR
cg20591407	11.6475	1.22516e-07	6.69716e-05	12	1642663			chr12:1639033-1640750
cg16170869	13.5825	1.26656e-07	6.86433e-05	16	1821430	NME3;NME3	Body;ExonBnd	chr16:1820311-1823954
cg11357800	14.6977	1.26966e-07	6.87556e-05	15	22509333
cg10379479	-13.3047	1.31938e-07	7.03358e-05	3	123094052	ADCY5;ADCY5	Body;Body
cg04802449	10.5381	1.38611e-07	7.29127e-05	7	157798295	PTPRN2;PTPRN2;PTPRN2;PTPRN2;PTPRN2	Body;Body;Body;Body;Body
cg02784823	17.8141	1.3991e-07	7.34419e-05	19	49000897	LMTK3	Body	chr19:49000561-49001149
cg13784607	10.4274	1.42062e-07	7.43126e-05	11	47546214	CELF1;CELF1	5'UTR;TSS1500
cg07251046	-13.8382	1.46373e-07	7.59872e-05	12	97791023
cg00929798	11.1368	1.51915e-07	7.82175e-05	10	135150139	CALY	5'UTR	chr10:135148196-135150565
cg16001335	13.4391	1.52387e-07	7.8407e-05	22	50219912	BRD1	TSS1500	chr22:50220118-50220822
cg20216726	12.5144	1.5759e-07	8.03702e-05	22	47798027
cg00078456	11.3815	1.60361e-07	8.12233e-05	1	1564422	MIB2;MIB2;MIB2;MIB2;MIB2;MIB2	Body;Body;Body;Body;Body;Body	chr1:1564421-1570006
cg05592245	11.4961	1.61021e-07	8.14035e-05	10	65280473	REEP3	TSS1500	chr10:65280870-65282030
cg21767657	-10.0384	1.61546e-07	8.15596e-05	8	47751623	BEYLA;BEYLA	TSS1500;TSS1500
cg04588745	-10.0365	1.61902e-07	8.16848e-05	1	204898044	NFASC;NFASC;NFASC;NFASC;NFASC	5'UTR;5'UTR;5'UTR;5'UTR;5'UTR
cg17176619	11.77	1.62684e-07	8.19145e-05	13	99218657	STK24	Body
cg25289056	-14.6499	1.64601e-07	8.26037e-05	1	248846394	OR14I1	TSS1500
cg24602714	-12.4657	1.67411e-07	8.35686e-05	1	81106085	LOC101927412;LOC101927412;LOC101927412	TSS1500;Body;Body
cg07318204	-18.837	1.68318e-07	8.37076e-05	4	145566441	HHIP	TSS1500	chr4:145566242-145567413
cg10024280	10.0925	1.6829e-07	8.37076e-05	2	64103578	UGP2;UGP2	Body;Body
cg01397050	-10.2387	1.68764e-07	8.37991e-05	4	116894979
cg13899718	11.582	1.69626e-07	8.39511e-05	1	150947832	LASS2;LASS2	TSS1500;TSS1500	chr1:150946496-150947950
cg08989098	-10.8439	1.70094e-07	8.40723e-05	1	38552637
cg19185846	-10.0803	1.73055e-07	8.4978e-05	2	71123233			chr2:71126720-71129209
cg22570697	-10.8812	1.75004e-07	8.55101e-05	2	236022560
cg07322925	-11.742	1.88435e-07	9.03513e-05	3	39850124	MYRIP;MYRIP;MYRIP;MYRIP;MYRIP	TSS1500;TSS1500;TSS1500;TSS1500;TSS1500	chr3:39851025-39851820
cg07085632	-13.612	1.89033e-07	9.05225e-05	11	125974404
cg12609247	10.1188	1.90071e-07	9.09616e-05	7	130611417
cg21650866	11.146	1.93893e-07	9.22052e-05	8	142297256			chr8:142295218-142295879
cg25256067	-13.3152	1.97265e-07	9.33959e-05	7	11856910	THSD7A	Body
cg16316624	11.7667	1.98321e-07	9.37778e-05	11	61159649	TMEM216	TSS1500	chr11:61159836-61160285
cg25629041	-10.7017	2.00307e-07	9.43617e-05	2	88817360
cg06121226	-11.4011	2.04541e-07	9.58767e-05	4	72134060	SLC4A4;SLC4A4	Body;Body
cg19708055	14.5341	2.07618e-07	9.67769e-05	6	168045556
cg13344095	17.9099	2.10093e-07	9.75086e-05	6	26233352
cg07783094	12.973	2.10563e-07	9.7606e-05	7	157956912	PTPRN2;PTPRN2;PTPRN2	Body;Body;Body	chr7:157956911-157957273
cg11611580	-11.4171	2.15356e-07	9.91886e-05	6	114661277			chr6:114663328-114664859
cg01477861	-10.6479	2.18352e-07	0.00010023	4	77609841	SHROOM3	Body	chr4:77610324-77610943
cg09406615	-12.2268	2.20039e-07	0.000100943	3	165555103	BCHE;BCHE	1stExon;5'UTR
cg02724472	-11.012	2.24554e-07	0.000102452	7	102553293	LRRC17;FBXL13;LRRC17;FBXL13	TSS200;Body;TSS200;Body
cg15536947	-11.3616	2.25141e-07	0.000102534	17	65471303	PITPNC1;PITPNC1	Body;Body
cg10465514	10.8222	2.35178e-07	0.000105889	3	15031948	NR2C2;NR2C2	5'UTR;5'UTR
cg06653052	10.1969	2.35322e-07	0.00010589	19	1275167	C19orf24	TSS1500	chr19:1274469-1276358
cg16386697	12.7315	2.35697e-07	0.000105995	22	51017162	CPT1B;CPT1B;CPT1B;CPT1B;CHKB-CPT1B;CPT1B;CPT1B;CPT1B	TSS200;TSS200;TSS1500;TSS1500;Body;TSS200;TSS200;TSS1500	chr22:51016253-51017020
cg24537687	14.358	2.3902e-07	0.000107086	22	47882912	LL22NC03-75H12.2	TSS200
cg22339775	14.1965	2.40845e-07	0.000107543	6	26224925	HIST1H3E	TSS1500	chr6:26225386-26225790
cg19098932	11.4168	2.42358e-07	0.000107832	1	2345152	PEX10;PEX10	TSS1500;TSS1500	chr1:2345891-2346156
cg26092675	16.8175	2.44044e-07	0.000108217	6	26225258	HIST1H3E	TSS200	chr6:26225386-26225790
cg05820241	-12.9384	2.45545e-07	0.000108273	1	232442534
cg19097322	-10.2127	2.47507e-07	0.000108837	6	123100553	FABP7	TSS200
cg14285533	27.4128	2.49051e-07	0.000109307	7	63386328			chr7:63386608-63386885
cg14736365	-12.366	2.66334e-07	0.000114583	5	173947646
cg21570209	14.4033	2.68587e-07	0.000115215	19	46367987	FOXA3;SYMPK	Body;TSS1500	chr19:46366202-46366605
cg01857597	-10.2294	2.72942e-07	0.000116354	20	2682595	EBF4	Body
cg15016771	-11.4136	2.84896e-07	0.000120225	2	235403218	ARL4C;ARL4C	3'UTR;1stExon	chr2:235404502-235406541
cg16541222	-11.546	2.85879e-07	0.00012037	5	111541635	EPB41L4A	Body
cg18321943	-13.8361	2.86875e-07	0.000120655	13	61990113	PCDH20	TSS1500
cg04685442	-10.605	2.97794e-07	0.000124431	8	49776492
cg18264932	-11.0967	3.02959e-07	0.000125943	7	120414717
cg08717611	-13.7307	3.07797e-07	0.000127322	11	48345708	OR4C3	TSS1500
cg10006428	-11.1607	3.12163e-07	0.000128422	1	248814059	OR2T27	1stExon
cg00933411	-13.8888	3.14763e-07	0.000128987	8	13373090	DLC1;DLC1	TSS1500;TSS1500
cg02257791	-10.4332	3.22102e-07	0.000130656	14	22217085
cg01413354	16.2149	3.28701e-07	0.00013269	9	136017755	RALGDS	Body	chr9:136019708-136020134
cg24790356	-14.431	3.2934e-07	0.000132805	6	97914069
cg05196415	10.1908	3.39776e-07	0.000135634	19	43993544	PHLDB3	Body
cg02374322	-11.0989	3.47404e-07	0.000138312	11	26775295
cg15701111	-11.1475	3.58394e-07	0.000141938	12	52685334	KRT81	TSS200	chr12:52684945-52685222
cg01849085	13.3319	3.64063e-07	0.000143364	7	63505811	ZNF727	TSS200	chr7:63505977-63506298
cg06288727	-12.0629	3.64279e-07	0.000143364	4	172735549	GALNTL6;GALNTL6	5'UTR;ExonBnd	chr4:172733734-172735118
cg13527218	-11.5343	3.72775e-07	0.000146249	2	233384601	PRSS56	TSS1500	chr2:233386614-233389161
cg05688588	12.8016	3.7541e-07	0.000146977	4	25237268	PI4K2B	Body	chr4:25235458-25236246
cg27475875	11.279	3.80089e-07	0.000148039	2	197033138	STK17B	5'UTR	chr2:197035589-197036383
cg16198103	-12.5482	3.89714e-07	0.000150466	8	53471884	FAM150A	Body
cg04547002	-16.7601	3.94999e-07	0.000151961	5	122551801
cg18516067	-13.8345	4.02375e-07	0.000153909	4	98239185
cg25415695	-11.604	4.0434e-07	0.000154338	5	134828036			chr5:134825398-134826496
cg07222505	11.9318	4.23261e-07	0.000159186	5	74161231	FAM169A	5'UTR	chr5:74161536-74162716
cg09767236	14.4987	4.26093e-07	0.000159841	17	8095608			chr17:8092418-8093706
cg18090145	14.9937	4.29314e-07	0.000160889	6	67741714
cg06099975	-11.5008	4.4359e-07	0.000164601	4	134018369	LOC101927359	Body
cg10382206	-11.8064	4.48484e-07	0.000165764	1	209373448
cg19412808	-11.5165	4.50832e-07	0.000166396	1	69916760
cg04624603	13.6127	4.51546e-07	0.000166406	3	35696119	ARPP21;ARPP21;ARPP21	5'UTR;5'UTR;5'UTR
cg05987823	-10.9181	4.57465e-07	0.000167852	12	54428592	HOXC4;HOXC5;HOXC5	5'UTR;Body;3'UTR	chr12:54427025-54428709
cg00203466	13.0916	4.58137e-07	0.000167966	3	149954839	LINC01213	TSS1500
cg09892273	-12.0025	4.59985e-07	0.000168118	12	85307424	SLC6A15;SLC6A15;SLC6A15	TSS1500;TSS1500;TSS1500	chr12:85305663-85305876
cg14474319	-12.5252	4.62672e-07	0.000168936	7	83104863	SEMA3E;SEMA3E	Body;Body
cg00280858	-11.2282	4.74268e-07	0.00017159	7	157809235	PTPRN2;PTPRN2;PTPRN2	Body;Body;Body
cg19871235	-13.0807	4.78493e-07	0.000172869	12	71552569	TSPAN8	TSS1500
cg03774935	10.5219	4.79095e-07	0.000173003	3	3219726	CRBN;CRBN	Body;Body	chr3:3221083-3221617
cg03352287	13.1321	4.80461e-07	0.000173331	1	152488262	CRCT1	3'UTR	chr1:152487978-152488270
cg08110653	13.9257	4.83153e-07	0.000173969	6	68340213
cg02737252	-10.3976	4.85261e-07	0.000174561	11	115933741
cg10364374	-10.1487	4.95155e-07	0.000177442	4	125857940
cg20337215	10.1593	5.07023e-07	0.000180902	16	578931	CAPN15	5'UTR	chr16:576725-577927
cg00106419	-10.6298	5.094e-07	0.000181597	1	248601850
cg05134926	-12.3116	5.18575e-07	0.000183997	18	30349111	KLHL14	Body	chr18:30349690-30352302
cg00366917	11.7286	5.29703e-07	0.000186888	18	74845154	MBP;MBP	TSS1500;TSS1500	chr18:74843360-74845426
cg11245928	11.6934	5.32761e-07	0.000187704	22	38244767	EIF3L;EIF3L;MIR659	TSS1500;TSS1500;TSS1500	chr22:38245341-38245681
cg19196221	13.0222	5.33778e-07	0.000187863	19	56215575			chr19:56215229-56215576
cg20087519	13.4512	5.38226e-07	0.000188783	10	135379242	SYCE1;SYCE1;SYCE1	TSS200;TSS200;5'UTR	chr10:135378883-135379767
cg23120900	11.4395	5.45504e-07	0.000190412	15	59564067	MYO1E	Body
cg01046644	-10.1131	5.49184e-07	0.000191519	9	91605695	S1PR3;C9orf47;C9orf47	TSS1500;TSS200;TSS200	chr9:91606335-91606823
cg18608703	-17.065	5.62736e-07	0.000194802	7	117119195	CFTR	TSS1500
cg12231340	-11.3184	5.75638e-07	0.000198085	12	52685221	KRT81	1stExon	chr12:52684945-52685222
cg06552850	11.4316	5.76287e-07	0.000198218	21	46875414	COL18A1;COL18A1;COL18A1	TSS200;TSS200;Body	chr21:46876168-46876752
cg21096228	11.255	5.78475e-07	0.000198498	15	63228129
cg24298665	-10.0533	6.15462e-07	0.000207152	18	48311081
cg27390669	-10.4769	6.18442e-07	0.000207784	20	24404156
cg16306633	10.5494	6.25879e-07	0.000209721	7	148769220	ZNF786	Body	chr7:148767960-148769190
cg15509177	17.863	6.44557e-07	0.000213886	13	19919208	LOC100101938	TSS200	chr13:19918585-19919221
cg00977403	14.0584	6.70751e-07	0.000220442	16	1585720	IFT140;TMEM204	Body;Body	chr16:1587683-1587899
cg24350296	-12.7466	6.77519e-07	0.000222085	13	24144486	TNFRSF19	TSS1500
cg16117881	-12.1216	6.96403e-07	0.000226602	12	6264282
cg14753334	-10.0746	6.96467e-07	0.000226602	3	73674702	PDZRN3	TSS1500	chr3:73673230-73674375
cg12479444	14.9584	7.12447e-07	0.000229735	7	63361394			chr7:63361126-63361493
cg20260127	13.0593	7.18774e-07	0.000231083	7	56355681			chr7:56355508-56355798
cg00541638	10.2232	7.26123e-07	0.000232552	16	9056115	USP7	Body	chr16:9056372-9056844
cg25225763	-10.3872	7.42663e-07	0.000236143	2	190075588
cg06274109	19.2719	7.56042e-07	0.000239572	22	47798088
cg10274875	11.7179	7.56433e-07	0.000239572	18	57469286
cg04807475	-10.219	7.56675e-07	0.000239572	18	52055569
cg26524748	23.9454	7.67917e-07	0.00024223	2	157621435
cg03957898	-12.3076	7.67712e-07	0.00024223	1	152333423	FLG2	TSS1500
cg21421172	11.6376	7.73067e-07	0.000242939	6	168045888
cg18086868	-10.7864	7.72872e-07	0.000242939	1	220463627
cg03012421	10.3246	7.90682e-07	0.000247339	6	68599408
cg15819924	11.2511	7.974e-07	0.000249027	7	157886456	PTPRN2;PTPRN2;PTPRN2;PTPRN2;PTPRN2	Body;Body;Body;Body;Body
cg03313542	11.6466	8.14508e-07	0.000253472	7	129845597	TMEM209	TSS1500	chr7:129845146-129845424
cg24694702	-10.3432	8.15704e-07	0.000253482	12	119617656	HSPB8	Body
cg14002533	-10.969	8.16812e-07	0.000253568	4	18693594
cg22866825	10.12	8.25554e-07	0.000255026	5	125936419	PHAX	TSS1500	chr5:125936522-125937100
cg05930965	-10.0171	8.28294e-07	0.000255517	2	12938268
cg01751245	12.8848	8.31927e-07	0.000256303	2	65593761	SPRED2;SPRED2;SPRED2	5'UTR;1stExon;Body
cg05722266	11.3789	8.42934e-07	0.000258953	2	96991791	ITPRIPL1;ITPRIPL1;ITPRIPL1;ITPRIPL1	5'UTR;TSS200;TSS200;Body	chr2:96990857-96991283
cg18297027	15.2784	8.46803e-07	0.000259401	9	134585306	RAPGEF1;RAPGEF1;RAPGEF1	TSS200;Body;Body
cg24578493	10.4902	8.49317e-07	0.000259749	22	38244746	EIF3L;EIF3L;MIR659	TSS1500;TSS1500;TSS1500	chr22:38245341-38245681
cg09852697	-11.1287	8.918e-07	0.00026849	1	3616642	TP73;TP73;TP73;TP73	Body;Body;Body;Body
cg13530162	11.1274	8.92989e-07	0.000268633	3	32330506	CMTM8	Body
cg14188441	-11.2011	9.05467e-07	0.00027121	3	241182	CHL1	5'UTR	chr3:238391-240140
cg22715761	-10.0104	9.36185e-07	0.000277636	10	88428147	LDB3;LDB3;LDB3;LDB3;LDB3;LDB3	TSS1500;TSS200;TSS1500;TSS200;TSS1500;TSS1500
cg21924060	10.9226	9.40338e-07	0.000278648	12	6878089	PTMS	Body	chr12:6875481-6876923
cg25757140	15.3048	9.46836e-07	0.000279992	19	38039469			chr19:38039561-38040395
cg21749424	-14.152	9.46481e-07	0.000279992	6	166418799			chr6:166421891-166422241
cg14368661	11.322	9.56908e-07	0.000282116	5	111313948	NREP;NREP;NREP-AS1	TSS1500;TSS1500;Body
cg22978915	-10.6543	9.76317e-07	0.000286046	21	46850449	COL18A1	Body	chr21:46850573-46850841
cg18163452	-11.205	9.80116e-07	0.000287048	1	63466707
cg27570304	14.9203	9.8917e-07	0.000288689	22	50072468
cg10685912	-12.2284	9.95913e-07	0.000290095	16	86809503
cg04351607	-18.6767	1.00981e-06	0.000292786	2	181276670
cg14165272	-10.012	1.0294e-06	0.000296978	5	156252038
cg06572225	-12.6746	1.03531e-06	0.000298301	11	7748353
cg05398967	-10.5925	1.03718e-06	0.000298537	14	62280172			chr14:62279037-62279339
cg19704043	-12.4355	1.03832e-06	0.000298638	7	93116447	CALCR;CALCR;CALCR	5'UTR;Body;5'UTR
cg04307107	-10.3688	1.0493e-06	0.000301219	20	50180603	NFATC2	TSS1500	chr20:50178960-50179675
cg12870827	-12.4968	1.07584e-06	0.000307001	15	71145762	LARP6;LRRC49;LARP6;LARP6;LARP6;LRRC49	Body;1stExon;1stExon;Body;5'UTR;5'UTR	chr15:71145995-71146820
cg27483903	-10.8298	1.08599e-06	0.000309122	12	119618733	HSPB8	Body
cg17917283	11.2071	1.08761e-06	0.000309308	12	1642645			chr12:1639033-1640750
cg16687213	11.5018	1.09106e-06	0.000309786	7	99517476	TRIM4;TRIM4	TSS1500;TSS1500	chr7:99516602-99517296
cg01745599	-13.9322	1.11072e-06	0.000313829	20	122629	DEFB126	TSS1500
cg12296098	-15.7285	1.16462e-06	0.000324531	4	108074656
cg15219491	-10.1065	1.17566e-06	0.000326599	5	77255708			chr5:77253832-77254049
cg20884524	-10.6595	1.18014e-06	0.000327185	6	76108836	FILIP1;FILIP1;FILIP1;LOC101928540	Body;Body;Body;Body
cg26740297	-13.7506	1.23995e-06	0.000338532	2	71166626	ATP6V1B1	Body
cg09245901	-14.3825	1.25477e-06	0.000341638	6	132075947
cg07645761	12.5498	1.32789e-06	0.00035725	16	2892518	TMPRSS8	Body	chr16:2892579-2892810
cg03872677	11.7042	1.33678e-06	0.000358755	6	253022
cg26227310	-10.8016	1.35521e-06	0.000361999	10	102884087	TLX1NB	5'UTR	chr10:102882977-102883551
cg17594256	12.2786	1.37894e-06	0.000366386	13	46014654
cg24280832	14.4546	1.41386e-06	0.000373034	10	77871958	C10orf11	Body	chr10:77872083-77872305
cg04880091	21.4094	1.46894e-06	0.000382609	8	43132451			chr8:43132045-43132478
cg09140241	11.6348	1.49632e-06	0.000388143	13	38069293
cg13287247	-10.1828	1.50745e-06	0.000390208	3	112359534	CCDC80;CCDC80;CCDC80	5'UTR;1stExon;5'UTR
cg19474546	-12.7858	1.51462e-06	0.000391592	14	35999002			chr14:36002598-36005013
cg13352914	-10.4877	1.5299e-06	0.00039453	1	63760405
cg11966998	-13.4139	1.53465e-06	0.000395349	11	15692519
cg20442697	-10.93	1.55575e-06	0.00039969	7	102553432	LRRC17;FBXL13;LRRC17;LRRC17;LRRC17;FBXL13	5'UTR;Body;5'UTR;1stExon;1stExon;Body
cg02109405	10.1927	1.6207e-06	0.00041188	2	91671535			chr2:91669439-91671565
cg16699385	-11.5369	1.62532e-06	0.000412572	6	138427309	PERP	Body	chr6:138428188-138428816
cg12974379	-10.2208	1.62561e-06	0.000412572	3	110788738	PVRL3-AS1	Body	chr3:110790149-110791401
cg19316579	-10.7476	1.64976e-06	0.000416829	10	100843963	HPSE2;HPSE2;HPSE2;HPSE2	Body;Body;Body;Body
cg11781718	10.2247	1.67641e-06	0.00042149	6	26204333	HIST1H4E	TSS1500	chr6:26204764-26205213
cg15587771	-10.8492	1.71089e-06	0.000427731	7	4050875	SDK1	Body
cg06688763	14.2456	1.74472e-06	0.000433313	7	92238207	CDK6;CDK6	3'UTR;3'UTR
cg26092983	-10.9334	1.78631e-06	0.000440303	6	120533307
cg04362853	15.7151	1.81824e-06	0.000445269	19	56151707	ZNF580	TSS1500	chr19:56151516-56152792
cg04990372	12.8032	1.85869e-06	0.000451933	20	47895899	SNORD12B;C20orf199;MIR1259;C20orf199;SNORD12;ZNFX1;C20orf199	TSS1500;Body;TSS1500;Body;TSS1500;TSS1500;Body	chr20:47894197-47895199
cg25694790	10.6827	1.92934e-06	0.000463573	20	17582752	DSTN;DSTN	Body;Body
cg13520102	-10.6197	1.99483e-06	0.000475108	15	88215824
cg17967673	14.3612	2.04428e-06	0.000483785	19	38040009			chr19:38039561-38040395
cg05100067	-10.0678	2.0552e-06	0.000485634	2	2295969	MYT1L	5'UTR
cg02939078	11.7719	2.0729e-06	0.000488944	20	61489595	TCFL5	Body	chr20:61492119-61493626
cg24307243	11.2432	2.09231e-06	0.000492829	2	184360760
cg01743077	-10.9699	2.10404e-06	0.000494971	11	72975586	P2RY6;P2RY6;P2RY6;P2RY6;P2RY6;P2RY6;P2RY6;P2RY6	TSS1500;TSS200;1stExon;1stExon;1stExon;5'UTR;5'UTR;5'UTR	chr11:72975469-72975797
cg10939112	11.1021	2.11395e-06	0.000496374	19	58071767	ZNF550;ZNF550;ZNF550;ZNF550	TSS1500;TSS1500;TSS1500;TSS1500	chr19:58070553-58071273
cg25883020	-10.0477	2.1171e-06	0.000496958	8	41504993	NKX6-3	TSS200	chr8:41503916-41504266
cg14076729	-11.7258	2.17282e-06	0.000506879	1	38126628
cg00921309	14.8357	2.19138e-06	0.000509472	8	48091487
cg26384544	10.6579	2.20208e-06	0.00051133	8	120660846
cg10184289	10.7383	2.21505e-06	0.000513706	2	64870490	SERTAD2	5'UTR
cg21184340	14.3254	2.26127e-06	0.000522016	16	85084419	KIAA0513;KIAA0513;KIAA0513	5'UTR;5'UTR;5'UTR
cg00988236	11.2823	2.27423e-06	0.000523253	18	69828285
cg22497969	11.3985	2.31263e-06	0.000528846	1	3143018	PRDM16;PRDM16	Body;Body
cg24199203	-10.1234	2.3457e-06	0.000534369	19	3387811	NFIC;NFIC	Body;Body	chr19:3387963-3388203
cg16426670	-13.8308	2.34749e-06	0.000534386	20	2675996	EBF4	Body	chr20:2672904-2674698
cg02378702	-12.0299	2.35416e-06	0.000535536	7	31099351	ADCYAP1R1;ADCYAP1R1;ADCYAP1R1;ADCYAP1R1	5'UTR;5'UTR;5'UTR;5'UTR
cg07631144	12.0351	2.37204e-06	0.000538393	17	46657393	MIR10A	TSS200	chr17:46658948-46660003
cg09612304	16.8919	2.38725e-06	0.000540273	6	153588652
cg20761187	-11.1185	2.40891e-06	0.00054279	11	133900924	LOC100128239	TSS1500
cg13518079	-23.8836	2.43393e-06	0.000546793	20	2675072	EBF4	Body	chr20:2672904-2674698
cg16726195	-11.2063	2.45488e-06	0.00055033	6	37505024			chr6:37503538-37504291
cg01281851	10.3009	2.49661e-06	0.000555736	7	57271463			chr7:57270847-57271464
cg11725835	-12.8404	2.51328e-06	0.000558291	13	88111752	MIR4500HG	Body
cg07107113	-10.6794	2.54987e-06	0.000564423	1	16087752	FBLIM1	5'UTR	chr1:16085147-16085862
cg00948664	10.1359	2.56532e-06	0.000567008	3	48935316	SLC25A20	Body	chr3:48936041-48936457
cg00494230	11.9644	2.59483e-06	0.000571185	20	58410902	PHACTR3;PHACTR3;PHACTR3;PHACTR3;PHACTR3;PHACTR3	Body;Body;Body;Body;Body;Body
cg19038138	-10.9172	2.6443e-06	0.000579651	7	11886457
cg07707057	-12.9537	2.65798e-06	0.000581348	2	157656620
cg15445000	11.9459	2.74578e-06	0.000595638	17	37608096	MED1	TSS1500	chr17:37607393-37607718
cg08177522	10.0419	2.80373e-06	0.000604279	18	59431787
cg02458846	-10.0911	2.82215e-06	0.000606738	5	106440547
cg03832855	11.1931	2.87778e-06	0.000615482	20	9146980	PLCB4	5'UTR
cg00564285	10.0423	2.9014e-06	0.000618253	8	143809893	THEM6	Body	chr8:143807788-143809310
cg21199852	-11.8831	2.93111e-06	0.000621944	3	190583783			chr3:190580504-190580899
cg24308312	-15.6256	2.96632e-06	0.000627419	4	164910272	MARCH1	5'UTR
cg20444484	10.0377	2.99524e-06	0.000631367	15	81300124
cg11540997	-10.1737	3.01938e-06	0.000634596	15	45407818	DUOX2;DUOXA2	TSS1500;Body	chr15:45408573-45409528
cg04233669	12.3788	3.07464e-06	0.000642352	5	135173201	LOC153328	Body	chr5:135170271-135171156
cg06098368	13.5937	3.08611e-06	0.000642702	7	63386616			chr7:63386608-63386885
cg00056257	-10.9748	3.17619e-06	0.000656563	3	6901652	GRM7;GRM7	TSS1500;TSS1500	chr3:6902823-6903516
cg25954028	10.1284	3.17955e-06	0.000657076	12	124941423	NCOR2;NCOR2	Body;Body	chr12:124941314-124941584
cg07581775	21.0418	3.19849e-06	0.000659363	8	47829660
cg09253696	11.5355	3.2541e-06	0.000667901	17	73873529	TRIM47	Body	chr17:73873528-73874923
cg17598339	10.6412	3.26018e-06	0.000668785	2	170624727			chr2:170624684-170625480
cg14085177	-10.5308	3.27574e-06	0.000671064	9	133312912			chr9:133308593-133309448
cg20499714	10.2228	3.30463e-06	0.000674963	12	78140169
cg04307776	10.6318	3.33836e-06	0.000681112	5	76652757	PDE8B;PDE8B;PDE8B;PDE8B;PDE8B	Body;Body;Body;Body;Body
cg05637384	11.0749	3.35248e-06	0.000683069	7	63386671			chr7:63386608-63386885
cg12226023	-10.3852	3.36818e-06	0.000685711	2	219747079	WNT10A	Body	chr2:219748276-219748805
cg19933610	-10.5776	3.39488e-06	0.000689841	1	152346307
cg02994923	-10.6989	3.40641e-06	0.000691066	2	121303745
cg13673514	-10.3575	3.42946e-06	0.000694247	14	101035818	BEGAIN;BEGAIN	TSS1500;5'UTR	chr14:101033876-101035229
cg06415891	-10.7508	3.48242e-06	0.000702136	1	2467096			chr1:2466934-2467212
cg15682101	-10.4354	3.48951e-06	0.000702439	6	168773765			chr6:168771137-168771640
cg02749105	10.9321	3.50884e-06	0.000705012	19	58879056	ZNF837;ZNF837	3'UTR;3'UTR	chr19:58878386-58880634
cg14962509	10.5257	3.51206e-06	0.00070547	1	36039655	TFAP2E	Body	chr1:36038927-36040051
cg12613020	-13.7866	3.53214e-06	0.000708558	5	134881662			chr5:134879443-134879819
cg08893853	-10.3744	3.63631e-06	0.00072213	1	151701251	C1orf230	Body
cg07126798	10.0033	3.65914e-06	0.000725153	15	38859122			chr15:38856262-38857658
cg16462183	-10.9579	3.68701e-06	0.000730099	5	54281733	ESM1;ESM1	TSS1500;TSS1500
cg14753339	10.352	3.74159e-06	0.000738578	13	52431358
cg03389890	13.8615	3.7775e-06	0.000743911	22	16868045			chr22:16867374-16868185
cg19512582	-12.0763	3.9241e-06	0.000763272	14	61083516
cg10956183	-10.2607	3.96348e-06	0.00076921	22	46024540
cg14251509	13.4121	4.00865e-06	0.000775841	7	43239400	HECW1;HECW1	5'UTR;5'UTR
cg02354563	-12.2106	4.06987e-06	0.000785873	5	522363	SLC9A3	Body	chr5:523676-524887
cg10351869	27.9145	4.07101e-06	0.000785892	9	18057067
cg22798174	13.5274	4.08143e-06	0.000787096	2	729036			chr2:732036-733096
cg26828941	-11.9655	4.11707e-06	0.000792143	3	106632262
cg22695986	18.8726	4.24787e-06	0.000809045	7	63386815			chr7:63386608-63386885
cg26943120	12.5319	4.28314e-06	0.000813295	4	5472116	STK32B	Body
cg03956042	11.5946	4.34018e-06	0.000819991	3	194206497			chr3:194207385-194208785
cg17431280	13.1625	4.34536e-06	0.000820764	19	47507461	GRLF1	3'UTR	chr19:47507306-47507692
cg25546811	11.147	4.42589e-06	0.000831803	7	93550752	GNG11	TSS1500
cg26081717	10.2371	4.4652e-06	0.000836687	9	104249747	TMEM246;TMEM246;TMEM246	TSS1500;TSS1500;TSS1500	chr9:104248247-104249501
cg01843128	10.2294	4.47739e-06	0.0008383	11	117346519	DSCAML1	Body
cg23316599	15.0473	4.54521e-06	0.000847058	7	57271379			chr7:57270847-57271464
cg11145269	-11.4385	4.55344e-06	0.000847401	18	30192761
cg27048095	10.3298	4.59711e-06	0.000851802	13	93803492
cg06057569	13.5404	4.64976e-06	0.000856777	22	50219754	BRD1	TSS1500	chr22:50220118-50220822
cg08878450	10.2024	4.91258e-06	0.000890796	1	36915864	OSCP1;OSCP1	1stExon;1stExon	chr1:36915796-36916324
cg19760965	12.7579	5.00687e-06	0.000901599	3	194868843	C3orf21	Body
cg01794926	10.0864	5.04366e-06	0.000905652	15	92470387	SLCO3A1;SLCO3A1	Body;Body
cg06894628	11.6857	5.07426e-06	0.000910497	8	143822543	SLURP1	3'UTR	chr8:143820468-143821310
cg12646820	-10.7754	5.09554e-06	0.000912214	6	13924406	RNF182;RNF182;RNF182;RNF182	TSS1500;TSS1500;TSS1500;TSS1500	chr6:13925099-13925510
cg10447080	-10.7169	5.09594e-06	0.000912214	6	76203225	FILIP1;FILIP1	5'UTR;1stExon
cg16197161	-12.179	5.15052e-06	0.000919361	1	111307245
cg00115458	13.4331	5.17189e-06	0.000921362	6	33141305	COL11A2;COL11A2;COL11A2	Body;Body;Body
cg25162533	10.2329	5.20334e-06	0.000924845	17	81032067			chr17:81032582-81032959
cg21837025	-10.7919	5.2469e-06	0.00093045	7	101447905
cg16194588	12.3413	5.25148e-06	0.000930985	19	49002477	LMTK3	Body	chr19:49001748-49003087
cg26280727	10.8242	5.26129e-06	0.0009317	19	49000998	LMTK3	Body	chr19:49000561-49001149
cg15602677	-10.0714	5.27418e-06	0.000932376	2	1166067	SNTG2	Body	chr2:1163016-1163820
cg27243700	-10.0287	5.35146e-06	0.00094294	17	59536636	TBX4	Body	chr17:59531723-59535254
cg27438880	-10.7174	5.3558e-06	0.000943264	11	120393931	GRIK4	5'UTR
cg26688775	-10.4068	5.36439e-06	0.000943894	6	167704942	UNC93A;UNC93A;UNC93A;UNC93A	5'UTR;5'UTR;1stExon;1stExon
cg05746014	-10.3489	5.36858e-06	0.000944293	6	107860875	SOBP	Body
cg27439456	13.1366	5.37305e-06	0.000944534	1	36915840	OSCP1;OSCP1	Body;Body	chr1:36915796-36916324
cg20347139	10.3918	5.38405e-06	0.000946247	7	56605835
cg01710649	-12.8263	5.38881e-06	0.000946422	14	101036064	BEGAIN	5'UTR	chr14:101033876-101035229
cg07279557	10.0718	5.4344e-06	0.000952209	21	46875417	COL18A1;COL18A1;COL18A1	TSS200;Body;TSS200	chr21:46876168-46876752
cg15925094	10.1583	5.44485e-06	0.000953385	16	89119508			chr16:89119306-89119664
cg01995468	11.4375	5.47082e-06	0.000957254	5	176544135			chr5:176543900-176544228
cg09123897	10.6961	5.49528e-06	0.000960535	11	9774828
cg19759481	-16.1595	5.54567e-06	0.000967205	7	27183401	HOXA5	TSS200	chr7:27182613-27185562
cg16887334	13.4065	5.58649e-06	0.000971685	20	3052151	OXT	TSS200	chr20:3052097-3053103
cg03630821	10.3434	5.7484e-06	0.00099359	19	58861702	A1BG	Body	chr19:58861341-58862406
cg13717768	-11.0581	5.79051e-06	0.000998668	16	10713540
cg08166587	13.2682	5.86609e-06	0.00100723	12	2696048	CACNA1C;CACNA1C;CACNA1C;CACNA1C;CACNA1C;CACNA1C;CACNA1C;CACNA1C;CACNA1C;CACNA1C;CACNA1C;CACNA1C;CACNA1C;CACNA1C;CACNA1C;CACNA1C;CACNA1C;CACNA1C;CACNA1C;CACNA1C;CACNA1C;CACNA1C;CACNA1C	Body;Body;Body;Body;Body;Body;Body;Body;Body;Body;Body;Body;Body;Body;Body;Body;Body;Body;Body;Body;Body;Body;Body
cg17976205	-12.8345	5.91889e-06	0.00101432	20	61002857	C20orf151	TSS1500
cg17200137	-10.0492	5.91982e-06	0.00101432	10	48416896	GDF2	TSS200	chr10:48413741-48413968
cg24301930	10.7928	5.94114e-06	0.0010171	11	65408496	SIPA1;SIPA1	Body;Body	chr11:65408344-65408631
cg00356897	14.8917	5.98172e-06	0.00102011	1	24866792	LOC100506985	Body
cg07093547	11.9146	6.03509e-06	0.00102573	7	157180126	DNAJB6	Body
cg10698762	11.4171	6.05006e-06	0.00102711	16	1583463	TMEM204;TMEM204;IFT140	5'UTR;TSS200;Body	chr16:1583809-1584641
cg10792987	11.3608	6.06496e-06	0.00102864	19	18575406	ELL	Body	chr19:18572408-18572619
cg05384724	10.4818	6.27659e-06	0.00105511	12	124155451	TCTN2;TCTN2	TSS1500;TSS1500	chr12:124155578-124156171
cg22531801	10.7591	6.2926e-06	0.00105724	1	235806070	GNG4;GNG4;GNG4	5'UTR;5'UTR;5'UTR	chr1:235805318-235805771
cg18825766	-11.0372	6.53374e-06	0.00108838	4	27362758
cg20898358	10.1142	6.57635e-06	0.00109258	17	16947406	MPRIP;MPRIP	Body;Body	chr17:16945384-16946317
cg13995172	-10.6542	6.6099e-06	0.00109718	3	106682436
cg23130044	15.8572	6.70475e-06	0.00110828	22	47832878
cg02790305	11.6085	6.74778e-06	0.00111413	4	186732932	SORBS2;SORBS2;SORBS2;SORBS2;SORBS2;SORBS2;SORBS2	5'UTR;5'UTR;5'UTR;1stExon;TSS1500;1stExon;TSS1500
cg05760489	-10.3282	6.85383e-06	0.00112773	6	129639634	LAMA2;LAMA2	Body;Body
cg01855070	10.4776	6.86742e-06	0.00112923	3	42201314	TRAK1;TRAK1	TSS1500;Body
cg11936523	12.9253	6.93895e-06	0.00113603	3	149954861	LINC01213	TSS1500
cg21977234	12.3975	6.93851e-06	0.00113603	19	18701320	C19orf60;C19orf60	Body;Body	chr19:18699422-18700554
cg20964957	12.1086	6.94351e-06	0.00113641	4	62333769
cg06615754	10.9157	6.96342e-06	0.00113848	19	58193071	ZNF551	TSS1500	chr19:58193268-58193638
cg15644097	10.1065	6.97582e-06	0.00113983	2	61373028	LOC339803;C2orf74	TSS1500;5'UTR
cg25571880	-10.7662	7.05904e-06	0.00114994	2	233384489			chr2:233386614-233389161
cg19035254	17.9963	7.20687e-06	0.00116897	8	43131260			chr8:43131177-43131487
cg00430613	16.667	7.23973e-06	0.00117164	17	406426			chr17:406197-406502
cg15949805	15.2986	7.28487e-06	0.00117533	7	63505714	ZNF727	TSS200	chr7:63505977-63506298
cg16903445	-10.372	7.34404e-06	0.00118267	5	92371011
cg16835101	17.052	7.44719e-06	0.00119406	17	406380			chr17:406197-406502
cg16931969	-16.3747	7.48902e-06	0.00119746	4	113985495	ANK2;ANK2;ANK2	Body;Body;Body
cg25946573	-11.0071	7.57324e-06	0.00120555	10	44788120	C10orf142	TSS200	chr10:44788811-44789120
cg01833485	-10.686	7.63033e-06	0.00121131	1	216860692	ESRRG;ESRRG;ESRRG;ESRRG;ESRRG	5'UTR;Body;5'UTR;5'UTR;Body
cg13753585	10.7755	7.64234e-06	0.0012127	12	54677175	HNRNPA1P10;HNRNPA1;HNRNPA1	Body;Body;Body	chr12:54673322-54673550
cg25310917	12.6042	7.79495e-06	0.00123096	13	101944700	NALCN;NALCN	ExonBnd;Body
cg01301382	11.3599	7.84971e-06	0.00123701	18	15198067			chr18:15197650-15198309
cg17815933	12.8899	8.37244e-06	0.001299	12	8191646	FOXJ2	5'UTR
cg24142849	-11.6223	8.46803e-06	0.00130989	11	102057803	YAP1;YAP1;YAP1;YAP1;YAP1;YAP1;YAP1;YAP1;YAP1	Body;Body;Body;Body;Body;Body;Body;Body;Body
cg24222580	10.605	8.52834e-06	0.00131689	13	113639509	MCF2L;MCF2L	Body;Body	chr13:113635654-113635899
cg23409148	13.022	8.63006e-06	0.00132754	15	22436265
cg05389174	-10.98	8.75721e-06	0.0013413	22	20192371	LOC150197	TSS1500
cg21651541	11.1203	8.87068e-06	0.0013529	15	59583205	MYO1E	Body
cg11013284	-10.3829	8.91531e-06	0.00135608	10	15503809
cg06840491	-10.5192	9.1427e-06	0.00138251	10	48416966	GDF2	TSS200	chr10:48413741-48413968
cg21092512	-10.2174	9.18037e-06	0.00138582	8	47732721
cg08380440	14.589	9.18879e-06	0.00138682	11	2235030
cg15661311	10.3521	9.30309e-06	0.00139863	11	504551	RNH1;RNH1;RNH1;RNH1;RNH1;RNH1;RNH1;RNH1	5'UTR;5'UTR;5'UTR;5'UTR;5'UTR;5'UTR;5'UTR;5'UTR	chr11:504189-504659
cg04799343	13.2869	9.36947e-06	0.00140284	8	43102468			chr8:43101489-43102542
cg23994864	-11.7831	9.49731e-06	0.0014172	11	41415790	LRRC4C;LRRC4C	5'UTR;5'UTR
cg09465533	11.9755	9.51421e-06	0.00141915	3	32327675	CMTM8	Body
cg11911679	-10.7321	9.59315e-06	0.00142838	2	182520919	CERKL;CERKL;CERKL;CERKL;CERKL;CERKL;CERKL	Body;Body;Body;Body;Body;Body;Body	chr2:182521221-182521927
cg12075858	-11.3675	9.79315e-06	0.00144871	3	157809495			chr3:157812053-157812764
cg23264429	10.5457	9.85302e-06	0.00145528	10	90642003	STAMBPL1	5'UTR	chr10:90639787-90640623
cg15015426	-11.0162	9.92646e-06	0.00146294	1	159506559	OR10J5	TSS1500
cg10312186	12.8045	9.96559e-06	0.00146673	6	170403583			chr6:170401900-170402500
cg22650569	-10.1525	1.01196e-05	0.00148476	18	26121656
cg06512249	10.5504	1.03328e-05	0.00150644	6	29599390	GABBR1;GABBR1	Body;Body	chr6:29600192-29600661
cg08038054	10.1639	1.04465e-05	0.00151458	7	93550781	GNG11	TSS1500
cg05349624	10.1802	1.05145e-05	0.00152194	21	46856438	COL18A1	Body	chr21:46859182-46860069
cg27475365	13.297	1.06101e-05	0.00153402	6	125476259	TPD52L1;TPD52L1;TPD52L1;TPD52L1	5'UTR;Body;Body;Body	chr6:125474804-125475722
cg04132263	13.7135	1.07544e-05	0.00154894	13	79968174	RBM26;RBM26;RBM26	Body;Body;Body
cg01932197	-12.3297	1.07577e-05	0.0015491	7	83087065	SEMA3E	Body
cg10606698	-15.5835	1.08099e-05	0.00155514	6	76203642	FILIP1	TSS200
cg00380209	-13.554	1.1196e-05	0.00159123	11	55605027	OR5D16	TSS1500
cg17736057	13.4016	1.12583e-05	0.00159828	12	34372490			chr12:34371627-34372304
cg14812036	10.9445	1.13288e-05	0.00160353	10	82895774
cg25988214	12.3871	1.13659e-05	0.00160539	17	79265759	SLC38A10;SLC38A10	Body;Body	chr17:79268367-79269467
cg23812775	-11.8286	1.15261e-05	0.00162204	10	48416899	GDF2	TSS200	chr10:48413741-48413968
cg23414861	16.3032	1.1622e-05	0.00163224	6	74064064	DPPA5	TSS200	chr6:74063519-74064471
cg23366521	-10.0097	1.1987e-05	0.0016687	2	233384598	PRSS56	TSS1500	chr2:233386614-233389161
cg08260413	11.2514	1.2223e-05	0.00169373	17	54037217
cg06663305	12.8787	1.24608e-05	0.00171408	17	8095813			chr17:8092418-8093706
cg19037539	-12.0332	1.24694e-05	0.00171495	5	107011761			chr5:107005130-107008191
cg20794766	10.4425	1.26061e-05	0.00172775	15	45571824	LOC101928414	TSS1500
cg08855938	-14.3772	1.27127e-05	0.00173825	1	214398483
cg17359622	-11.5229	1.28011e-05	0.00174524	16	77756279	NUDT7;NUDT7;NUDT7;NUDT7	TSS200;TSS200;TSS200;TSS200	chr16:77756416-77756681
cg00239915	-10.7013	1.2864e-05	0.00175161	7	157809596	PTPRN2;PTPRN2;PTPRN2	Body;Body;Body
cg00223593	10.8809	1.29193e-05	0.00175599	12	34371784			chr12:34371627-34372304
cg18342119	12.3392	1.30531e-05	0.00176906	4	186733011	SORBS2;SORBS2;SORBS2;SORBS2;SORBS2;SORBS2;SORBS2;SORBS2	TSS1500;TSS1500;1stExon;1stExon;5'UTR;5'UTR;5'UTR;5'UTR
cg14952591	10.4226	1.34265e-05	0.00180652	18	33242399	GALNT1	Body
cg17846325	-10.367	1.39191e-05	0.00185571	2	79168411
cg03063309	-11.2691	1.39732e-05	0.00186127	4	24796919	SOD3	TSS200
cg19825037	-15.0555	1.43225e-05	0.00189468	11	30263038
cg03503934	13.1264	1.43216e-05	0.00189468	18	57814763
cg17866778	11.0094	1.46014e-05	0.00192132	6	26233442
cg02583091	12.6755	1.46169e-05	0.00192252	8	145638881	SLC39A4;SLC39A4	Body;Body	chr8:145637965-145639182
cg17886420	-10.7063	1.4962e-05	0.00195496	10	1796742
cg06679261	-10.4729	1.52253e-05	0.00198009	3	39850057	MYRIP;MYRIP;MYRIP;MYRIP;MYRIP	TSS1500;TSS1500;TSS1500;TSS1500;TSS1500	chr3:39851025-39851820
cg04358463	14.9232	1.53144e-05	0.00198734	19	56215104			chr19:56215229-56215576
cg25407620	-12.5831	1.54549e-05	0.00199597	6	69269829
cg19290181	12.8731	1.55319e-05	0.00200268	6	85257308
cg16180701	-10.0062	1.56124e-05	0.00201049	3	46615509	TDGF1	TSS1500	chr3:46618307-46618669
cg25400597	17.3039	1.56194e-05	0.00201051	5	52542324
cg09037093	-12.6501	1.60546e-05	0.00204896	20	29964110
cg11826726	15.0301	1.60823e-05	0.00205013	8	43131431			chr8:43131177-43131487
cg02888701	-11.7317	1.63578e-05	0.00207437	20	36561964	VSTM2L	Body
cg07222015	11.7214	1.6372e-05	0.00207583	12	127253305	LINC00944	Body
cg01746241	11.6998	1.65809e-05	0.00209597	9	34370835	KIAA1161	Body	chr9:34370773-34372902
cg19628072	-11.0123	1.66176e-05	0.00209813	20	22446131
cg06707236	10.9648	1.67054e-05	0.00210604	19	911965	C19orf22	Body	chr19:911689-911996
cg24467989	10.7152	1.69377e-05	0.00212502	13	41560747	ELF1	5'UTR
cg09060057	11.1654	1.70443e-05	0.00213341	19	24269919	ZNF254;ZNF254;ZNF254;ZNF254;ZNF254;ZNF254;ZNF254;ZNF254	TSS200;TSS200;TSS200;TSS200;TSS200;5'UTR;5'UTR;5'UTR
cg18354041	15.8796	1.72467e-05	0.00214804	10	2834411
cg23919433	11.4952	1.73089e-05	0.00215471	17	79830196	ARHGDIA	TSS1500	chr17:79828636-79830135
cg13285174	12.7101	1.75966e-05	0.0021808	20	3052221	OXT	TSS200	chr20:3052097-3053103
cg03122674	18.516	1.77543e-05	0.00219529	7	56515752	LOC650226	Body	chr7:56515585-56515864
cg05642789	13.6266	1.85534e-05	0.00226767	1	1564482	MIB2;MIB2;MIB2;MIB2;MIB2;MIB2	Body;Body;Body;Body;Body;Body	chr1:1564421-1570006
cg09288885	-13.3719	1.8748e-05	0.00228388	16	86066714
cg17715141	-13.8457	1.88766e-05	0.00229336	4	182609697
cg02879554	12.4586	1.88891e-05	0.00229336	16	2141451	MIR1225;PKD1;PKD1	TSS1500;Body;Body	chr16:2139803-2142170
cg09874683	12.2605	1.91959e-05	0.00231724	9	129925853	RALGPS1;RALGPS1;RALGPS1;RALGPS1	Body;Body;Body;Body
cg26466508	-12.1115	1.93568e-05	0.00233219	6	76203597	FILIP1	TSS200
cg02402368	10.0959	1.96593e-05	0.00235733	8	6420726	ANGPT2;ANGPT2;ANGPT2;ANGPT2;ANGPT2;ANGPT2;MCPH1	5'UTR;1stExon;5'UTR;1stExon;5'UTR;1stExon;Body	chr8:6424215-6424888
cg21363811	-14.3412	1.97924e-05	0.00236574	1	179713950	FAM163A	5'UTR	chr1:179711947-179713951
cg19643767	12.4098	1.99733e-05	0.00238039	3	181624406
cg02005600	-13.9718	2.00229e-05	0.00238271	7	27183686	HOXA5	TSS1500	chr7:27182613-27185562
cg10765212	-10.0542	2.00442e-05	0.00238411	2	190044638	COL5A2	TSS200
cg10898922	-11.0843	2.0216e-05	0.00240046	15	71145563	LARP6;LRRC49;LARP6;LARP6	Body;TSS200;Body;5'UTR	chr15:71145995-71146820
cg21723486	11.4856	2.04058e-05	0.00241758	3	189349323	TP63;TP63;TP63	1stExon;1stExon;1stExon
cg04863892	-15.0932	2.05093e-05	0.00242544	7	27183375	HOXA5	TSS200	chr7:27182613-27185562
cg13519035	14.5702	2.05019e-05	0.00242544	12	34261006			chr12:34260736-34261698
cg14497054	14.3536	2.05586e-05	0.00242957	12	34261116			chr12:34260736-34261698
cg00344422	10.1883	2.08165e-05	0.00245159	13	100149311			chr13:100150692-100151020
cg15663629	10.5713	2.11561e-05	0.00247994	7	51407987
cg15672022	10.0562	2.11555e-05	0.00247994	5	141805772
cg00361040	10.4636	2.20551e-05	0.00255136	13	73354967	PIBF1;DIS3;DIS3;DIS3	TSS1500;ExonBnd;Body;Body	chr13:73355703-73356612
cg27108629	10.0729	2.22417e-05	0.00256333	12	34503503			chr12:34503354-34503614
cg19278231	10.4926	2.27427e-05	0.00260433	3	151917052
cg02286642	10.4172	2.28748e-05	0.00261267	19	24270073	ZNF254;ZNF254	1stExon;5'UTR
cg12446452	11.066	2.3246e-05	0.00264316	22	47791630
cg07457305	-10.5907	2.33206e-05	0.00264956	2	71118292			chr2:71115927-71116412
cg01191259	-12.3543	2.33285e-05	0.00264981	15	29210460
cg18206764	10.6999	2.33969e-05	0.00265407	6	152283837	ESR1;ESR1;ESR1;ESR1;ESR1;ESR1	Body;Body;Body;Body;Body;Body
cg21733531	12.3804	2.35728e-05	0.00266815	7	63560711			chr7:63560419-63561064
cg15396830	10.662	2.42005e-05	0.00271827	4	90224479	GPRIN3	5'UTR
cg09817016	13.9622	2.43004e-05	0.00272675	5	137690920	KDM3B	Body	chr5:137688146-137689054
cg16789230	10.8662	2.50107e-05	0.00278524	3	197806891	LOC348840	Body	chr3:197807029-197808734
cg02931604	14.2107	2.51422e-05	0.00279745	6	74064298	DPPA5	TSS1500	chr6:74063519-74064471
cg15086607	-13.3059	2.51653e-05	0.00279954	3	139493523
cg21240005	10.3445	2.58297e-05	0.00285121	7	155813212
cg18723737	-10.1835	2.5925e-05	0.00285837	8	81489559			chr8:81490977-81491336
cg04357717	10.9466	2.67049e-05	0.00291661	3	102156072	ZPLD1	Body
cg04220930	10.3883	2.68057e-05	0.0029255	8	52814681			chr8:52811167-52812312
cg10753966	14.8313	2.699e-05	0.00294087	3	55556197	ERC2	3'UTR
cg19397599	-11.7084	2.71312e-05	0.00294736	5	19768250	CDH18;CDH18;CDH18;CDH18	Body;Body;Body;Body
cg12403132	10.5252	2.76364e-05	0.00298202	12	17551396
cg17434154	-10.9154	2.80146e-05	0.00301109	1	217306590	ESRRG	5'UTR	chr1:217307744-217309179
cg13115376	10.2516	2.87347e-05	0.00306447	7	63391680			chr7:63391462-63392174
cg14646039	-11.7801	2.91303e-05	0.00309248	5	152729842
cg10525394	11.9056	2.93821e-05	0.00310763	6	158097037			chr6:158093810-158094080
cg06230839	-11.0024	2.96879e-05	0.00312714	21	43189892			chr21:43186280-43187436
cg04264070	-11.6545	2.99674e-05	0.00314612	19	55887704	TMEM190	TSS1500	chr19:55889005-55889476
cg22403261	14.5583	3.064e-05	0.00319402	7	62514934			chr7:62514515-62514983
cg04095097	-10.6497	3.14562e-05	0.00325077	10	15515112
cg06278337	-13.1856	3.15487e-05	0.00325571	3	10595528
cg04612959	-10.1617	3.15516e-05	0.00325571	7	4183976	SDK1;SDK1	Body;Body
cg10702227	-12.2101	3.17934e-05	0.00327394	8	49448747
cg20002504	13.4032	3.18381e-05	0.00327675	2	241497554	ANKMY1;ANKMY1	TSS200;TSS200	chr2:241496576-241497600
cg16689481	10.349	3.19146e-05	0.00328193	1	152079713	TCHH	3'UTR	chr1:152079997-152081705
cg03996020	12.6281	3.20791e-05	0.00329498	7	157180124	DNAJB6	Body
cg01702954	-10.2377	3.29882e-05	0.00335865	5	173853159	LINC01411	Body
cg11821086	13.2047	3.31023e-05	0.00336684	2	241497544	ANKMY1;ANKMY1;ANKMY1;ANKMY1;ANKMY1;ANKMY1	TSS200;TSS200;TSS200;TSS200;TSS200;Body	chr2:241496576-241497600
cg03562414	15.2706	3.32147e-05	0.00337462	19	52391078	ZNF577;ZNF577;ZNF577	Body;5'UTR;5'UTR	chr19:52390841-52391368
cg08548486	15.2113	3.34096e-05	0.00338712	1	24866714	LOC100506985	Body
cg19492423	12.1508	3.34743e-05	0.00339276	19	18700933	C19orf60;C19orf60	Body;Body	chr19:18699422-18700554
cg25873494	11.4813	3.34972e-05	0.00339372	20	17973930
cg25778892	15.5457	3.40742e-05	0.00343581	7	1250126			chr7:1250826-1251141
cg05200768	-11.5224	3.44827e-05	0.00346413	5	141196613
cg22369879	11.3076	3.45798e-05	0.00347143	3	137228636
cg27292818	11.4005	3.48109e-05	0.00348546	19	56151972	ZNF580;ZNF580;ZNF580	TSS1500;TSS1500;TSS1500	chr19:56151516-56152792
cg06507634	11.3558	3.48184e-05	0.00348546	16	31439106	COX6A2	Body	chr16:31438891-31439682
cg17548689	-10.9208	3.53735e-05	0.00352524	7	89842010	STEAP2-AS1;STEAP2;STEAP2;STEAP2;STEAP2;STEAP2;STEAP2	TSS1500;TSS1500;5'UTR;5'UTR;5'UTR;5'UTR;5'UTR	chr7:89840813-89841491
cg13620184	10.711	3.54683e-05	0.00353077	21	28647755
cg13921444	12.4861	3.59503e-05	0.00356317	4	186733024	SORBS2;SORBS2;SORBS2;SORBS2;SORBS2;SORBS2;SORBS2	5'UTR;5'UTR;5'UTR;1stExon;TSS1500;1stExon;TSS1500
cg10358206	-10.9919	3.59598e-05	0.00356365	4	47665189	CORIN;CORIN;CORIN	Body;Body;Body
cg26530706	-12.4879	3.63311e-05	0.0035877	18	32173093	DTNA;DTNA;DTNA;DTNA	TSS200;5'UTR;5'UTR;5'UTR
cg02305659	-10.3391	3.65196e-05	0.00359783	9	6218151	IL33;IL33;IL33	5'UTR;5'UTR;5'UTR
cg25124095	-15.2705	3.65429e-05	0.00359918	1	214398181
cg23548623	10.3439	3.65711e-05	0.00360011	8	43136162			chr8:43132045-43132478
cg12569246	-12.8172	3.6687e-05	0.00360912	6	76203666	FILIP1	TSS200
cg15414745	14.2223	3.68319e-05	0.00361817	6	74064047	DPPA5	TSS200	chr6:74063519-74064471
cg01682111	12.6775	3.68485e-05	0.00361839	16	1430087	UNKL	TSS1500	chr16:1429050-1430104
cg14292870	-12.9646	3.73038e-05	0.00364741	12	6887543	LAG3	Body
cg05324991	-15.9624	3.77085e-05	0.0036722	2	103089081	SLC9A4	TSS1500
cg18313661	12.7207	3.78726e-05	0.00368295	7	63560590			chr7:63560419-63561064
cg25264181	10.725	3.79238e-05	0.0036865	8	107630259	OXR1;OXR1;OXR1	Body;Body;Body
cg05825244	-21.8364	3.83582e-05	0.00371578	20	2730488	EBF4	Body	chr20:2729997-2730797
cg04524417	-11.3938	3.84227e-05	0.00372032	4	129605243
cg26320504	-11.029	3.87662e-05	0.00374566	7	157809385	PTPRN2;PTPRN2;PTPRN2	Body;Body;Body
cg10635122	10.0144	3.93723e-05	0.00378626	19	52391090	ZNF577;ZNF577;ZNF577;ZNF577	Body;5'UTR;5'UTR;1stExon	chr19:52390841-52391368
cg16931068	-10.2952	3.95527e-05	0.00379828	20	139680	DEFB127	3'UTR
cg17569124	-15.4628	3.9865e-05	0.00381886	7	27183643	HOXA5	TSS1500	chr7:27182613-27185562
cg21281009	13.433	3.99168e-05	0.00382155	18	14748298	ANKRD30B;ANKRD30B	1stExon;5'UTR	chr18:14747516-14748231
cg09549073	-14.5618	4.00545e-05	0.00383037	7	27183274	HOXA5;HOXA5	5'UTR;1stExon	chr7:27182613-27185562
cg04048634	-10.4826	4.01471e-05	0.00383531	4	46126066	GABRG1;GABRG1	5'UTR;1stExon
cg09071762	11.9498	4.04162e-05	0.00385203	6	74064149	DPPA5	TSS200	chr6:74063519-74064471
cg00741432	-12.0423	4.06341e-05	0.00386322	4	75860346	PARM1	Body	chr4:75858300-75859931
cg05132077	-17.5122	4.06623e-05	0.00386531	22	49448320			chr22:49447339-49448283
cg21869046	10.7042	4.09416e-05	0.00388344	19	41225005	ITPKC	Body	chr19:41222598-41223162
cg20617328	12.4184	4.33113e-05	0.00404324	6	33040610	HLA-DPA1	Body
cg13753488	12.3646	4.34544e-05	0.00404857	9	136001623	RALGDS	Body
cg09465703	10.1321	4.36189e-05	0.00405787	16	733842	JMJD8	Body	chr16:729438-735815
cg08626436	-10.8371	4.46158e-05	0.00412222	10	88555339	BMPR1A	5'UTR
cg15116095	10.2317	4.50939e-05	0.00415608	5	140166589	PCDHA1;PCDHA1;PCDHA1	1stExon;1stExon;1stExon	chr5:140167091-140168139
cg13689996	-10.1493	4.53786e-05	0.00417567	17	71810497	C17orf54	Body
cg03034070	-10.4289	4.62901e-05	0.00423884	2	190044841	COL5A2	TSS1500
cg00600584	11.7941	4.65055e-05	0.00425237	3	189347814	TP63;TP63;TP63	TSS1500;TSS1500;TSS1500
cg12295186	-14.4329	4.66363e-05	0.00425906	18	20070806
cg12276019	10.5251	4.66822e-05	0.00426179	8	11057947	XKR6	Body	chr8:11057684-11058479
cg18729664	-12.1687	4.67462e-05	0.00426557	6	76203675	FILIP1	TSS200
cg05807260	-11.8821	4.78611e-05	0.00432954	3	73776305
cg05210606	13.3272	4.82257e-05	0.00435572	17	22203008
cg02565993	-10.8029	4.83242e-05	0.00436148	11	27015592	FIBIN	TSS200
cg24550112	13.9081	4.84939e-05	0.00437104	1	14027521	PRDM2	5'UTR	chr1:14026481-14027200
cg01603291	-11.7124	4.86547e-05	0.00438282	6	51618661	PKHD1;PKHD1	Body;Body
cg13170076	-10.8072	4.87965e-05	0.00439096	2	382356
cg23955273	11.4247	4.89679e-05	0.00440322	4	26328591	RBPJ;RBPJ;RBPJ;RBPJ	Body;Body;5'UTR;Body
cg20517050	-14.8915	4.92603e-05	0.00442399	7	27183806	HOXA5	TSS1500	chr7:27182613-27185562
cg11724970	-12.7053	4.96531e-05	0.0044489	7	27182493	HOXA5	Body	chr7:27182613-27185562
cg24603803	-11.4312	5.01399e-05	0.0044802	1	100111849	PALMD;PALMD	1stExon;5'UTR
cg05317207	11.5331	5.02432e-05	0.00448523	19	58867669	ZNF497	Body	chr19:58867397-58868868
cg14530637	13.4258	5.08993e-05	0.00452415	16	2917732			chr16:2918179-2918680
cg14535531	11.4905	5.10706e-05	0.00453438	18	52258182	C18orf26	TSS1500
cg24796651	11.1048	5.11582e-05	0.00453988	4	76912348	SDAD1	TSS1500	chr4:76911843-76912252
cg17213394	-10.7213	5.18784e-05	0.00458665	13	23662385
cg08292485	-10.5119	5.19768e-05	0.00459372	20	29993663	DEFB121	Body
cg23395887	16.3665	5.2317e-05	0.0046162	16	90143802	PRDM7	TSS1500	chr16:90143683-90144081
cg13149686	-13.1257	5.2421e-05	0.00462214	14	20691680	OR11H6	TSS200
cg17452565	11.176	5.25127e-05	0.00462751	6	2768847	WRNIP1;WRNIP1	Body;Body	chr6:2765203-2766775
cg22332722	-12.2677	5.27564e-05	0.00464117	18	25754857	CDH2	Body	chr18:25755414-25758175
cg22987448	12.431	5.30954e-05	0.0046625	19	8591364	MYO1F	Body	chr19:8591294-8591842
cg22076941	-10.1957	5.3132e-05	0.004664	1	70036106			chr1:70032967-70034495
cg06905720	14.1387	5.40836e-05	0.00471574	4	145512579
cg00270625	12.5382	5.46593e-05	0.00475079	22	51017019	CPT1B;CPT1B;CPT1B;CPT1B;CHKB-CPT1B;CPT1B;CPT1B;CPT1B;CPT1B;CPT1B;CPT1B;CPT1B	1stExon;TSS1500;1stExon;5'UTR;Body;1stExon;5'UTR;TSS200;TSS200;1stExon;5'UTR;5'UTR	chr22:51016253-51017020
cg04392082	12.0804	5.49205e-05	0.00476335	4	186732926	SORBS2;SORBS2;SORBS2;SORBS2;SORBS2;SORBS2;SORBS2	5'UTR;5'UTR;5'UTR;1stExon;TSS1500;1stExon;TSS1500
cg19107973	10.5383	5.57243e-05	0.00481035	5	61876634	IPO11;IPO11;LRRC70	Body;Body;Body
cg04674565	13.4339	5.68962e-05	0.0048802	4	236190	ZNF876P	Body
cg00454305	11.0289	5.70608e-05	0.00488982	16	1429905	UNKL	TSS1500	chr16:1429050-1430104
cg25161899	13.0867	5.76571e-05	0.0049236	11	85028237	DLG2	Body
cg16649423	-10.9243	5.83839e-05	0.00496548	3	46615620	TDGF1	TSS1500	chr3:46618307-46618669
cg05892994	-11.4004	5.85814e-05	0.0049777	3	180522985	LOC101928882	Body
cg05493407	22.7653	5.95915e-05	0.00503513	4	164816619	MARCH1	5'UTR
cg08504662	10.0606	6.07065e-05	0.00509846	19	58868256	ZNF497	Body	chr19:58867397-58868868
cg19092981	-19.3353	6.08861e-05	0.00510721	22	19751654	TBX1;TBX1;TBX1	Body;Body;Body	chr22:19751653-19751909
cg19211853	12.3337	6.09602e-05	0.00511122	13	79968216	RBM26	Body
cg20893180	-12.834	6.12448e-05	0.00513051	8	36957379
cg08401758	10.1642	6.12591e-05	0.00513114	16	87887443	SLC7A5	Body
cg25987564	-15.23	6.21623e-05	0.00518259	4	6010075			chr4:6009868-6010112
cg10146935	-17.538	6.24178e-05	0.00519928	1	871308	SAMD11	Body	chr1:869332-871872
cg26262573	12.6035	6.29466e-05	0.00522715	7	56516129	LOC650226	TSS200	chr7:56515585-56515864
cg06306577	-10.709	6.32382e-05	0.00524381	11	126760641	KIRREL3;KIRREL3;KIRREL3	Body;Body;Body
cg07162861	10.4822	6.41046e-05	0.00528949	15	91416008	FURIN;FURIN;FURIN	5'UTR;5'UTR;TSS200	chr15:91414311-91415427
cg21937377	10.1115	6.50397e-05	0.00534091	3	194868750	C3orf21	Body
cg01952185	-11.5104	6.57477e-05	0.00537911	5	134813213
cg03829739	14.9247	6.62187e-05	0.00540707	7	56515510	LOC650226	Body	chr7:56515585-56515864
cg22363511	10.5267	6.628e-05	0.00541032	14	38017272	MIPOL1;MIPOL1;MIPOL1	3'UTR;3'UTR;3'UTR
cg17748769	10.4162	6.80509e-05	0.00550831	7	158352181	PTPRN2;PTPRN2;PTPRN2	Body;Body;Body	chr7:158349387-158350091
cg07986251	14.9943	6.85881e-05	0.00553973	8	107630133	OXR1;OXR1;OXR1	Body;Body;Body
cg23344436	10.2474	6.8941e-05	0.00555692	22	46454104	PRR34-AS1	Body	chr22:46449632-46450115
cg10894085	10.0262	6.89316e-05	0.00555692	14	91817232	CCDC88C	Body
cg10870815	10.5081	6.93309e-05	0.0055766	12	2696108	CACNA1C;CACNA1C;CACNA1C;CACNA1C;CACNA1C;CACNA1C;CACNA1C;CACNA1C;CACNA1C;CACNA1C;CACNA1C;CACNA1C;CACNA1C;CACNA1C;CACNA1C;CACNA1C;CACNA1C;CACNA1C;CACNA1C;CACNA1C;CACNA1C;CACNA1C;CACNA1C	Body;Body;Body;Body;Body;Body;Body;Body;Body;Body;Body;Body;Body;Body;Body;Body;Body;Body;Body;Body;Body;Body;Body
cg02179982	-10.4724	7.0045e-05	0.0056174	22	46365647	WNT7B	Body	chr22:46366726-46368726
cg07823056	10.2899	7.03547e-05	0.00563185	19	38794795	YIF1B;YIF1B;YIF1B;YIF1B;YIF1B;YIF1B;C19orf33	3'UTR;3'UTR;3'UTR;3'UTR;3'UTR;3'UTR;TSS200
cg12519676	-11.4663	7.04794e-05	0.00563704	4	174912210
cg09207400	-12.1199	7.06834e-05	0.00564635	7	27183382	HOXA5;HOXA-AS3	TSS200;Body	chr7:27182613-27185562
cg06344992	10.4794	7.14031e-05	0.00568605	15	90345999	ANPEP	Body
cg10372920	-11.0509	7.15796e-05	0.00569541	17	5800501
cg09258553	14.2836	7.19299e-05	0.00571543	2	241564827			chr2:241562469-241562910
cg13372591	15.2679	7.1943e-05	0.00571587	7	62514928			chr7:62514515-62514983
cg14014955	-12.414	7.28524e-05	0.0057654	7	27183701	HOXA5	TSS1500	chr7:27182613-27185562
cg03453449	-10.3561	7.28867e-05	0.00576711	12	95945120	USP44;USP44	1stExon;5'UTR	chr12:95941906-95942979
cg11437810	10.5972	7.37878e-05	0.00582069	15	69744829	RPLP1;RPLP1	TSS1500;TSS1500	chr15:69745049-69745746
cg01590762	-10.9655	7.42475e-05	0.00584166	6	121914368
cg13620499	15.0775	7.46523e-05	0.00586554	9	136353126
cg19954602	-12.418	7.61053e-05	0.00594622	6	76203532	FILIP1	TSS200
cg12233487	-10.3493	7.61294e-05	0.00594748	20	2517085	TMC2	TSS200
cg12743638	-13.2543	7.63821e-05	0.00595673	22	20192485	LOC150197	TSS1500
cg00001099	-12.059	7.65262e-05	0.00596358	8	87081553	PSKH2	Body	chr8:87081653-87082046
cg01414567	20.4674	7.65704e-05	0.00596585	12	82204306
cg27130049	-11.9247	7.69686e-05	0.00598696	4	108745001	SGMS2	TSS1500	chr4:108745829-108746535
cg09135656	10.8114	7.79847e-05	0.00604041	5	140625848	PCDHB15	1stExon	chr5:140626444-140627373
cg05857996	-30.4345	7.8535e-05	0.0060631	20	2675418	EBF4	Body	chr20:2672904-2674698
cg23455837	-11.2007	7.91163e-05	0.00609299	7	157809325	PTPRN2;PTPRN2;PTPRN2	Body;Body;Body
cg10895875	10.9371	7.91366e-05	0.00609348	7	56242407			chr7:56242406-56243298
cg10866391	-10.9037	8.07306e-05	0.00618066	3	158991454	SCHIP1;SCHIP1;SCHIP1;SCHIP1;SCHIP1;SCHIP1;IQCJ-SCHIP1;IQCJ-SCHIP1	5'UTR;5'UTR;5'UTR;1stExon;1stExon;1stExon;Body;Body
cg05835514	-10.9326	8.29506e-05	0.00630217	5	152870795	GRIA1;GRIA1;GRIA1;GRIA1;GRIA1;GRIA1;GRIA1;GRIA1	TSS1500;TSS1500;TSS200;5'UTR;Body;Body;Body;Body
cg16734913	15.3055	8.35965e-05	0.00633823	11	55681277	OR5W2	1stExon
cg07102320	-10.5271	8.36621e-05	0.00634141	11	46171075
cg15079315	10.9933	8.37923e-05	0.00634783	20	4981089	SLC23A2;SLC23A2	5'UTR;5'UTR
cg02380135	10.3817	8.47939e-05	0.00640837	2	149866270	KIF5C	Body	chr2:149866654-149866890
cg03068497	10.9892	8.57259e-05	0.00646131	7	30635838	GARS	Body	chr7:30634124-30635058
cg04202774	-10.6686	8.66105e-05	0.00651067	4	149716539
cg01981733	10.6666	8.69475e-05	0.00652821	7	56297714			chr7:56297432-56297662
cg16335098	13.322	8.76072e-05	0.00655913	6	169334849			chr6:169331837-169332301
cg21153102	11.5098	8.77984e-05	0.00657018	15	41252147
cg02694170	-10.2178	8.78543e-05	0.00657205	12	115888757			chr12:115889597-115889995
cg19022254	10.5496	8.86204e-05	0.00661134	6	29601705	GABBR1;GABBR1	TSS1500;TSS1500	chr6:29600192-29600661
cg18968920	10.5736	8.99171e-05	0.00667567	2	153572548	PRPF40A	Body	chr2:153573743-153575553
cg18531903	-10.0168	8.99594e-05	0.00667593	10	60218058
cg17353412	16.2283	9.03161e-05	0.00669737	7	27141774	HOXA2	1stExon	chr7:27143181-27143479
cg23638042	12.0321	9.04712e-05	0.00670426	8	43101403			chr8:43101489-43102542
cg17372223	11.639	9.24068e-05	0.00680618	3	52568218	NT5DC2;NT5DC2	Body;TSS1500	chr3:52567009-52568807
cg23615892	-11.9276	9.26721e-05	0.00681963	1	215825505	USH2A	Body
cg18674653	-10.0807	9.29931e-05	0.00683438	6	129639131	LAMA2;LAMA2	Body;Body
cg06154311	-14.4556	9.39416e-05	0.00688154	20	61002657	C20orf151	TSS200
cg11429111	-11.1346	9.48531e-05	0.00692054	5	134813329
cg02025944	10.3936	9.57759e-05	0.0069678	4	80998921
cg24059708	-11.6684	9.84139e-05	0.0071021	10	57170612
cg21461564	-11.6129	9.84133e-05	0.0071021	8	63999030	TTPA	TSS1500	chr8:63998227-63998737
cg14983225	11.2806	9.95905e-05	0.00715751	2	163879745
cg09749225	10.9759	9.99702e-05	0.00717546	6	168106055			chr6:168106020-168106223
cg01503679	-12.5283	0.000100042	0.00717764	10	37598001	LINC00993	TSS200
cg13805518	-13.5647	0.000101524	0.00724383	15	80697783	ARNT2	Body	chr15:80696076-80697393
cg01459854	-10.6219	0.000101728	0.00725504	14	62583388	FLJ43390	TSS1500	chr14:62583679-62584279
cg21334513	-12.59	0.000102975	0.007315	6	30095248			chr6:30095173-30095610
cg15327692	10.9799	0.000105507	0.00743729	15	38859132			chr15:38856262-38857658
cg20824294	12.4688	0.000106495	0.00748378	3	142316082	PLS1	5'UTR	chr3:142315171-142315567
cg20596640	10.3622	0.000107814	0.00755062	13	20436062	ZMYM5;ZMYM5;ZMYM5	5'UTR;5'UTR;5'UTR	chr13:20436776-20439089
cg01933073	12.0777	0.000109282	0.00761573	4	186732942	SORBS2;SORBS2;SORBS2;SORBS2;SORBS2;SORBS2;SORBS2	5'UTR;5'UTR;5'UTR;1stExon;TSS1500;1stExon;TSS1500
cg22088683	14.7592	0.000112364	0.00775587	8	145639037	SLC39A4;SLC39A4;SLC39A4	Body;Body;TSS200	chr8:145637965-145639182
cg01797450	-10.5187	0.000112487	0.0077621	6	168134760			chr6:168135847-168136065
cg25212397	12.9165	0.000112919	0.00777925	11	102184373			chr11:102188179-102188440
cg06804823	10.3295	0.000115649	0.00790514	6	31798635			chr6:31795467-31797384
cg24597353	-13.3703	0.000115756	0.00791111	4	177714618	VEGFC	TSS1500	chr4:177713243-177714457
cg07286216	16.2995	0.000115965	0.00792023	7	56515846	LOC650226	Body	chr7:56515585-56515864
cg14488962	-11.8387	0.000116342	0.00793427	11	131510278	NTM	Body
cg21690805	10.5845	0.00011848	0.0080427	22	50631268	TRABD	5'UTR	chr22:50632707-50633041
cg13778567	13.6666	0.000118513	0.00804322	6	32609783	HLA-DQA1	Body
cg08790320	11.4319	0.000118991	0.00806269	13	102105786	ITGBL1;ITGBL1;ITGBL1	5'UTR;Body;Body	chr13:102106165-102106488
cg06091474	12.3743	0.00012243	0.00821948	7	80549363	SEMA3C	TSS1500	chr7:80548306-80548726
cg04913265	12.091	0.000122544	0.00822493	11	133939627	JAM3	Body	chr11:133938850-133939681
cg21066950	18.122	0.000123919	0.00828396	2	241564473	GPR35;GPR35;GPR35	TSS200;Body;Body	chr2:241562469-241562910
cg19155391	11.7191	0.000123912	0.00828396	7	63505768	ZNF727	TSS200	chr7:63505977-63506298
cg05076221	-14.7984	0.000125954	0.00836506	7	27182637	HOXA5	Body	chr7:27182613-27185562
cg16081457	-13.3364	0.000128614	0.00848266	12	81103680			chr12:81102034-81102716
cg09862081	10.4953	0.000130907	0.00860077	15	49149387	SHC4	Body
cg20765408	11.8079	0.000131038	0.00860783	13	25085669	PARP4	5'UTR	chr13:25086522-25087067
cg12369091	-10.3882	0.000131566	0.00863353	12	108495363
cg11482914	-11.5084	0.000132557	0.0086789	3	165555260	BCHE	TSS200
cg22517730	-12.216	0.000133175	0.00870725	3	127085543	LOC101927123	Body
cg11568697	14.207	0.00013473	0.00878747	18	72916393	ZADH2	Body	chr18:72916107-72917233
cg00729370	-12.6653	0.000138195	0.00895083	8	47527657			chr8:47528989-47529374
cg14624145	11.6553	0.000138554	0.00896711	17	37024169			chr17:37025737-37027104
cg20974609	-10.0752	0.00014353	0.00918108	7	27181671	HOXA5	Body	chr7:27182613-27185562
cg08384611	-10.4601	0.000146696	0.00933208	9	38689983
cg20988098	11.7031	0.000149675	0.00946877	6	157931791	ZDHHC14;ZDHHC14	Body;Body
cg06585566	10.5002	0.000154227	0.00964977	19	57276794			chr19:57276614-57276942
cg12485972	11.7049	0.000155561	0.00970583	2	241564624	GPR35;GPR35;GPR35	TSS200;Body;Body	chr2:241562469-241562910
cg03454353	10.5028	0.00015731	0.0097717	9	115819364	ZFP37	TSS1500	chr9:115818836-115819343
cg14748380	-16.1129	0.000159258	0.00985732	1	179713788	FAM163A	5'UTR	chr1:179711947-179713951
