# Supplementary material for: DNA methylation epi-signature is associated with two molecularly and phenotypically distinct clinical subtypes of Phelan-McDermid syndrome
Source: Clin Epigenetics. 2021 Jan 6;13:2. doi: 10.1186/s13148-020-00990-7 (PMC7789817; doi:10.1186/s13148-020-00990-7)
Supplement: Supplementary file 2 — Additional file 2: Table S2. PHMDS and control sample information. Details for each sample listed include: age, sex, and the predicted cell type composition. [file 13148_2020_990_MOESM2_ESM.xlsx]

## Sheet: Sheet 1
			Predicted cell type proportions									Mean values
Sample Type	Age (years)	Sex	CD8T	CD4T	NK	Bcell	Mono	Gran			Sample Type	Proportion male	age	CD8T	CD4T	NK	Bcell	Mono	Gran
PHMDS large deletion	17	f	0.116	0.28	0.002	0.006	0.027	0.545			PHMDS large deletion	0.45	8.5	0.125	0.216	0.006	0.085	0.043	0.503
PHMDS large deletion	3	f	0.099	0.178	0	0.074	0.053	0.573			PHMDS small deletion	0.55	12.2	0.084	0.195	0.059	0.064	0.042	0.529
PHMDS large deletion	5	m	0.163	0.233	0.011	0.061	0.016	0.503			Control	0.57	9.7	0.085	0.212	0.052	0.1	0.051	0.464
PHMDS large deletion	15	m	0.107	0.174	0	0.046	0.046	0.618
PHMDS large deletion	9	m	0.058	0.092	0.031	0.109	0.09	0.599
PHMDS large deletion	3	m	0.164	0.216	0	0.157	0.062	0.385
PHMDS large deletion	8	f	0.106	0.166	0	0.07	0.044	0.585
PHMDS large deletion	3	f	0.171	0.218	0	0.077	0.032	0.48			Controls are the control samples matched to the PHMDS large deletion samples for episignature detection.
PHMDS large deletion	17	m	0.085	0.215	0	0.1	0.051	0.531
PHMDS large deletion	3	f	0.18	0.304	0.017	0.116	0.031	0.301
PHMDS large deletion	10	f	0.131	0.304	0	0.119	0.024	0.41
PHMDS small deletion	18	m	0.049	0.165	0	0.063	0.078	0.627
PHMDS small deletion	19	f	0.045	0.201	0.054	0.101	0.032	0.537
PHMDS small deletion	6	f	0.129	0.262	0	0.113	0.007	0.451
PHMDS small deletion	15	f	0.09	0.149	0.119	0.009	0.013	0.588
PHMDS small deletion	14	m	0.075	0.175	0.065	0.031	0	0.638
PHMDS small deletion	10	m	0.081	0.202	0.102	0.097	0.056	0.431
PHMDS small deletion	10	f	0.102	0.317	0	0.06	0.001	0.487
PHMDS small deletion	15	f	0.07	0.144	0.07	0.03	0.044	0.62
PHMDS small deletion	4	m	0.024	0.168	0.077	0.05	0.084	0.571
PHMDS small deletion	10	m	0.089	0.228	0.1	0.09	0.056	0.397
PHMDS small deletion	13	m	0.17	0.136	0.066	0.063	0.09	0.47
Control	27.9	m	0.044	0.157	0	0.084	0.053	0.647
Control	0	f	0.089	0.27	0	0.119	0.13	0.373
Control	2	f	0.084	0.444	0	0.113	0	0.297
Control	6.9	m	0.147	0.188	0.031	0.145	0.052	0.401
Control	3	f	0.113	0.304	0.026	0.163	0	0.322
Control	8	m	0.112	0.309	0	0.196	0.028	0.329
Control	18	f	0.049	0.189	0.011	0	0.141	0.585
Control	28.5	m	0.187	0.091	0.065	0.077	0.122	0.438
Control	45.3	m	0.006	0.154	0.034	0.041	0.072	0.69
Control	13	m	0.048	0.22	0.11	0.048	0.095	0.428
Control	15	m	0.028	0.167	0	0.106	0.077	0.605
Control	10	m	0.051	0.103	0	0.109	0.066	0.652
Control	3	m	0.143	0.154	0.032	0.134	0.035	0.471
Control	4	m	0.089	0.341	0	0.138	0.009	0.393
Control	3	m	0.136	0.177	0.036	0.051	0.029	0.549
Control	5	f	0.066	0.271	0.124	0.009	0.039	0.405
Control	8	f	0.018	0.306	0.099	0.116	0.018	0.362
Control	10	m	0.096	0.207	0	0.087	0.057	0.528
Control	2	m	0.097	0.355	0.159	0.098	0.028	0.221
Control	6	f	0.035	0.133	0.136	0.104	0.052	0.498
Control	9	f	0.045	0.112	0.083	0.102	0.042	0.578
Control	7	m	0.121	0.18	0.094	0.044	0.046	0.47
Control	3	m	0.211	0.229	0.234	0.12	0.02	0.136
Control	15	f	0.101	0.338	0	0.09	0.019	0.404
Control	4	m	0.091	0.12	0.014	0.074	0.047	0.629
Control	20.5	f	0.03	0.217	0.139	0.092	0.057	0.474
Control	8	m	0.072	0.171	0	0.091	0.063	0.572
Control	10	m	0.049	0.121	0.131	0.029	0.066	0.587
Control	4	f	0.093	0.354	0	0.167	0.03	0.275
Control	11	m	0.172	0.247	0.051	0.063	0.112	0.32
Control	4	m	0.127	0.175	0.006	0.096	0.055	0.513
Control	10	f	0.047	0.128	0.036	0.057	0.051	0.645
Control	5	f	0	0.175	0.009	0.21	0.137	0.42
Control	2	f	0.16	0.369	0	0.118	0	0.307
Control	8	m	0.137	0.228	0	0.127	0.018	0.458
Control	12.7	m	0.23	0.187	0	0.212	0.03	0.358
Control	13	m	0.066	0.222	0.031	0.095	0.036	0.509
Control	6	f	0.043	0.195	0.024	0.057	0.093	0.503
Control	12	f	0.044	0.158	0.134	0.054	0.052	0.512
Control	10	f	0.014	0.119	0.068	0.114	0.032	0.617
Control	16	f	0.034	0.09	0.04	0	0.079	0.736
Control	12	f	0.117	0.179	0.155	0.053	0.037	0.432
Control	5	m	0.031	0.118	0.169	0.178	0.012	0.417
Control	1	m	0.068	0.341	0	0.199	0	0.371
P-value (PHMDS x control)			0.0622751	0.37419	0.0662256	0.016483	0.155181	0.0357522
p-value (PHMDS-Large Del x control)			0.00563649	0.421164	8.59029e-06	0.168095	0.187467	0.151643
