# Supplementary material for: DNA methylation epi-signature is associated with two molecularly and phenotypically distinct clinical subtypes of Phelan-McDermid syndrome
Source: Clin Epigenetics. 2021 Jan 6;13:2. doi: 10.1186/s13148-020-00990-7 (PMC7789817; doi:10.1186/s13148-020-00990-7)
Supplement: Supplementary file 5 — Additional file 5: Table S4. Metabolic profiling plates. Table includes listing of substrates in the individual wells of the metabolic profiling plates. [file 13148_2020_990_MOESM5_ESM.xlsx]

## Sheet: PM1
PM-M1 (Energy sources)
well	CMS	mean_small_deletion_p	mean_cntrl	p.value	adj_p	Note		well	CMS	mean_large_deletion_p	mean_cntrl	p.value	adj_p	Note
B01	D-Glucose-6-Phosphate	1.9759	2.87263	0.00248431	0.146711	Control avg is higher		D06	D-Fructose-6-Phosphate	1.84679	2.76317	7.26114e-05	0.00697069	Control avg is higher
B02	D-Glucose-1-Phosphate	3.54163	5.27806	0.00305648	0.146711	Control avg is higher		B02	D-Glucose-1-Phosphate	3.47376	5.27806	0.000538042	0.025826	Control avg is higher
D06	D-Fructose-6-Phosphate	2.00906	2.76317	0.0052166	0.166931	Control avg is higher		C01	D-GlucosaminicAcid	3.08451	4.12018	0.00244874	0.0565375	Control avg is higher
A01	NegativeControl	1.21007	1.49569	0.037842	0.218525	Control avg is higher		E03	D-Galactose	2.81792	3.78467	0.00202949	0.0565375	Control avg is higher
A03	NegativeControl	1.21567	1.48989	0.0221736	0.218525	Control avg is higher		H04	D,L-a-Hydroxy-ButyricAcid	1.64098	2.00215	0.00313107	0.0565375	Control avg is higher
A04	a-Cyclodextrin	1.38076	1.73128	0.0247542	0.218525	Control avg is higher		H05	b-Hydroxy-ButyricAcid	2.07368	2.56429	0.0035336	0.0565375	Control avg is higher
C01	D-GlucosaminicAcid	3.25965	4.12018	0.0398326	0.218525	Control avg is higher		D02	L-Sorbose	0.78009	0.996641	0.00422611	0.057958	Control avg is higher
D01	D-Tagatose	0.79898	1.06719	0.0537322	0.218525	Control avg is higher		C06	a-Methyl-D-Mannoside	1.0257	1.28516	0.00839733	0.0709852	Control avg is higher
D02	L-Sorbose	0.830422	0.996641	0.0537322	0.218525	Control avg is higher		D04	L-Fucose	0.973462	1.21148	0.00887315	0.0709852	Control avg is higher
D03	L-Rhamnose	2.30341	2.78513	0.0487064	0.218525	Control avg is higher		D05	D-Fucose	1.19302	1.54573	0.00751358	0.0709852	Control avg is higher
E01	MelibionicAcid	1.57755	1.97419	0.0591838	0.218525	Control avg is higher		F02	L-Arabinose	1.31938	1.66322	0.00839733	0.0709852	Control avg is higher
E02	D-Melibiose	2.07258	2.53182	0.0564032	0.218525	Control avg is higher		H02	g-AminoButyricAcid	1.67576	2.04727	0.00751358	0.0709852	Control avg is higher
E03	D-Galactose	2.89536	3.78467	0.0092248	0.218525	Control avg is higher		B04	D-(+)-Glucose	10.8555	13.0955	0.0104484	0.0716461	Control avg is higher
E04	a-Methyl-D-Galactoside	2.31832	2.86517	0.0511676	0.218525	Control avg is higher		B05	D-(+)-Glucose	5.04731	6.18129	0.00989765	0.0716461	Control avg is higher
E05	b-Methyl-D-Galactoside	1.92471	2.28516	0.0591838	0.218525	Control avg is higher		A02	NegativeControl	1.84006	2.34687	0.0122677	0.0785135	Control avg is higher
E06	n-acetyl-neuraminicacid	1.99613	2.47121	0.0221736	0.218525	Control avg is higher		H10	PropionicAcid	1.04422	0.782779	0.0136315	0.0817891	Large deletion patients' avg is higher
F01	Adonitol	2.08007	2.59334	0.0117595	0.218525	Control avg is higher		B01	D-Glucose-6-Phosphate	2.22121	2.87263	0.0167663	0.0890826	Control avg is higher
F04	b-Methyl-D-Xyloside	1.28165	1.5445	0.0537322	0.218525	Control avg is higher		C05	D-Mannose	5.63175	6.74309	0.0167663	0.0890826	Control avg is higher
F06	m-Inositol	2.24743	2.69799	0.0268545	0.218525	Control avg is higher		E06	n-acetyl-neuraminicacid	2.01683	2.47121	0.0185589	0.0890826	Control avg is higher
G05	PyruvicAcid	1.14458	1.39639	0.0511676	0.218525	Control avg is higher		H03	a-Keto-ButyricAcid	1.01968	1.30835	0.0185589	0.0890826	Control avg is higher
G08	SuccinicAcid	2.5965	3.10853	0.0234331	0.218525	Control avg is higher		A04	a-Cyclodextrin	1.3947	1.73128	0.0288564	0.110809	Control avg is higher
H02	g-AminoButyricAcid	1.72667	2.04727	0.0359366	0.218525	Control avg is higher		A05	Dextrin	4.78268	6.20617	0.0288564	0.110809	Control avg is higher
H03	a-Keto-ButyricAcid	1.00687	1.30835	0.0440813	0.218525	Control avg is higher		F06	m-Inositol	2.23441	2.69799	0.0288564	0.110809	Control avg is higher
H04	D,L-a-Hydroxy-ButyricAcid	1.76269	2.00215	0.0487064	0.218525	Control avg is higher		G05	PyruvicAcid	1.16851	1.39639	0.0262185	0.110809	Control avg is higher
H05	b-Hydroxy-ButyricAcid	2.20582	2.56429	0.0591838	0.218525	Control avg is higher		H01	AcetoaceticAcid	1.13131	1.3512	0.0275102	0.110809	Control avg is higher
H07	ButyricAcid	0.682485	0.534432	0.0398326	0.218525	Small deletion patients' avg is higher		C03	ChondroitinSulfateC	1.10597	1.42875	0.0317198	0.112781	Control avg is higher
D05	D-Fucose	1.30138	1.54573	0.0620772	0.220719	Control avg is higher		F05	Xylitol	1.89186	2.40803	0.0317198	0.112781	Control avg is higher
F03	D-Arabinose	1.77326	2.09615	0.0650867	0.223154	Control avg is higher		E01	MelibionicAcid	1.62355	1.97419	0.0332406	0.113968	Control avg is higher
A02	NegativeControl	1.96559	2.34687	0.071467	0.228695	Control avg is higher		E11	Adenosine	2.91641	2.02001	0.0364701	0.120729	Large deletion patients' avg is higher
G07	SuccinamicAcid	3.96455	4.65543	0.071467	0.228695	Control avg is higher		B03	L-Glucose	1.55881	1.96799	0.0399633	0.125441	Control avg is higher
F09	2-Aminoethanol	1.08918	1.28772	0.0819903	0.231502	Control avg is higher		C04	Mannan	1.71195	2.21492	0.0418137	0.125441	Control avg is higher
G01	TricarballylicAcid	1.47789	1.77058	0.0819903	0.231502	Control avg is higher		H08	2,3-Butanediol	1.41697	1.62796	0.0418137	0.125441	Control avg is higher
G02	L-LacticAcid(DL)	2.50462	2.89491	0.0748444	0.231502	Control avg is higher		F03	D-Arabinose	1.76123	2.09615	0.0437362	0.127233	Control avg is higher
H09	3-Hydroxy2-Butanone	1.39018	1.65445	0.0783511	0.231502	Control avg is higher		F08	1,2-Propanediol	1.98132	2.30391	0.0521888	0.147357	Control avg is higher
B03	L-Glucose	1.64946	1.96799	0.0896798	0.239146	Control avg is higher		F01	Adonitol	2.23053	2.59334	0.0593899	0.162898	Control avg is higher
C06	a-Methyl-D-Mannoside	1.07098	1.28516	0.0896798	0.239146	Control avg is higher		E12	Inosine	4.56262	3.41906	0.0673969	0.179725	Large deletion patients' avg is higher
D04	L-Fucose	1.03025	1.21148	0.0979397	0.241082	Control avg is higher		E04	a-Methyl-D-Galactoside	2.38418	2.86517	0.0702556	0.182285	Control avg is higher
D08	Stachyose	1.48335	1.69159	0.0979397	0.241082	Control avg is higher		E02	D-Melibiose	2.14415	2.53182	0.0732131	0.184959	Control avg is higher
F07	i-Erythritol	0.996638	1.17817	0.0979397	0.241082	Control avg is higher		C02	D-GlucuronicAcid	1.00168	1.25313	0.0794336	0.195529	Control avg is higher
B05	D-(+)-Glucose	5.60663	6.18129	0.102292	0.2455	Control avg is higher		G03	MethylD-Lactate	1.69076	1.92359	0.0860773	0.206585	Control avg is higher
H12	HexanoicAcid	1.39189	1.15472	0.111457	0.260972	Small deletion patients' avg is higher		B06	D-(+)-Glucose	9.21201	10.1621	0.104661	0.245059	Control avg is higher
G04	MethylPyruvate	2.54807	2.88009	0.121258	0.27716	Control avg is higher		D03	L-Rhamnose	2.38612	2.78513	0.108734	0.248536	Control avg is higher
A05	Dextrin	5.25056	6.20617	0.126405	0.282206	Control avg is higher		A03	NegativeControl	1.28919	1.48989	0.117257	0.255834	Control avg is higher
G03	MethylD-Lactate	1.67696	1.92359	0.13172	0.28739	Control avg is higher		G02	L-LacticAcid(DL)	2.55239	2.89491	0.117257	0.255834	Control avg is higher
A08	Maltotriose	3.71598	2.87103	0.148709	0.317246	Small deletion patients' avg is higher		A09	Maltose	4.68146	3.31485	0.121711	0.259651	Large deletion patients' avg is higher
C03	ChondroitinSulfateC	1.21149	1.42875	0.1739	0.362921	Control avg is higher		G04	MethylPyruvate	2.55112	2.88009	0.131015	0.273422	Control avg is higher
C04	Mannan	1.91058	2.21492	0.194792	0.397872	Control avg is higher		G06	a-Keto-GlutaricAcid	2.51006	2.8332	0.135869	0.277519	Control avg is higher
C02	D-GlucuronicAcid	1.08765	1.25313	0.217468	0.409352	Control avg is higher		E05	b-Methyl-D-Galactoside	1.98633	2.28516	0.151265	0.29043	Control avg is higher
C12	Turanose	2.23046	1.83001	0.217468	0.409352	Small deletion patients' avg is higher		G01	TricarballylicAcid	1.48646	1.77058	0.151265	0.29043	Control avg is higher
F02	L-Arabinose	1.50009	1.66322	0.217468	0.409352	Control avg is higher		G07	SuccinamicAcid	4.17599	4.65543	0.145992	0.29043	Control avg is higher
H10	PropionicAcid	1.00841	0.782779	0.209708	0.409352	Small deletion patients' avg is higher		D01	D-Tagatose	0.890808	1.06719	0.156683	0.294932	Control avg is higher
E08	Sedoheptulosan	2.30288	2.62054	0.233605	0.43127	Control avg is higher		H12	HexanoicAcid	1.26878	1.15472	0.167957	0.310074	Large deletion patients' avg is higher
F08	1,2-Propanediol	2.05854	2.30391	0.250572	0.453866	Control avg is higher		A06	Glycogen	4.71695	5.14597	0.185995	0.323899	Control avg is higher
B04	D-(+)-Glucose	12.2516	13.0955	0.268382	0.468448	Control avg is higher		C07	D-Mannitol	2.1145	2.27741	0.185995	0.323899	Control avg is higher
F05	Xylitol	2.10456	2.40803	0.268382	0.468448	Control avg is higher		E08	Sedoheptulosan	2.28238	2.62054	0.192315	0.323899	Control avg is higher
D07	D-Fructose	2.37121	2.70881	0.287042	0.483439	Control avg is higher		F04	b-Methyl-D-Xyloside	1.33162	1.5445	0.17983	0.323899	Control avg is higher
G06	a-Keto-GlutaricAcid	2.58428	2.8332	0.287042	0.483439	Control avg is higher		H09	3-Hydroxy2-Butanone	1.47376	1.65445	0.192315	0.323899	Control avg is higher
D10	Lactitol	1.29263	1.46208	0.296693	0.491078	Control avg is higher		A11	D-Cellobiose	1.85234	1.61488	0.205426	0.334252	Large deletion patients' avg is higher
D09	D-Raffinose	1.95097	2.19187	0.316639	0.51521	Control avg is higher		B10	Salicin	2.89965	2.37549	0.205426	0.334252	Large deletion patients' avg is higher
A09	Maltose	4.21071	3.31485	0.359111	0.564212	Small deletion patients' avg is higher		H11	AceticAcid	1.47633	1.27369	0.21222	0.339552	Large deletion patients' avg is higher
D11	Lactulose	1.67245	1.76769	0.370264	0.564212	Control avg is higher		G08	SuccinicAcid	2.78603	3.10853	0.219175	0.344931	Control avg is higher
G11	D-MalicAcid	1.38459	1.51572	0.370264	0.564212	Control avg is higher		A08	Maltotriose	3.54826	2.87103	0.264349	0.402818	Large deletion patients' avg is higher
H01	AcetoaceticAcid	1.22405	1.3512	0.370264	0.564212	Control avg is higher		B11	D-Sorbitol	2.01198	1.71152	0.264349	0.402818	Large deletion patients' avg is higher
B11	D-Sorbitol	1.93912	1.71152	0.38163	0.572445	Small deletion patients' avg is higher		E09	Thymidine	0.87715	0.823083	0.272462	0.408693	Large deletion patients' avg is higher
C10	Sucrose	1.41882	1.25449	0.441604	0.652215	Small deletion patients' avg is higher		A01	NegativeControl	1.33121	1.49569	0.280743	0.414636	Control avg is higher
H11	AceticAcid	1.36746	1.27369	0.454215	0.660677	Small deletion patients' avg is higher		A10	D-Trehalose	2.361	1.99104	0.289193	0.420645	Large deletion patients' avg is higher
G12	m-TartaricAcid	1.35405	1.47278	0.467028	0.669174	Control avg is higher		G09	MonoMethylSuccinate	3.31566	2.85263	0.315564	0.452152	Large deletion patients' avg is higher
F11	Glycerol	1.06222	1.16864	0.480038	0.6777	Control avg is higher		E07	Pectin	2.60606	2.26203	0.353108	0.498505	Large deletion patients' avg is higher
B10	Salicin	2.71564	2.37549	0.50664	0.704891	Small deletion patients' avg is higher		D08	Stachyose	1.56149	1.69159	0.362918	0.504929	Control avg is higher
E11	Adenosine	2.17963	2.02001	0.520226	0.713453	Small deletion patients' avg is higher		C12	Turanose	2.05223	1.83001	0.40384	0.553838	Large deletion patients' avg is higher
B12	N-Acetyl-D-Glucosamine	1.63412	1.53022	0.547951	0.730602	Small deletion patients' avg is higher		E10	Uridine	1.57449	1.44112	0.414487	0.560433	Large deletion patients' avg is higher
C05	D-Mannose	6.55086	6.74309	0.547951	0.730602	Control avg is higher		D11	Lactulose	1.67856	1.76769	0.436271	0.581695	Control avg is higher
A11	D-Cellobiose	1.7071	1.61488	0.562083	0.739177	Small deletion patients' avg is higher		F07	i-Erythritol	1.08511	1.17817	0.475934	0.624991	Control avg is higher
A07	Maltitol	1.60924	1.65043	0.605502	0.785515	Control avg is higher		F11	Glycerol	1.10814	1.16864	0.481764	0.624991	Control avg is higher
C08	N-Acetyl-D-Mannosamine	1.63861	1.5203	0.620301	0.792008	Small deletion patients' avg is higher		B12	N-Acetyl-D-Glucosamine	1.6752	1.53022	0.517508	0.662411	Large deletion patients' avg is higher
C09	D-Melezitose	1.05325	0.962936	0.635256	0.792008	Small deletion patients' avg is higher		D07	D-Fructose	2.51277	2.70881	0.542079	0.675838	Control avg is higher
C11	Palatinose	1.04899	1.09763	0.635256	0.792008	Control avg is higher		F12	CitricAcid	2.16555	1.95353	0.542079	0.675838	Large deletion patients' avg is higher
H08	2,3-Butanediol	1.55826	1.62796	0.650362	0.800445	Control avg is higher		F09	2-Aminoethanol	1.24108	1.28772	0.567217	0.698114	Control avg is higher
G10	L-MalicAcid	2.23691	2.32706	0.681002	0.827547	Control avg is higher		B07	3-MethylGlucose	1.70774	1.76609	0.60594	0.736333	Control avg is higher
B07	3-MethylGlucose	1.74171	1.76609	0.712178	0.83377	Control avg is higher		H06	g-Hydroxy-ButyricAcid	1.75969	1.79788	0.619106	0.742927	Control avg is higher
B08	a-Methyl-D-Glucoside	2.33558	2.22807	0.696526	0.83377	Small deletion patients' avg is higher		C10	Sucrose	1.31347	1.25449	0.632395	0.749505	Large deletion patients' avg is higher
E12	Inosine	3.67425	3.41906	0.712178	0.83377	Small deletion patients' avg is higher		D10	Lactitol	1.42095	1.46208	0.645804	0.756063	Control avg is higher
B09	b-Methyl-D-Glucoside	2.02331	1.92357	0.727952	0.841969	Small deletion patients' avg is higher		C08	N-Acetyl-D-Mannosamine	1.58349	1.5203	0.672966	0.769104	Large deletion patients' avg is higher
E10	Uridine	1.37034	1.44112	0.759843	0.868392	Control avg is higher		C09	D-Melezitose	1.00579	0.962936	0.672966	0.769104	Large deletion patients' avg is higher
A06	Glycogen	5.3423	5.14597	0.775947	0.872023	Small deletion patients' avg is higher		G11	D-MalicAcid	1.48783	1.51572	0.700561	0.791222	Control avg is higher
A10	D-Trehalose	2.0808	1.99104	0.808438	0.872023	Small deletion patients' avg is higher		C11	Palatinose	1.03913	1.09763	0.756921	0.844935	Control avg is higher
A12	Gentiobiose	1.10255	1.05403	0.808438	0.872023	Small deletion patients' avg is higher		A07	Maltitol	1.682	1.65043	0.800076	0.882842	Large deletion patients' avg is higher
B06	D-(+)-Glucose	10.3041	10.1621	0.792147	0.872023	Small deletion patients' avg is higher		B09	b-Methyl-D-Glucoside	1.98074	1.92357	0.858556	0.926083	Large deletion patients' avg is higher
F10	D,L-a-GlycerolPhosphate	1.48494	1.54813	0.808438	0.872023	Control avg is higher		F10	D,L-a-GlycerolPhosphate	1.61551	1.54813	0.858556	0.926083	Large deletion patients' avg is higher
D12	a-D-Lactose	1.43533	1.40264	0.857784	0.91497	Small deletion patients' avg is higher		D12	a-D-Lactose	1.38067	1.40264	0.873312	0.931533	Control avg is higher
C07	D-Mannitol	2.40515	2.27741	0.924419	0.961205	Small deletion patients' avg is higher		G10	L-MalicAcid	2.34021	2.32706	0.917824	0.968254	Large deletion patients' avg is higher
F12	CitricAcid	1.97238	1.95353	0.94118	0.961205	Small deletion patients' avg is higher		B08	a-Methyl-D-Glucoside	2.26017	2.22807	0.977552	0.987842	Large deletion patients' avg is higher
G09	MonoMethylSuccinate	2.8447	2.85263	0.94118	0.961205	Control avg is higher		D09	D-Raffinose	2.17931	2.19187	0.962595	0.987842	Control avg is higher
H06	g-Hydroxy-ButyricAcid	1.78454	1.79788	0.94118	0.961205	Control avg is higher		G12	m-TartaricAcid	1.47878	1.47278	0.977552	0.987842	Large deletion patients' avg is higher
E07	Pectin	2.30025	2.26203	0.974773	0.974773	Small deletion patients' avg is higher		H07	ButyricAcid	0.498964	0.534432	0.947651	0.987842	Control avg is higher
E09	Thymidine	0.807501	0.823083	0.974773	0.974773	Control avg is higher		A12	Gentiobiose	1.0576	1.05403	0.992516	0.992516	Large deletion patients' avg is higher

## Sheet: PM2
PM-M2 (Energy sources)
well	CMS	mean_small_deletion_p	mean_cntrl	p.value	adj_p	Note		well	CMS	mean_large_deletion_p	mean_cntrl	p.value	adj_p	Note
A02	NegativeControl	2.0912	2.23633	0.1739	0.719231	Control avg is higher		A01	NegativeControl	1.02195	1.42111	0.0029459	0.0319372	Control avg is higher
A05	Tween40	0.388493	0.429662	0.0398326	0.719231	Control avg is higher		A04	Tween20	0.343898	0.535014	0.00277078	0.0319372	Control avg is higher
A06	Tween80	0.456255	0.515675	0.111457	0.719231	Control avg is higher		A05	Tween40	0.27478	0.429662	0.00332679	0.0319372	Control avg is higher
B01	L-AsparticAcid	1.28367	1.46245	0.126405	0.719231	Control avg is higher		D01	Ala-Arg	0.962659	1.25208	0.00244874	0.0319372	Control avg is higher
D01	Ala-Arg	1.17266	1.25208	0.194792	0.719231	Control avg is higher		D07	Ala-His	0.974578	1.31318	0.0019051	0.0319372	Control avg is higher
D04	Ala-Glu	1.719	1.82917	0.160932	0.719231	Control avg is higher		D09	Ala-Leu	1.68097	2.18977	0.000993799	0.0319372	Control avg is higher
E01	Ala-Pro	1.2609	1.39974	0.126405	0.719231	Control avg is higher		E01	Ala-Pro	1.08025	1.39974	0.00230091	0.0319372	Control avg is higher
E07	Arg-Ala	1.32485	1.42809	0.0979397	0.719231	Control avg is higher		E03	Ala-Thr	0.85779	1.11676	0.00313107	0.0319372	Control avg is higher
F01	Arg-Leu	1.21618	1.30923	0.180669	0.719231	Control avg is higher		E04	Ala-Trp	1.62107	2.05893	0.0021613	0.0319372	Control avg is higher
F04	Arg-Phe	1.28314	1.41835	0.0537322	0.719231	Control avg is higher		F04	Arg-Phe	1.08333	1.41835	0.0021613	0.0319372	Control avg is higher
F05	Arg-Ser	1.56568	1.67812	0.0487064	0.719231	Control avg is higher		A02	NegativeControl	1.69046	2.23633	0.00794445	0.0423704	Control avg is higher
F06	Arg-Trp	1.28161	1.46364	0.027591	0.719231	Control avg is higher		A03	NegativeControl	1.02751	1.34791	0.00634385	0.0423704	Control avg is higher
F07	Arg-Tyr	1.17758	1.27037	0.102292	0.719231	Control avg is higher		D05	Ala-Gln	3.46362	4.4146	0.00751358	0.0423704	Control avg is higher
F08	Arg-Val	2.03947	2.17388	0.116276	0.719231	Control avg is higher		D06	Ala-Gly	1.49069	1.8881	0.00503955	0.0423704	Control avg is higher
F09	Asn-Glu	2.09719	2.22145	0.194792	0.719231	Control avg is higher		D08	Ala-Ile	1.7812	2.26225	0.00671416	0.0423704	Control avg is higher
F10	Asn-Val	1.26626	1.33362	0.1739	0.719231	Control avg is higher		E07	Arg-Ala	1.12738	1.42809	0.00710378	0.0423704	Control avg is higher
F12	Asp-Asp	1.27796	1.34253	0.0896798	0.719231	Control avg is higher		G04	Asp-Leu	1.77799	2.26939	0.00794445	0.0423704	Control avg is higher
G01	Asp-Glu	1.67795	1.79666	0.102292	0.719231	Control avg is higher		G06	Asp-Phe	1.31835	1.66084	0.00751358	0.0423704	Control avg is higher
G05	Asp-Lys	2.14409	2.26319	0.160932	0.719231	Control avg is higher		H02	Glu-Trp	0.991224	1.21744	0.00839733	0.0424286	Control avg is higher
G07	Asp-Trp	2.03361	2.12435	0.148709	0.719231	Control avg is higher		E06	Ala-Val	1.15255	1.43764	0.00989765	0.0431897	Control avg is higher
G08	Asp-Val	1.41937	1.49835	0.194792	0.719231	Control avg is higher		G01	Asp-Glu	1.44383	1.79666	0.00989765	0.0431897	Control avg is higher
G09	Glu-Ala	2.14315	2.28409	0.148709	0.719231	Control avg is higher		H04	Glu-Val	1.2482	1.58083	0.00989765	0.0431897	Control avg is higher
H01	Glu-Ser	1.43972	1.55446	0.106796	0.719231	Control avg is higher		B06	Glycine	1.5547	1.88355	0.0129337	0.0539842	Control avg is higher
H02	Glu-Trp	1.12844	1.21744	0.154729	0.719231	Control avg is higher		D03	Ala-Asp	1.83893	2.32717	0.0136315	0.0545261	Control avg is higher
H04	Glu-Val	1.51326	1.58083	0.154729	0.719231	Control avg is higher		D02	Ala-Asn	1.33299	1.67027	0.0143623	0.0551514	Control avg is higher
H12	D-(+)-Glucose	4.88105	4.06523	0.137208	0.719231	Small deletion patients' avg is higher		A06	Tween80	0.374334	0.515675	0.020517	0.0621337	Control avg is higher
A03	NegativeControl	1.27435	1.34791	0.316639	0.770366	Control avg is higher		A08	L-Alaninamide	0.959797	1.17041	0.0176426	0.0621337	Control avg is higher
A04	Tween20	0.560108	0.535014	0.287042	0.770366	Small deletion patients' avg is higher		C05	L-Serine	1.22057	1.48582	0.0226529	0.0621337	Control avg is higher
C06	D-Serine	1.48401	1.47699	0.370264	0.770366	Small deletion patients' avg is higher		C06	D-Serine	1.20532	1.47699	0.020517	0.0621337	Control avg is higher
C08	D-Threonine	1.30718	1.3629	0.306559	0.770366	Control avg is higher		D11	Ala-Met	1.71728	2.05747	0.020517	0.0621337	Control avg is higher
D03	Ala-Asp	2.21323	2.32717	0.306559	0.770366	Control avg is higher		D12	Ala-Phe	1.1933	1.37882	0.0226511	0.0621337	Control avg is higher
D06	Ala-Gly	1.81217	1.8881	0.381623	0.770366	Control avg is higher		F05	Arg-Ser	1.37824	1.67812	0.0226529	0.0621337	Control avg is higher
D09	Ala-Leu	2.08496	2.18977	0.370264	0.770366	Control avg is higher		F11	Asp-Ala	1.49513	1.80459	0.0215619	0.0621337	Control avg is higher
D12	Ala-Phe	1.35581	1.37882	0.393208	0.770366	Control avg is higher		G02	Asp-Gln	3.38176	4.10772	0.020517	0.0621337	Control avg is higher
E03	Ala-Thr	1.05828	1.11676	0.277605	0.770366	Control avg is higher		G05	Asp-Lys	1.84528	2.26319	0.0185589	0.0621337	Control avg is higher
E04	Ala-Trp	1.91404	2.05893	0.306559	0.770366	Control avg is higher		F01	Arg-Leu	1.09977	1.30923	0.0237915	0.0634441	Control avg is higher
E06	Ala-Val	1.36924	1.43764	0.38163	0.770366	Control avg is higher		B02	D-AsparticAcid	1.74623	2.15402	0.0275102	0.0644141	Control avg is higher
E08	Arg-Arg	1.58645	1.60426	0.370264	0.770366	Control avg is higher		B03	L-GlutamicAcid	2.02677	2.49304	0.0249795	0.0644141	Control avg is higher
E12	Arg-Ile	1.78274	1.74524	0.359111	0.770366	Small deletion patients' avg is higher		B07	L-Histidine	1.10793	1.34155	0.0275102	0.0644141	Control avg is higher
F02	Arg-Lys	1.48221	1.4881	0.241984	0.770366	Control avg is higher		C08	D-Threonine	1.12765	1.3629	0.0262185	0.0644141	Control avg is higher
F03	Arg-Met	2.9661	3.20349	0.217468	0.770366	Control avg is higher		G08	Asp-Val	1.24203	1.49835	0.0275102	0.0644141	Control avg is higher
F11	Asp-Ala	1.70106	1.80459	0.225433	0.770366	Control avg is higher		G09	Glu-Ala	1.89335	2.28409	0.0332406	0.0759786	Control avg is higher
G03	Asp-Gly	2.60721	2.65679	0.393208	0.770366	Control avg is higher		D10	Ala-Lys	1.12884	1.36985	0.0348234	0.0777453	Control avg is higher
G04	Asp-Leu	2.17514	2.26939	0.326935	0.770366	Control avg is higher		B01	L-AsparticAcid	1.23473	1.46245	0.0364701	0.0782954	Control avg is higher
G06	Asp-Phe	1.59306	1.66084	0.233605	0.770366	Control avg is higher		C07	L-Threonine	1.67147	2.04256	0.0399633	0.0782954	Control avg is higher
G11	Glu-Glu	1.39057	1.44857	0.306559	0.770366	Control avg is higher		D04	Ala-Glu	1.48746	1.82917	0.0381828	0.0782954	Control avg is higher
H08	Gly-Ala	1.42223	1.48079	0.250572	0.770366	Control avg is higher		F03	Arg-Met	2.69421	3.20349	0.0399633	0.0782954	Control avg is higher
H10	Gly-Asn	1.09157	1.09133	0.337446	0.770366	Small deletion patients' avg is higher		F07	Arg-Tyr	1.06149	1.27037	0.0399633	0.0782954	Control avg is higher
H11	Gly-Asp	1.4761	1.54246	0.287042	0.770366	Control avg is higher		H05	Gln-Glu	2.11576	2.53468	0.0399633	0.0782954	Control avg is higher
B03	L-GlutamicAcid	2.461	2.49304	0.429195	0.7708	Control avg is higher		E05	Ala-Tyr	1.56449	1.89004	0.0418138	0.0802824	Control avg is higher
B08	L-Homoserine	1.63369	1.43482	0.441604	0.7708	Small deletion patients' avg is higher		C03	L-Phenylalanine	1.4377	1.76002	0.0457328	0.0860854	Control avg is higher
B10	L-Isoleucine	2.04233	2.00327	0.441604	0.7708	Small deletion patients' avg is higher		F02	Arg-Lys	1.27739	1.4881	0.0478057	0.0882567	Control avg is higher
C02	L-Ornithine	1.52107	1.55079	0.404995	0.7708	Control avg is higher		C01	L-Methionine	2.64529	3.00672	0.0499569	0.0904881	Control avg is higher
D08	Ala-Ile	2.16335	2.26225	0.441604	0.7708	Control avg is higher		G07	Asp-Trp	1.81061	2.12435	0.0545034	0.0968949	Control avg is higher
E11	Arg-Glu	1.7875	1.80674	0.441604	0.7708	Control avg is higher		G11	Glu-Glu	1.25631	1.44857	0.0593899	0.101811	Control avg is higher
B02	D-AsparticAcid	2.08612	2.15402	0.467021	0.772023	Control avg is higher		H03	Glu-Tyr	1.83293	2.15983	0.0593899	0.101811	Control avg is higher
B09	Hydroxy-L-Proline	2.07031	2.02852	0.493243	0.772023	Small deletion patients' avg is higher		F10	Asn-Val	1.13532	1.33362	0.0619663	0.104364	Control avg is higher
B12	L-Lysine	1.73746	1.71891	0.467028	0.772023	Small deletion patients' avg is higher		H09	Gly-Arg	0.805196	0.912738	0.0646345	0.106981	Control avg is higher
D07	Ala-His	1.31242	1.31318	0.50664	0.772023	Control avg is higher		C04	L-Proline	2.20486	2.63205	0.0673969	0.107835	Control avg is higher
D10	Ala-Lys	1.32358	1.36985	0.50664	0.772023	Control avg is higher		H08	Gly-Ala	1.27983	1.48079	0.0673969	0.107835	Control avg is higher
E05	Ala-Tyr	1.88125	1.89004	0.493243	0.772023	Control avg is higher		A10	D-Alanine	0.938791	1.06904	0.0860773	0.129116	Control avg is higher
E09	Arg-Asp	1.4408	1.46292	0.480038	0.772023	Control avg is higher		B04	D-GlutamicAcid	1.74048	2.08845	0.0860773	0.129116	Control avg is higher
G10	Glu-Asp	2.24957	2.27909	0.467028	0.772023	Control avg is higher		F06	Arg-Trp	1.24441	1.46364	0.0860773	0.129116	Control avg is higher
D05	Ala-Gln	4.08464	4.4146	0.520226	0.78034	Control avg is higher		F08	Arg-Val	1.87427	2.17388	0.0860773	0.129116	Control avg is higher
D02	Ala-Asn	1.65418	1.67027	0.547951	0.809282	Control avg is higher		A09	L-Alanine	1.46144	1.62274	0.0931628	0.137594	Control avg is higher
H05	Gln-Glu	2.41236	2.53468	0.562083	0.817575	Control avg is higher		G03	Asp-Gly	2.25849	2.65679	0.0968771	0.140912	Control avg is higher
A07	Gelatin	1.4023	1.27155	0.576388	0.825869	Small deletion patients' avg is higher		F09	Asn-Glu	1.92206	2.22145	0.100709	0.144299	Control avg is higher
C03	L-Phenylalanine	1.77789	1.76002	0.605502	0.842437	Small deletion patients' avg is higher		B09	Hydroxy-L-Proline	1.76353	2.02852	0.108734	0.153507	Control avg is higher
H06	Gln-Gln	2.69995	2.5902	0.605502	0.842437	Small deletion patients' avg is higher		H01	Glu-Ser	1.34411	1.55446	0.117257	0.163141	Control avg is higher
A08	L-Alaninamide	1.17005	1.17041	0.696526	0.879822	Control avg is higher		G10	Glu-Asp	1.98823	2.27909	0.131015	0.179677	Control avg is higher
A11	L-Arginine	0.967038	0.976276	0.696526	0.879822	Control avg is higher		C02	L-Ornithine	1.37597	1.55079	0.135869	0.18371	Control avg is higher
A12	L-Asparagine	1.07545	1.05854	0.665612	0.879822	Small deletion patients' avg is higher		C12	Ala-Ala	1.42582	1.60669	0.145992	0.194656	Control avg is higher
B07	L-Histidine	1.38388	1.34155	0.681002	0.879822	Small deletion patients' avg is higher		B12	L-Lysine	1.55364	1.71891	0.151265	0.198924	Control avg is higher
C04	L-Proline	2.66767	2.63205	0.681002	0.879822	Small deletion patients' avg is higher		A11	L-Arginine	0.869909	0.976276	0.167957	0.212156	Control avg is higher
C07	L-Threonine	2.02096	2.04256	0.681002	0.879822	Control avg is higher		B05	L-Glutamine	3.46979	4.00709	0.167957	0.212156	Control avg is higher
H03	Glu-Tyr	2.14741	2.15983	0.681002	0.879822	Control avg is higher		E02	Ala-Ser	1.68238	2.02402	0.167957	0.212156	Control avg is higher
C05	L-Serine	1.51779	1.48582	0.712178	0.88791	Small deletion patients' avg is higher		A07	Gelatin	1.13111	1.27155	0.205426	0.256115	Control avg is higher
A09	L-Alanine	1.71023	1.62274	0.759843	0.923354	Small deletion patients' avg is higher		H11	Gly-Asp	1.4462	1.54246	0.226292	0.278513	Control avg is higher
G12	Glu-Gly	1.45115	1.42768	0.759843	0.923354	Small deletion patients' avg is higher		A12	L-Asparagine	1.03477	1.05854	0.280743	0.341156	Control avg is higher
C01	L-Methionine	3.14587	3.00672	0.792147	0.950577	Small deletion patients' avg is higher		B08	L-Homoserine	1.31412	1.43482	0.306604	0.358951	Control avg is higher
H07	Gln-Gly	2.09753	1.96009	0.808438	0.958149	Small deletion patients' avg is higher		E08	Arg-Arg	1.47958	1.60426	0.306604	0.358951	Control avg is higher
C09	L-Tryptophan	1.46651	1.39353	0.841263	0.968791	Small deletion patients' avg is higher		E09	Arg-Asp	1.29348	1.46292	0.306604	0.358951	Control avg is higher
C11	L-Valine	2.0947	2.04109	0.841263	0.968791	Small deletion patients' avg is higher		C11	L-Valine	1.83394	2.04109	0.324695	0.375551	Control avg is higher
E10	Arg-Gln	2.42626	2.33445	0.857784	0.968791	Small deletion patients' avg is higher		H06	Gln-Gln	2.4919	2.5902	0.362918	0.414763	Control avg is higher
H09	Gly-Arg	0.971455	0.912738	0.857784	0.968791	Small deletion patients' avg is higher		B10	L-Isoleucine	1.85385	2.00327	0.40384	0.456102	Control avg is higher
B06	Glycine	2.04524	1.88355	0.891005	0.972006	Small deletion patients' avg is higher		E11	Arg-Glu	1.66958	1.80674	0.414487	0.457365	Control avg is higher
D11	Ala-Met	1.99492	2.05747	0.891005	0.972006	Control avg is higher		F12	Asp-Asp	1.25126	1.34253	0.414487	0.457365	Control avg is higher
E02	Ala-Ser	2.08891	2.02402	0.891005	0.972006	Small deletion patients' avg is higher		H12	D-(+)-Glucose	4.49214	4.06523	0.436271	0.475932	Large deletion patients' avg is higher
A10	D-Alanine	1.1123	1.06904	0.907692	0.979084	Small deletion patients' avg is higher		E12	Arg-Ile	1.68273	1.74524	0.60594	0.653599	Control avg is higher
A01	NegativeControl	1.43861	1.42111	0.924419	0.982101	Small deletion patients' avg is higher		B11	L-Leucine	1.56196	1.65515	0.645804	0.688402	Control avg is higher
B11	L-Leucine	1.77811	1.65515	0.94118	0.982101	Small deletion patients' avg is higher		C10	L-Tyrosine	1.26728	1.33616	0.652548	0.688402	Control avg is higher
G02	Asp-Gln	4.12663	4.10772	0.94118	0.982101	Small deletion patients' avg is higher		H07	Gln-Gly	1.98326	1.96009	0.84385	0.880539	Large deletion patients' avg is higher
C10	L-Tyrosine	1.42562	1.33616	0.957967	0.988869	Small deletion patients' avg is higher		H10	Gly-Asn	1.09786	1.09133	0.873312	0.901483	Large deletion patients' avg is higher
B04	D-GlutamicAcid	2.16765	2.08845	0.99159	0.99159	Small deletion patients' avg is higher		C09	L-Tryptophan	1.3627	1.39353	0.902951	0.922163	Control avg is higher
B05	L-Glutamine	3.88287	4.00709	0.974773	0.99159	Control avg is higher		E10	Arg-Gln	2.37681	2.33445	0.917824	0.927485	Large deletion patients' avg is higher
C12	Ala-Ala	1.66321	1.60669	0.99159	0.99159	Small deletion patients' avg is higher		G12	Glu-Gly	1.41028	1.42768	0.962595	0.962595	Control avg is higher

## Sheet: PM3
PM-M3 (Energy sources)
well	CMS	mean_small_deletion_p	mean_cntrl	p.value	adj_p	Note		well	CMS	mean_large_deletion_p	mean_cntrl	p.value	adj_p	Note
A02	NegativeControl	1.55126	1.78791	0.121258	0.225806	Control avg is higher		C06	Ile-Ala	1.09383	1.39927	0.0021613	0.079843	Control avg is higher
A03	NegativeControl	1.39141	1.60362	0.0896798	0.225806	Control avg is higher		F01	Lys-Ala	0.985817	1.309	0.0029459	0.079843	Control avg is higher
A05	Gly-His	1.30394	1.48371	0.111457	0.225806	Control avg is higher		F02	Lys-Arg	1.64742	2.31951	0.0029459	0.079843	Control avg is higher
A07	Gly-Leu	1.79824	2.06999	0.126405	0.225806	Control avg is higher		E06	Leu-Met	1.20639	1.52218	0.00332679	0.079843	Control avg is higher
A08	Gly-Lys	1.04762	1.27377	0.0398326	0.225806	Control avg is higher		C02	His-Ser	0.958368	1.24574	0.00534064	0.0852453	Control avg is higher
A10	Gly-Phe	1.33381	1.56774	0.0591838	0.225806	Control avg is higher		A01	NegativeControl	1.56547	1.95887	0.00634385	0.0852453	Control avg is higher
A11	Gly-Pro	1.1683	1.34499	0.0937368	0.225806	Control avg is higher		C04	His-Tyr	1.65825	2.29372	0.00671416	0.0852453	Control avg is higher
A12	Gly-Ser	1.36068	1.55828	0.0511676	0.225806	Control avg is higher		C03	His-Trp	1.10784	1.40877	0.00710378	0.0852453	Control avg is higher
B01	Gly-Thr	1.14093	1.47579	0.00428218	0.225806	Control avg is higher		F03	Lys-Asp	1.89906	2.51164	0.0116323	0.114899	Control avg is higher
B02	Gly-Trp	1.42978	1.65177	0.106796	0.225806	Control avg is higher		C05	His-Val	1.31153	1.65562	0.0136315	0.114899	Control avg is higher
B03	Gly-Tyr	1.49331	1.77547	0.126405	0.225806	Control avg is higher		E03	Leu-His	1.34516	1.6933	0.0136315	0.114899	Control avg is higher
B05	His-Ala	1.80827	2.07771	0.13172	0.225806	Control avg is higher		C01	His-Pro	1.41535	1.75186	0.0143623	0.114899	Control avg is higher
B06	His-Asp	1.91865	2.2113	0.111457	0.225806	Control avg is higher		D05	Ile-Ser	1.02292	1.2424	0.0159284	0.117625	Control avg is higher
B07	His-Glu	1.38372	1.59477	0.111457	0.225806	Control avg is higher		A10	Gly-Phe	1.28246	1.56774	0.020517	0.120044	Control avg is higher
C01	His-Pro	1.51696	1.75186	0.0682156	0.225806	Control avg is higher		D02	Ile-Met	1.94714	2.27954	0.020517	0.120044	Control avg is higher
C03	His-Trp	1.20344	1.40877	0.0896798	0.225806	Control avg is higher		D09	Leu-Ala	1.57978	1.92794	0.0215619	0.120044	Control avg is higher
C04	His-Tyr	1.8621	2.29372	0.0783511	0.225806	Control avg is higher		H02	Met-Met	1.59939	1.85906	0.0249795	0.120044	Control avg is higher
C05	His-Val	1.40622	1.65562	0.106796	0.225806	Control avg is higher		B05	His-Ala	1.6821	2.07771	0.0262185	0.120044	Control avg is higher
C06	Ile-Ala	1.13218	1.39927	0.0247542	0.225806	Control avg is higher		A08	Gly-Lys	1.05697	1.27377	0.0275102	0.120044	Control avg is higher
C07	Ile-Arg	2.05139	2.34881	0.0419114	0.225806	Control avg is higher		B01	Gly-Thr	1.23331	1.47579	0.0275102	0.120044	Control avg is higher
C08	Ile-Asn	1.69166	2.03422	0.0187418	0.225806	Control avg is higher		E07	Leu-Phe	1.64468	1.98258	0.0275102	0.120044	Control avg is higher
D01	Ile-Leu	1.26515	1.42927	0.0979397	0.225806	Control avg is higher		F10	Lys-Phe	1.81788	2.26973	0.0275102	0.120044	Control avg is higher
D04	Ile-Pro	1.21762	1.44975	0.0487064	0.225806	Control avg is higher		D04	Ile-Pro	1.2052	1.44975	0.0288564	0.120444	Control avg is higher
D05	Ile-Ser	1.08157	1.2424	0.102292	0.225806	Control avg is higher		H05	Met-Thr	1.93361	2.23217	0.0317198	0.122735	Control avg is higher
D06	Ile-Trp	2.13153	2.4944	0.0682156	0.225806	Control avg is higher		D01	Ile-Leu	1.18623	1.42927	0.0332406	0.122735	Control avg is higher
D07	Ile-Tyr	1.74591	2.00107	0.129036	0.225806	Control avg is higher		E08	Leu-Pro	1.33994	1.6228	0.0332406	0.122735	Control avg is higher
D09	Leu-Ala	1.60826	1.92794	0.0341136	0.225806	Control avg is higher		H04	Met-Pro	2.39017	2.7743	0.0381828	0.135761	Control avg is higher
D12	Leu-Asp	1.88597	2.10379	0.116276	0.225806	Control avg is higher		G05	Met-Arg	3.43546	4.13699	0.0437362	0.149953	Control avg is higher
E02	Leu-Gly	1.67351	1.9196	0.116276	0.225806	Control avg is higher		E09	Leu-Ser	1.30954	1.5512	0.056903	0.174868	Control avg is higher
E03	Leu-His	1.44159	1.6933	0.0896751	0.225806	Control avg is higher		G09	Met-Gly	1.80762	2.08887	0.0581321	0.174868	Control avg is higher
E05	Leu-Leu	1.2738	1.51861	0.0511676	0.225806	Control avg is higher		D11	Leu-Asn	1.30712	1.52197	0.0593899	0.174868	Control avg is higher
E06	Leu-Met	1.32206	1.52218	0.126405	0.225806	Control avg is higher		G10	Met-His	2.9395	3.40022	0.0593899	0.174868	Control avg is higher
E07	Leu-Phe	1.68637	1.98258	0.0591838	0.225806	Control avg is higher		A05	Gly-His	1.24033	1.48371	0.0619663	0.174868	Control avg is higher
E08	Leu-Pro	1.39623	1.6228	0.13172	0.225806	Control avg is higher		F09	Lys-Met	2.76281	3.20323	0.0646345	0.174868	Control avg is higher
F01	Lys-Ala	1.09937	1.309	0.0187418	0.225806	Control avg is higher		C10	Ile-Gly	1.81585	2.12897	0.0673969	0.174868	Control avg is higher
F02	Lys-Arg	1.86088	2.31951	0.00674827	0.225806	Control avg is higher		G01	Lys-Thr	1.12961	1.32045	0.0673969	0.174868	Control avg is higher
F03	Lys-Asp	2.19256	2.51164	0.0896798	0.225806	Control avg is higher		G06	Met-Asp	1.88627	2.23956	0.0673969	0.174868	Control avg is higher
F05	Lys-Gly	2.19664	2.60707	0.0463453	0.225806	Control avg is higher		D06	Ile-Trp	2.13826	2.4944	0.0732131	0.175475	Control avg is higher
F06	Lys-Ile	2.22343	2.6052	0.0398326	0.225806	Control avg is higher		D08	Ile-Val	1.32412	1.51708	0.0732131	0.175475	Control avg is higher
F07	Lys-Leu	1.173	1.36063	0.071467	0.225806	Control avg is higher		A02	NegativeControl	1.51921	1.78791	0.0762717	0.175475	Control avg is higher
F09	Lys-Met	2.71725	3.20323	0.0819903	0.225806	Control avg is higher		C07	Ile-Arg	2.04975	2.34881	0.0762717	0.175475	Control avg is higher
F10	Lys-Phe	1.84569	2.26973	0.0398326	0.225806	Control avg is higher		E05	Leu-Leu	1.26776	1.51861	0.0794337	0.175475	Control avg is higher
F11	Lys-Pro	1.93093	2.22677	0.106796	0.225806	Control avg is higher		G11	Met-Ile	2.28943	2.57406	0.0827014	0.175475	Control avg is higher
G01	Lys-Thr	1.11521	1.32045	0.0307039	0.225806	Control avg is higher		C08	Ile-Asn	1.79403	2.03422	0.0860773	0.175475	Control avg is higher
G02	Lys-Trp	2.16767	2.48941	0.0896798	0.225806	Control avg is higher		D03	Ile-Phe	1.28559	1.48239	0.0860773	0.175475	Control avg is higher
G03	Lys-Tyr	2.75734	3.33946	0.0537322	0.225806	Control avg is higher		E04	Leu-Ile	2.21596	2.61293	0.0860773	0.175475	Control avg is higher
G04	Lys-Val	2.14593	2.45972	0.106796	0.225806	Control avg is higher		H09	Phe-Ala	1.14199	1.33007	0.0860773	0.175475	Control avg is higher
G05	Met-Arg	3.53696	4.13699	0.071467	0.225806	Control avg is higher		F05	Lys-Gly	2.19902	2.60707	0.0895636	0.175475	Control avg is higher
G06	Met-Asp	1.90699	2.23956	0.106796	0.225806	Control avg is higher		A07	Gly-Leu	1.7534	2.06999	0.0931628	0.175475	Control avg is higher
G08	Met-Glu	2.13453	2.48996	0.071467	0.225806	Control avg is higher		B08	His-Gly	1.89369	2.18241	0.0931628	0.175475	Control avg is higher
G09	Met-Gly	1.78225	2.08887	0.116276	0.225806	Control avg is higher		A11	Gly-Pro	1.20431	1.34499	0.0968771	0.175475	Control avg is higher
G10	Met-His	2.91152	3.40022	0.106796	0.225806	Control avg is higher		B06	His-Asp	1.85889	2.2113	0.0968771	0.175475	Control avg is higher
G11	Met-Ile	2.25333	2.57406	0.0783511	0.225806	Control avg is higher		B12	His-Met	1.99996	2.2718	0.0968771	0.175475	Control avg is higher
H02	Met-Met	1.57685	1.85906	0.0682156	0.225806	Control avg is higher		A09	Gly-Met	1.42346	1.59104	0.100709	0.175783	Control avg is higher
H04	Met-Pro	2.4633	2.7743	0.126405	0.225806	Control avg is higher		H03	Met-Phe	2.45711	2.78545	0.100709	0.175783	Control avg is higher
H11	Phe-Glu	1.74542	1.95622	0.116276	0.225806	Control avg is higher		B02	Gly-Trp	1.44714	1.65177	0.104661	0.179418	Control avg is higher
B04	Gly-Val	1.74819	1.98748	0.148709	0.237934	Control avg is higher		B04	Gly-Val	1.70167	1.98748	0.112932	0.190202	Control avg is higher
E04	Leu-Ile	2.30923	2.61293	0.148709	0.237934	Control avg is higher		E10	Leu-Trp	2.14328	2.37393	0.121711	0.195555	Control avg is higher
E11	Leu-Tyr	1.81271	2.051	0.142869	0.237934	Control avg is higher		A03	NegativeControl	1.38033	1.60362	0.126296	0.195555	Control avg is higher
F08	Lys-Lys	1.35509	1.56059	0.148709	0.237934	Control avg is higher		D07	Ile-Tyr	1.74549	2.00107	0.126296	0.195555	Control avg is higher
D08	Ile-Val	1.33434	1.51708	0.154729	0.23958	Control avg is higher		G03	Lys-Tyr	2.86001	3.33946	0.126296	0.195555	Control avg is higher
H12	D-(+)-Glucose	6.92797	6.18851	0.154729	0.23958	Small deletion patients' avg is higher		G04	Lys-Val	2.13285	2.45972	0.126296	0.195555	Control avg is higher
B10	His-Leu	1.4941	1.68329	0.167322	0.247121	Control avg is higher		F08	Lys-Lys	1.36076	1.56059	0.131015	0.199641	Control avg is higher
D11	Leu-Asn	1.34523	1.52197	0.167322	0.247121	Control avg is higher		A06	Gly-Ile	1.44946	1.63145	0.145992	0.218988	Control avg is higher
H06	Met-Trp	1.62778	1.84745	0.167322	0.247121	Control avg is higher		A04	Gly-Gly	1.68286	1.91818	0.156683	0.224501	Control avg is higher
E09	Leu-Ser	1.3341	1.5512	0.1739	0.252945	Control avg is higher		E02	Leu-Gly	1.67677	1.9196	0.156683	0.224501	Control avg is higher
D02	Ile-Met	2.03648	2.27954	0.180669	0.258869	Control avg is higher		F11	Lys-Pro	1.9941	2.22677	0.156683	0.224501	Control avg is higher
E10	Leu-Trp	2.07695	2.37393	0.187632	0.261054	Control avg is higher		D12	Leu-Asp	1.86495	2.10379	0.205426	0.286945	Control avg is higher
H08	Met-Val	1.61694	1.83722	0.187632	0.261054	Control avg is higher		A12	Gly-Ser	1.39491	1.55828	0.21222	0.286945	Control avg is higher
A04	Gly-Gly	1.68859	1.91818	0.202149	0.273329	Control avg is higher		B10	His-Leu	1.4984	1.68329	0.21222	0.286945	Control avg is higher
C10	Ile-Gly	1.90021	2.12897	0.202149	0.273329	Control avg is higher		G08	Met-Glu	2.19849	2.48996	0.21222	0.286945	Control avg is higher
B12	His-Met	1.98857	2.2718	0.217468	0.285986	Control avg is higher		E11	Leu-Tyr	1.82311	2.051	0.215671	0.287562	Control avg is higher
G07	Met-Gln	3.86267	4.2914	0.217468	0.285986	Control avg is higher		C11	Ile-His	1.74926	1.94698	0.219175	0.28823	Control avg is higher
B11	His-Lys	1.56759	1.71599	0.225433	0.292454	Control avg is higher		F04	Lys-Glu	1.70276	1.90719	0.226292	0.293568	Control avg is higher
B08	His-Gly	1.99505	2.18241	0.233605	0.29508	Control avg is higher		G02	Lys-Trp	2.29372	2.48941	0.233572	0.298973	Control avg is higher
F04	Lys-Glu	1.68414	1.90719	0.233605	0.29508	Control avg is higher		B11	His-Lys	1.54458	1.71599	0.241017	0.304443	Control avg is higher
C02	His-Ser	1.13065	1.24574	0.241984	0.301694	Control avg is higher		F07	Lys-Leu	1.19152	1.36063	0.248628	0.309978	Control avg is higher
H09	Phe-Ala	1.17699	1.33007	0.268382	0.330316	Control avg is higher		B03	Gly-Tyr	1.56783	1.77547	0.256405	0.311581	Control avg is higher
A01	NegativeControl	1.83174	1.95887	0.326935	0.397288	Control avg is higher		F12	Lys-Ser	1.47269	1.6371	0.256405	0.311581	Control avg is higher
C11	Ile-His	1.80386	1.94698	0.332157	0.398588	Control avg is higher		H06	Met-Trp	1.70571	1.84745	0.280743	0.336892	Control avg is higher
D10	Leu-Arg	1.80235	1.8972	0.370264	0.438832	Control avg is higher		D10	Leu-Arg	1.76408	1.8972	0.297814	0.352964	Control avg is higher
G12	Met-Leu	2.08149	2.25724	0.38163	0.446786	Control avg is higher		G07	Met-Gln	4.12934	4.2914	0.343467	0.402107	Control avg is higher
A06	Gly-Ile	1.53264	1.63145	0.393208	0.44938	Control avg is higher		G12	Met-Leu	2.11078	2.25724	0.362918	0.41976	Control avg is higher
A09	Gly-Met	1.46696	1.59104	0.393208	0.44938	Control avg is higher		E01	Leu-Glu	1.60199	1.75311	0.393359	0.444264	Control avg is higher
F12	Lys-Ser	1.46654	1.6371	0.416992	0.460129	Control avg is higher		H11	Phe-Glu	1.81425	1.95622	0.393359	0.444264	Control avg is higher
H03	Met-Phe	2.58964	2.78545	0.416992	0.460129	Control avg is higher		H10	Phe-Asp	1.25023	1.38217	0.40384	0.450798	Control avg is higher
H10	Phe-Asp	1.27467	1.38217	0.416992	0.460129	Control avg is higher		H08	Met-Val	1.69031	1.83722	0.414487	0.457365	Control avg is higher
E12	Leu-Val	1.59835	1.73193	0.454215	0.495508	Control avg is higher		E12	Leu-Val	1.63332	1.73193	0.436271	0.475932	Control avg is higher
C12	Ile-Ile	1.47523	1.54393	0.467028	0.498163	Control avg is higher		B07	His-Glu	1.4082	1.59477	0.458701	0.494779	Control avg is higher
H05	Met-Thr	2.08637	2.23217	0.467028	0.498163	Control avg is higher		F06	Lys-Ile	2.39792	2.6052	0.542079	0.578217	Control avg is higher
D03	Ile-Phe	1.39108	1.48239	0.480038	0.506413	Control avg is higher		H07	Met-Tyr	5.20592	2.66887	0.579993	0.611861	Large deletion patients' avg is higher
E01	Leu-Glu	1.63231	1.75311	0.562083	0.586521	Control avg is higher		H01	Met-Lys	1.81034	1.83456	0.645804	0.673882	Control avg is higher
H07	Met-Tyr	2.53493	2.66887	0.576388	0.594981	Control avg is higher		B09	His-His	2.47942	2.55304	0.700561	0.715467	Control avg is higher
B09	His-His	2.56553	2.55304	0.874367	0.883571	Small deletion patients' avg is higher		H12	D-(+)-Glucose	6.58357	6.18851	0.700561	0.715467	Large deletion patients' avg is higher
H01	Met-Lys	1.8073	1.83456	0.874367	0.883571	Control avg is higher		C12	Ile-Ile	1.50923	1.54393	0.814605	0.82318	Control avg is higher
C09	Ile-Gln	1.96103	1.93418	0.924419	0.924419	Small deletion patients' avg is higher		C09	Ile-Gln	2.05	1.93418	0.858556	0.858556	Large deletion patients' avg is higher

## Sheet: PM4
PM-M4 (Energy sources)
well	CMS	mean_small_deletion_p	mean_cntrl	p.value	adj_p	Note		well	CMS	mean_large_deletion_p	mean_cntrl	p.value	adj_p	Note
A06	Phe-Met	1.33625	1.80715	0.00201145	0.079498	Control avg is higher		B09	Pro-lle	2.10258	2.7726	0.00202949	0.169369	Control avg is higher
C08	Ser-Asp	1.53707	2.00321	0.00140365	0.079498	Control avg is higher		H05	Val-Lys	1.61005	2.0446	0.00599137	0.169369	Control avg is higher
C11	Ser-Gly	1.15384	1.54271	0.00248431	0.079498	Control avg is higher		A08	Phe-Pro	1.60586	1.99032	0.00937292	0.169369	Control avg is higher
A03	NegativeControl	1.294	1.56623	0.00867278	0.0796807	Control avg is higher		H07	Val-Phe	1.87284	2.37292	0.00989765	0.169369	Control avg is higher
A04	Phe-Gly	1.29987	1.6825	0.0110737	0.0796807	Control avg is higher		H02	Val-His	1.74247	2.25625	0.0110262	0.169369	Control avg is higher
A07	Phe-Phe	1.46069	1.74083	0.0323703	0.0796807	Control avg is higher		E01	Thr-Gly	1.28567	1.56099	0.0136315	0.169369	Control avg is higher
A08	Phe-Pro	1.58841	1.99032	0.0177061	0.0796807	Control avg is higher		A01	NegativeControl	1.45849	1.76744	0.0143623	0.169369	Control avg is higher
A09	Phe-Ser	1.30872	1.66927	0.00815047	0.0796807	Control avg is higher		H03	Val-Ile	1.75737	2.18801	0.0143623	0.169369	Control avg is higher
A10	Phe-Trp	1.58219	1.84128	0.0323703	0.0796807	Control avg is higher		B10	Pro-Leu	1.73164	2.043	0.0176426	0.169369	Control avg is higher
A11	Phe-Tyr	1.84676	2.38843	0.015784	0.0796807	Control avg is higher		C09	Ser-Glu	1.99404	2.37125	0.0176426	0.169369	Control avg is higher
B03	Pro-Asn	2.20021	2.65117	0.0234331	0.0796807	Control avg is higher		B08	Pro-Hyp	2.19603	2.58598	0.020517	0.179057	Control avg is higher
B05	Pro-Glu	1.54808	1.85876	0.027591	0.0796807	Control avg is higher		D01	Ser-Leu	1.34224	1.59321	0.0249795	0.184139	Control avg is higher
B07	Pro-Gly	2.45904	3.00117	0.0234331	0.0796807	Control avg is higher		D11	Thr-Glu	1.90494	2.21366	0.0249795	0.184139	Control avg is higher
B08	Pro-Hyp	2.13796	2.58598	0.0291116	0.0796807	Control avg is higher		H04	Val-Leu	1.68014	2.09008	0.0268536	0.184139	Control avg is higher
B09	Pro-lle	2.22138	2.7726	0.0198302	0.0796807	Control avg is higher		H09	Val-Ser	1.42342	1.72242	0.0381828	0.229812	Control avg is higher
B10	Pro-Leu	1.69865	2.043	0.0221736	0.0796807	Control avg is higher		E10	Trp-Glu	2.30611	2.83661	0.0399633	0.229812	Control avg is higher
C01	Pro-Pro	1.34036	1.66795	0.0132448	0.0796807	Control avg is higher		A03	NegativeControl	1.39667	1.56623	0.0437362	0.229812	Control avg is higher
C02	Pro-Ser	1.09179	1.3634	0.015784	0.0796807	Control avg is higher		A04	Phe-Gly	1.31306	1.6825	0.0437362	0.229812	Control avg is higher
C03	Pro-Trp	2.09135	2.53233	0.0110737	0.0796807	Control avg is higher		A09	Phe-Ser	1.43495	1.66927	0.0457328	0.229812	Control avg is higher
C04	Pro-Tyr	2.57078	3.09356	0.0221736	0.0796807	Control avg is higher		A05	Phe-Ile	1.33453	1.54339	0.0499569	0.229812	Control avg is higher
C05	Pro-Val	2.23157	2.68951	0.015784	0.0796807	Control avg is higher		B03	Pro-Asn	2.30131	2.65117	0.0545034	0.229812	Control avg is higher
C06	Ser-Ala	1.134	1.37681	0.0291116	0.0796807	Control avg is higher		D04	Ser-Pro	2.01742	2.3164	0.0593899	0.229812	Control avg is higher
C09	Ser-Glu	1.96264	2.37125	0.0187418	0.0796807	Control avg is higher		A07	Phe-Phe	1.52198	1.74083	0.0619663	0.229812	Control avg is higher
D01	Ser-Leu	1.33713	1.59321	0.0307039	0.0796807	Control avg is higher		C08	Ser-Asp	1.74044	2.00321	0.0619663	0.229812	Control avg is higher
D06	Ser-Tyr	1.6609	1.9952	0.0247542	0.0796807	Control avg is higher		D08	Thr-Ala	2.2153	2.53663	0.0619663	0.229812	Control avg is higher
D09	Thr-Arg	1.04187	1.29732	0.0198302	0.0796807	Control avg is higher		D03	Ser-Phe	1.39992	1.61968	0.0646345	0.229812	Control avg is higher
D10	Thr-Asp	2.14613	2.54976	0.0209734	0.0796807	Control avg is higher		E05	Thr-Pro	2.17037	2.51418	0.0646345	0.229812	Control avg is higher
E01	Thr-Gly	1.2558	1.56099	0.0132448	0.0796807	Control avg is higher		C11	Ser-Gly	1.34414	1.54271	0.0702556	0.240876	Control avg is higher
E08	Trp-Arg	1.12745	1.43148	0.00457527	0.0796807	Control avg is higher		A02	NegativeControl	1.59899	1.72795	0.0762717	0.244069	Control avg is higher
E09	Trp-Asp	2.58638	3.09949	0.027591	0.0796807	Control avg is higher		C03	Pro-Trp	2.19725	2.53233	0.0762717	0.244069	Control avg is higher
E11	Trp-Gly	1.84658	2.23068	0.0167208	0.0796807	Control avg is higher		B04	Pro-Asp	2.83641	3.22272	0.0794337	0.245988	Control avg is higher
E12	Trp-Leu	1.38475	1.61629	0.0234331	0.0796807	Control avg is higher		C06	Ser-Ala	1.23719	1.37681	0.0827014	0.248104	Control avg is higher
F06	Trp-Val	2.25547	2.63073	0.0307039	0.0796807	Control avg is higher		A11	Phe-Tyr	2.06074	2.38843	0.0931628	0.263048	Control avg is higher
F10	Tyr-Gly	2.28126	2.81357	0.0261393	0.0796807	Control avg is higher		D10	Thr-Asp	2.28697	2.54976	0.0931628	0.263048	Control avg is higher
F11	Tyr-His	2.21033	2.79511	0.0132448	0.0796807	Control avg is higher		D09	Thr-Arg	1.1404	1.29732	0.100709	0.264405	Control avg is higher
H02	Val-His	1.79273	2.25625	0.0148937	0.0796807	Control avg is higher		B05	Pro-Glu	1.64613	1.85876	0.104661	0.264405	Control avg is higher
H04	Val-Leu	1.71398	2.09008	0.0323703	0.0796807	Control avg is higher		E08	Trp-Arg	1.25646	1.43148	0.104661	0.264405	Control avg is higher
H05	Val-Lys	1.69725	2.0446	0.0323703	0.0796807	Control avg is higher		F09	Tyr-Glu	3.54186	3.96604	0.104661	0.264405	Control avg is higher
H06	Val-Met	2.26777	2.74134	0.0261393	0.0796807	Control avg is higher		C02	Pro-Ser	1.18429	1.3634	0.112932	0.277988	Control avg is higher
A05	Phe-Ile	1.28837	1.54339	0.0359366	0.0862478	Control avg is higher		C01	Pro-Pro	1.45691	1.66795	0.121711	0.292107	Control avg is higher
E07	Trp-Ala	1.69443	1.97894	0.037842	0.0864959	Control avg is higher		H06	Val-Met	2.41386	2.74134	0.126296	0.295718	Control avg is higher
F09	Tyr-Glu	3.3318	3.96604	0.037842	0.0864959	Control avg is higher		F11	Tyr-His	2.45208	2.79511	0.131015	0.299462	Control avg is higher
D03	Ser-Phe	1.35668	1.61968	0.0398326	0.0889286	Control avg is higher		C05	Pro-Val	2.41713	2.68951	0.14086	0.314479	Control avg is higher
G10	Val-Asp	1.93631	2.26666	0.0419114	0.0914431	Control avg is higher		D05	Ser-Ser	1.20114	1.31913	0.151265	0.315684	Control avg is higher
A12	Phe-Val	1.20712	1.446	0.0463453	0.0926906	Control avg is higher		H08	Val-Pro	1.37067	1.57352	0.151265	0.315684	Control avg is higher
B04	Pro-Asp	2.74621	3.22272	0.0463453	0.0926906	Control avg is higher		H10	Val-Tyr	1.29763	1.49932	0.151265	0.315684	Control avg is higher
D02	Ser-Met	2.22621	2.62614	0.0463453	0.0926906	Control avg is higher		F10	Tyr-Gly	2.54443	2.81357	0.156683	0.320033	Control avg is higher
F04	Trp-Trp	1.72164	2.04825	0.0463453	0.0926906	Control avg is higher		C12	Ser-His	1.62315	1.83728	0.162246	0.324492	Control avg is higher
C07	Ser-Asn	1.76084	2.05178	0.0487064	0.0935162	Control avg is higher		B11	Pro-Lys	2.24762	2.46622	0.173818	0.34054	Control avg is higher
D04	Ser-Pro	1.98948	2.3164	0.0487064	0.0935162	Control avg is higher		D02	Ser-Met	2.37689	2.62614	0.185995	0.35711	Control avg is higher
B01	Pro-Ala	1.68773	2.04464	0.0537322	0.0973262	Control avg is higher		D06	Ser-Tyr	1.78915	1.9952	0.198791	0.372092	Control avg is higher
E06	Thr-Ser	1.38943	1.6352	0.0537322	0.0973262	Control avg is higher		C07	Ser-Asn	1.89394	2.05178	0.205426	0.372092	Control avg is higher
G07	Val-Ala	1.74847	2.11219	0.0537322	0.0973262	Control avg is higher		G05	Tyr-Tyr	2.20556	2.4512	0.205426	0.372092	Control avg is higher
B02	Pro-Arg	2.21736	2.558	0.0564032	0.0996779	Control avg is higher		B01	Pro-Ala	1.86122	2.04464	0.21222	0.375728	Control avg is higher
D08	Thr-Ala	2.17044	2.53663	0.0591838	0.0996779	Control avg is higher		D07	Ser-Val	2.2896	2.53693	0.219175	0.375728	Control avg is higher
E10	Trp-Glu	2.33777	2.83661	0.0591838	0.0996779	Control avg is higher		E04	Thr-Phe	2.36656	2.67745	0.219175	0.375728	Control avg is higher
G03	Tyr-Phe	2.54801	2.96584	0.0591838	0.0996779	Control avg is higher		G06	Tyr-Val	1.48846	1.64308	0.226292	0.381123	Control avg is higher
B11	Pro-Lys	2.14708	2.46622	0.0620772	0.101007	Control avg is higher		E06	Thr-Ser	1.48416	1.6352	0.241017	0.398925	Control avg is higher
D11	Thr-Glu	1.92224	2.21366	0.0620772	0.101007	Control avg is higher		B07	Pro-Gly	2.72266	3.00117	0.264349	0.422959	Control avg is higher
E02	Thr-Leu	2.70253	3.10458	0.0748444	0.117788	Control avg is higher		E02	Thr-Leu	2.85932	3.10458	0.264349	0.422959	Control avg is higher
H11	Val-Val	1.24958	1.47957	0.0748444	0.117788	Control avg is higher		G03	Tyr-Phe	2.70756	2.96584	0.272462	0.428792	Control avg is higher
H08	Val-Pro	1.33502	1.57352	0.0783511	0.121318	Control avg is higher		E09	Trp-Asp	2.82969	3.09949	0.289193	0.447783	Control avg is higher
C12	Ser-His	1.56764	1.83728	0.0819903	0.122985	Control avg is higher		G09	Val-Asn	1.80231	1.96697	0.297814	0.452152	Control avg is higher
F07	Tyr-Ala	1.72466	2.05669	0.0819903	0.122985	Control avg is higher		B02	Pro-Arg	2.33779	2.558	0.306604	0.452152	Control avg is higher
G05	Tyr-Tyr	2.10834	2.4512	0.0857655	0.12475	Control avg is higher		A10	Phe-Trp	1.74942	1.84128	0.315564	0.452152	Control avg is higher
G08	Val-Arg	1.6027	1.86737	0.0857655	0.12475	Control avg is higher		C04	Pro-Tyr	2.83128	3.09356	0.315564	0.452152	Control avg is higher
E05	Thr-Pro	2.1795	2.51418	0.0937368	0.134309	Control avg is higher		H11	Val-Val	1.32317	1.47957	0.315564	0.452152	Control avg is higher
D07	Ser-Val	2.24542	2.53693	0.106796	0.148586	Control avg is higher		F06	Trp-Val	2.47492	2.63073	0.324695	0.458393	Control avg is higher
F05	Trp-Tyr	1.9907	2.2882	0.106796	0.148586	Control avg is higher		E03	Thr-Met	3.40327	3.69068	0.333996	0.46469	Control avg is higher
G09	Val-Asn	1.71125	1.96697	0.111457	0.152855	Control avg is higher		F04	Trp-Trp	1.88259	2.04825	0.353108	0.484262	Control avg is higher
A02	NegativeControl	1.53684	1.72795	0.116276	0.157218	Control avg is higher		G11	Val-Glu	2.33021	2.43394	0.383044	0.517294	Control avg is higher
F03	Trp-Ser	2.17391	2.43032	0.121258	0.159462	Control avg is higher		F01	Trp-Lys	1.96216	1.85817	0.393359	0.517294	Large deletion patients' avg is higher
H07	Val-Phe	2.03991	2.37292	0.121258	0.159462	Control avg is higher		G10	Val-Asp	2.10779	2.26666	0.393359	0.517294	Control avg is higher
G02	Tyr-Lys	2.01788	2.23832	0.13172	0.17088	Control avg is higher		B12	Pro-Phe	1.94112	2.08491	0.425297	0.551737	Control avg is higher
G11	Val-Glu	2.16768	2.43394	0.137208	0.175626	Control avg is higher		H01	Val-Gly	1.12328	1.23878	0.436271	0.558427	Control avg is higher
A01	NegativeControl	1.58676	1.76744	0.148709	0.187843	Control avg is higher		G07	Val-Ala	1.96792	2.11219	0.447406	0.565145	Control avg is higher
B12	Pro-Phe	1.82268	2.08491	0.180669	0.22525	Control avg is higher		A06	Phe-Met	1.71295	1.80715	0.458701	0.571887	Control avg is higher
E04	Thr-Phe	2.38996	2.67745	0.187632	0.230932	Control avg is higher		G08	Val-Arg	1.74378	1.86737	0.470154	0.578652	Control avg is higher
F01	Trp-Lys	1.64872	1.85817	0.217468	0.260962	Control avg is higher		D12	Thr-Gln	3.24646	3.30794	0.481758	0.585427	Control avg is higher
H03	Val-Ile	1.92111	2.18801	0.217468	0.260962	Control avg is higher		F02	Trp-Phe	2.64432	2.7854	0.493504	0.592205	Control avg is higher
B06	Pro-Gln	4.75107	5.27424	0.225433	0.263922	Control avg is higher		F03	Trp-Ser	2.2939	2.43032	0.505443	0.599043	Control avg is higher
H09	Val-Ser	1.53212	1.72242	0.225433	0.263922	Control avg is higher		E07	Trp-Ala	1.8748	1.97894	0.517508	0.605863	Control avg is higher
H10	Val-Tyr	1.30935	1.49932	0.233605	0.270193	Control avg is higher		E12	Trp-Leu	1.56608	1.61629	0.714512	0.826423	Control avg is higher
F02	Trp-Phe	2.55009	2.7854	0.259371	0.296424	Control avg is higher		F07	Tyr-Ala	1.96668	2.05669	0.728558	0.829056	Control avg is higher
D12	Thr-Gln	3.10707	3.30794	0.306559	0.346231	Control avg is higher		E11	Trp-Gly	2.12575	2.23068	0.742696	0.829056	Control avg is higher
G06	Tyr-Val	1.49532	1.64308	0.316639	0.353458	Control avg is higher		G12	Val-Gln	3.3945	3.09648	0.742696	0.829056	Large deletion patients' avg is higher
F12	Tyr-Ile	1.87334	2.04286	0.337446	0.372354	Control avg is higher		F08	Tyr-Gln	2.39543	2.37532	0.800076	0.882843	Large deletion patients' avg is higher
G04	Tyr-Trp	1.9212	2.07816	0.348171	0.379823	Control avg is higher		H12	D-(+)-Glucose	5.34556	5.11049	0.814605	0.88866	Large deletion patients' avg is higher
C10	Ser-Gln	3.36974	3.61987	0.359111	0.387356	Control avg is higher		C10	Ser-Gln	3.60106	3.61987	0.84385	0.91022	Control avg is higher
G01	Tyr-Leu	2.0694	2.25532	0.370264	0.394948	Control avg is higher		B06	Pro-Gln	5.11621	5.27424	0.858556	0.915794	Control avg is higher
D05	Ser-Ser	1.2229	1.31913	0.393208	0.414812	Control avg is higher		F12	Tyr-Ile	2.05157	2.04286	0.902951	0.947431	Large deletion patients' avg is higher
E03	Thr-Met	3.43354	3.69068	0.467028	0.487333	Control avg is higher		A12	Phe-Val	1.49425	1.446	0.917824	0.947431	Large deletion patients' avg is higher
G12	Val-Gln	3.36924	3.09648	0.743843	0.767838	Small deletion patients' avg is higher		F05	Trp-Tyr	2.223	2.2882	0.917824	0.947431	Control avg is higher
H12	D-(+)-Glucose	5.34836	5.11049	0.775947	0.792456	Small deletion patients' avg is higher		G01	Tyr-Leu	2.19428	2.25532	0.977551	0.977551	Control avg is higher
H01	Val-Gly	1.1658	1.23878	0.808438	0.816948	Control avg is higher		G02	Tyr-Lys	2.22271	2.23832	0.977551	0.977551	Control avg is higher
F08	Tyr-Gln	2.40177	2.37532	0.891005	0.891005	Small deletion patients' avg is higher		G04	Tyr-Trp	2.04123	2.07816	0.977551	0.977551	Control avg is higher

## Sheet: PM5
PM-M5 (Metabolic effectors)
well	CMS	mean_small_deletion_p	mean_cntrl	p.value	adj_p	Note		well	CMS	mean_large_deletion_p	mean_cntrl	p.value	adj_p	Note
A07	NaCl	5.09362	3.12235	0.00350215	0.222878	Small deletion patients' avg is higher		F02	SodiumTungstate	1.32139	2.79871	6.71055e-05	0.00257198	Control avg is higher
A08	NaCl	4.3082	2.21281	0.0055668	0.222878	Small deletion patients' avg is higher		G01	SodiumPyrophosphate	3.77385	6.47557	0.000107166	0.00257198	Control avg is higher
A09	NaCl	2.15959	0.785175	0.00696493	0.222878	Small deletion patients' avg is higher		G03	SodiumPyrophosphate	2.79002	5.01566	8.49302e-05	0.00257198	Control avg is higher
C03	CalciumChoride	0.575097	0.721045	0.0564032	0.552697	Control avg is higher		G04	SodiumPyrophosphate	5.55659	9.70467	6.19962e-05	0.00257198	Control avg is higher
C10	ZincChloride	1.11234	1.49163	0.0748444	0.552697	Control avg is higher		A10	NaCl	0.472433	0.676574	0.000151011	0.00289941	Control avg is higher
C12	ZincChloride	0.637344	0.769381	0.037842	0.552697	Control avg is higher		F01	SodiumTungstate	2.29236	5.07062	0.000196329	0.00314127	Control avg is higher
D01	Copper(II)Chloride	2.16036	2.99262	0.0682156	0.552697	Control avg is higher		B01	AmmoniumChloride	4.04866	6.67725	0.000352079	0.00363052	Control avg is higher
D08	CobaltChloride	5.58106	4.32788	0.0591838	0.552697	Small deletion patients' avg is higher		E01	SodiumPhosphate	3.35037	5.72857	0.000378179	0.00363052	Control avg is higher
D09	Iodine	6.16081	4.62415	0.0359366	0.552697	Small deletion patients' avg is higher		G02	SodiumPyrophosphate	5.01557	8.4428	0.000327672	0.00363052	Control avg is higher
E09	SodiumMolybdate	4.04807	3.03799	0.0748444	0.552697	Small deletion patients' avg is higher		G05	SodiumNitrate	3.60407	6.10626	0.000352079	0.00363052	Control avg is higher
F01	SodiumTungstate	3.79278	5.07062	0.0682156	0.552697	Control avg is higher		D05	CobaltChloride	3.20255	5.82825	0.000662155	0.00523658	Control avg is higher
F02	SodiumTungstate	1.97709	2.79871	0.0440813	0.552697	Control avg is higher		E02	SodiumPhosphate	4.06861	7.23452	0.000618095	0.00523658	Control avg is higher
F04	SodiumTungstate	0.568075	0.4751	0.0591838	0.552697	Small deletion patients' avg is higher		E05	SodiumSulfate	3.44513	5.47734	0.00070912	0.00523658	Control avg is higher
A10	NaCl	0.597035	0.676574	0.180669	0.667137	Control avg is higher		H01	LithiumChloride	2.6773	4.47803	0.000812472	0.00557124	Control avg is higher
B11	PotassiumChloride	6.31026	4.70255	0.111457	0.667137	Small deletion patients' avg is higher		H03	LithiumChloride	3.88967	6.00368	0.000993952	0.0063613	Control avg is higher
E02	SodiumPhosphate	6.27419	7.23452	0.187632	0.667137	Control avg is higher		H05	FerricChloride	3.99378	6.84478	0.00121236	0.00727418	Control avg is higher
E07	SodiumSulfate	4.83267	3.99699	0.167322	0.667137	Small deletion patients' avg is higher		D01	Copper(II)Chloride	1.51848	2.99262	0.00138175	0.00780281	Control avg is higher
E08	SodiumSulfate	5.52729	4.52522	0.137208	0.667137	Small deletion patients' avg is higher		B12	PotassiumChloride	0.783583	1.07714	0.00147439	0.0078634	Control avg is higher
F07	SodiumOrthovanadate	0.13089	0.211478	0.167322	0.667137	Control avg is higher		A01	NegativeControl	3.08058	5.15678	0.00202949	0.0102543	Control avg is higher
F08	SodiumOrthovanadate	0.323173	0.536629	0.0979397	0.667137	Control avg is higher		H02	LithiumChloride	3.80298	5.85014	0.0029459	0.0141403	Control avg is higher
F09	PotassiumChromate	6.18533	5.19378	0.167322	0.667137	Small deletion patients' avg is higher		E03	SodiumPhosphate	3.43608	5.93514	0.00313107	0.0143135	Control avg is higher
G08	SodiumNitrate	5.82698	4.9146	0.1739	0.667137	Small deletion patients' avg is higher		B03	AmmoniumChloride	4.11109	6.57572	0.00398267	0.0173789	Control avg is higher
G09	SodiumNitrite	3.874	3.04279	0.142869	0.667137	Small deletion patients' avg is higher		B02	AmmoniumChloride	3.79916	5.93474	0.00671416	0.023516	Control avg is higher
G12	SodiumNitrite	3.97432	3.08971	0.180669	0.667137	Small deletion patients' avg is higher		B04	AmmoniumChloride	3.77478	6.24496	0.00634385	0.023516	Control avg is higher
H01	LithiumChloride	3.86803	4.47803	0.180669	0.667137	Control avg is higher		D02	Copper(II)Chloride	0.675172	1.67208	0.00710378	0.023516	Control avg is higher
H07	FerricChloride	4.09173	5.32263	0.187632	0.667137	Control avg is higher		F03	SodiumTungstate	0.765554	1.22897	0.00671416	0.023516	Control avg is higher
H08	FerricChloride	2.07614	2.85752	0.116276	0.667137	Control avg is higher		F08	SodiumOrthovanadate	0.207752	0.536629	0.00652593	0.023516	Control avg is higher
A06	NaCl	4.61618	3.99884	0.370264	0.690193	Small deletion patients' avg is higher		G07	SodiumNitrate	3.52973	5.18643	0.00690576	0.023516	Control avg is higher
A11	NaCl	0.485129	0.541228	0.416992	0.690193	Control avg is higher		H06	FerricChloride	3.75274	6.23639	0.00599203	0.023516	Control avg is higher
A12	NaCl	0.702107	0.56293	0.233605	0.690193	Small deletion patients' avg is higher		G06	SodiumNitrate	2.78121	4.07554	0.00839733	0.0268714	Control avg is higher
B01	AmmoniumChloride	6.18306	6.67725	0.416992	0.690193	Control avg is higher		A08	NaCl	3.92617	2.21281	0.00887315	0.0274782	Large deletion patients' avg is higher
B04	AmmoniumChloride	7.05538	6.24496	0.404995	0.690193	Small deletion patients' avg is higher		A02	NegativeControl	3.87539	6.01615	0.00989765	0.0279463	Control avg is higher
B07	SodiumSelenite	0.686124	0.957069	0.213556	0.690193	Control avg is higher		A04	NegativeControl	4.78273	7.06455	0.00989765	0.0279463	Control avg is higher
B09	PotassiumChloride	8.03919	6.43982	0.202149	0.690193	Small deletion patients' avg is higher		A11	NaCl	0.438999	0.541228	0.00989765	0.0279463	Control avg is higher
B10	PotassiumChloride	4.46728	3.56964	0.217468	0.690193	Small deletion patients' avg is higher		A09	NaCl	1.83876	0.785175	0.0122677	0.0336486	Large deletion patients' avg is higher
C01	CalciumChoride	0.658192	1.15739	0.370264	0.690193	Control avg is higher		H04	LithiumChloride	4.97171	7.07138	0.0129337	0.0344899	Control avg is higher
C08	ManganeseChloride	13.2684	10.1322	0.296693	0.690193	Small deletion patients' avg is higher		D06	CobaltChloride	4.51788	6.35833	0.0176426	0.0457755	Control avg is higher
C11	ZincChloride	0.669356	0.733006	0.241984	0.690193	Control avg is higher		C10	ZincChloride	0.890358	1.49163	0.0185589	0.0468856	Control avg is higher
D02	Copper(II)Chloride	1.15302	1.67208	0.326935	0.690193	Control avg is higher		A03	NegativeControl	3.93291	5.69568	0.0195165	0.0480406	Control avg is higher
D04	Copper(II)Chloride	1.31346	1.2328	0.241977	0.690193	Small deletion patients' avg is higher		H07	FerricChloride	3.27755	5.32263	0.0215619	0.0517487	Control avg is higher
D10	Iodine	5.67687	4.6398	0.250572	0.690193	Small deletion patients' avg is higher		C05	ManganeseChloride	9.43537	15.6009	0.0237915	0.055707	Control avg is higher
D11	Iodine	4.18927	3.26645	0.370264	0.690193	Small deletion patients' avg is higher		E06	SodiumSulfate	3.02026	4.17844	0.0275102	0.0628804	Control avg is higher
D12	Iodine	4.13794	3.47799	0.393208	0.690193	Small deletion patients' avg is higher		A05	NaCl	5.0701	6.95191	0.0288564	0.0644237	Control avg is higher
E04	SodiumPhosphate	3.19722	2.95376	0.393208	0.690193	Small deletion patients' avg is higher		B11	PotassiumChloride	6.45949	4.70255	0.0437362	0.0954245	Large deletion patients' avg is higher
E10	SodiumMolybdate	3.22307	2.71585	0.287042	0.690193	Small deletion patients' avg is higher		A12	NaCl	0.460368	0.56293	0.0457328	0.0954424	Control avg is higher
E12	SodiumMolybdate	4.4252	3.54617	0.348171	0.690193	Small deletion patients' avg is higher		C12	ZincChloride	0.641567	0.769381	0.0457328	0.0954424	Control avg is higher
F03	SodiumTungstate	0.997637	1.22897	0.287042	0.690193	Control avg is higher		H08	FerricChloride	1.77095	2.85752	0.0499569	0.10204	Control avg is higher
F05	SodiumOrthovanadate	0.384567	0.577788	0.38163	0.690193	Control avg is higher		A07	NaCl	4.05443	3.12235	0.0732131	0.146426	Large deletion patients' avg is higher
F06	SodiumOrthovanadate	0.254014	0.338581	0.393201	0.690193	Control avg is higher		C11	ZincChloride	0.636885	0.733006	0.0895636	0.175472	Control avg is higher
F10	PotassiumChromate	4.56829	3.93358	0.370264	0.690193	Small deletion patients' avg is higher		D10	Iodine	5.82047	4.6398	0.0968771	0.186004	Large deletion patients' avg is higher
F11	PotassiumChromate	3.4149	2.7174	0.277605	0.690193	Small deletion patients' avg is higher		H10	MagnesiumChloride	3.49866	2.90493	0.104661	0.197008	Large deletion patients' avg is higher
F12	PotassiumChromate	3.82172	3.0701	0.38163	0.690193	Small deletion patients' avg is higher		B10	PotassiumChloride	4.56007	3.56964	0.108734	0.20074	Large deletion patients' avg is higher
G01	SodiumPyrophosphate	5.93546	6.47557	0.416992	0.690193	Control avg is higher		E10	SodiumMolybdate	3.50679	2.71585	0.112932	0.200769	Large deletion patients' avg is higher
G10	SodiumNitrite	5.48876	4.48241	0.277605	0.690193	Small deletion patients' avg is higher		H11	MagnesiumChloride	3.60637	2.97721	0.112932	0.200769	Large deletion patients' avg is higher
H04	LithiumChloride	7.78023	7.07138	0.370264	0.690193	Small deletion patients' avg is higher		F04	SodiumTungstate	0.513038	0.4751	0.135869	0.232918	Large deletion patients' avg is higher
H05	FerricChloride	6.40192	6.84478	0.359111	0.690193	Control avg is higher		F10	PotassiumChromate	4.76574	3.93358	0.135869	0.232918	Large deletion patients' avg is higher
H06	FerricChloride	5.4309	6.23639	0.393208	0.690193	Control avg is higher		F05	SodiumOrthovanadate	0.365137	0.577788	0.145992	0.245881	Control avg is higher
H09	MagnesiumChloride	4.16968	3.5538	0.404995	0.690193	Small deletion patients' avg is higher		D07	CobaltChloride	3.8056	4.51231	0.17983	0.292604	Control avg is higher
B12	PotassiumChloride	0.999343	1.07714	0.473502	0.743284	Control avg is higher		E12	SodiumMolybdate	4.25433	3.54617	0.17983	0.292604	Large deletion patients' avg is higher
C06	ManganeseChloride	41.7925	40.4755	0.480038	0.743284	Small deletion patients' avg is higher		B05	SodiumSelenite	3.98448	5.07479	0.185995	0.292713	Control avg is higher
G03	SodiumPyrophosphate	4.74775	5.01566	0.467028	0.743284	Control avg is higher		B09	PotassiumChloride	7.69573	6.43982	0.185995	0.292713	Large deletion patients' avg is higher
H12	MagnesiumChloride	2.66394	2.26424	0.467028	0.743284	Small deletion patients' avg is higher		A06	NaCl	3.32552	3.99884	0.198791	0.30292	Control avg is higher
B03	AmmoniumChloride	6.93223	6.57572	0.520226	0.768334	Small deletion patients' avg is higher		E08	SodiumSulfate	3.47004	4.52522	0.198785	0.30292	Control avg is higher
C07	ManganeseChloride	32.6538	32.6507	0.50664	0.768334	Small deletion patients' avg is higher		H12	MagnesiumChloride	2.57024	2.26424	0.248628	0.372942	Large deletion patients' avg is higher
E11	SodiumMolybdate	4.11437	3.60108	0.520226	0.768334	Small deletion patients' avg is higher		F11	PotassiumChromate	3.10376	2.7174	0.256405	0.37869	Large deletion patients' avg is higher
B08	SodiumSelenite	1.06351	1.27947	0.547951	0.79702	Control avg is higher		C06	ManganeseChloride	28.0233	40.4755	0.264349	0.378769	Control avg is higher
E01	SodiumPhosphate	5.37746	5.72857	0.576388	0.813724	Control avg is higher		D11	Iodine	3.91476	3.26645	0.264349	0.378769	Large deletion patients' avg is higher
H10	MagnesiumChloride	3.23895	2.90493	0.576388	0.813724	Small deletion patients' avg is higher		C01	CalciumChoride	0.665288	1.15739	0.302181	0.426579	Control avg is higher
A03	NegativeControl	6.04908	5.69568	0.605502	0.842437	Small deletion patients' avg is higher		E09	SodiumMolybdate	3.55351	3.03799	0.306604	0.426579	Large deletion patients' avg is higher
G02	SodiumPyrophosphate	8.21941	8.4428	0.620301	0.850699	Control avg is higher		D04	Copper(II)Chloride	1.14337	1.2328	0.329311	0.451627	Control avg is higher
C09	ZincChloride	2.67561	2.59687	0.650362	0.85527	Small deletion patients' avg is higher		G12	SodiumNitrite	3.4793	3.08971	0.343467	0.464406	Large deletion patients' avg is higher
D07	CobaltChloride	4.89108	4.51231	0.650362	0.85527	Small deletion patients' avg is higher		E11	SodiumMolybdate	4.16961	3.60108	0.353108	0.47081	Large deletion patients' avg is higher
G11	SodiumNitrite	3.8926	3.43908	0.635256	0.85527	Small deletion patients' avg is higher		G10	SodiumNitrite	5.10022	4.48241	0.362918	0.470812	Large deletion patients' avg is higher
C04	CalciumChoride	0.991293	0.973683	0.681002	0.871683	Small deletion patients' avg is higher		H09	MagnesiumChloride	3.94113	3.5538	0.362918	0.470812	Large deletion patients' avg is higher
G07	SodiumNitrate	5.01119	5.18643	0.681002	0.871683	Control avg is higher		D12	Iodine	3.89749	3.47799	0.372897	0.477308	Large deletion patients' avg is higher
A01	NegativeControl	4.95079	5.15678	0.712178	0.876527	Control avg is higher		C03	CalciumChoride	0.686575	0.721045	0.40384	0.503489	Control avg is higher
C02	CalciumChoride	0.624935	0.69959	0.712178	0.876527	Control avg is higher		C08	ManganeseChloride	11.3844	10.1322	0.40384	0.503489	Large deletion patients' avg is higher
H11	MagnesiumChloride	3.22407	2.97721	0.712178	0.876527	Small deletion patients' avg is higher		D09	Iodine	5.08744	4.62415	0.414487	0.510137	Large deletion patients' avg is higher
G04	SodiumPyrophosphate	9.359	9.70467	0.727952	0.8846	Control avg is higher		D03	Copper(II)Chloride	0.234123	0.315092	0.436253	0.53013	Control avg is higher
B05	SodiumSelenite	4.87827	5.07479	0.775947	0.897481	Control avg is higher		B08	SodiumSelenite	1.11649	1.27947	0.481764	0.578117	Control avg is higher
D03	Copper(II)Chloride	0.285742	0.315092	0.775944	0.897481	Control avg is higher		G09	SodiumNitrite	3.35742	3.04279	0.505443	0.599043	Large deletion patients' avg is higher
D05	CobaltChloride	6.01058	5.82825	0.775947	0.897481	Small deletion patients' avg is higher		G08	SodiumNitrate	4.39618	4.9146	0.554578	0.649262	Control avg is higher
D06	CobaltChloride	6.52433	6.35833	0.759843	0.897481	Small deletion patients' avg is higher		F12	PotassiumChromate	3.27088	3.0701	0.567217	0.656059	Large deletion patients' avg is higher
A02	NegativeControl	6.19838	6.01615	0.808438	0.902443	Small deletion patients' avg is higher		C02	CalciumChoride	0.602438	0.69959	0.60594	0.691095	Control avg is higher
E03	SodiumPhosphate	5.77083	5.93514	0.808438	0.902443	Control avg is higher		E04	SodiumPhosphate	2.20275	2.95376	0.619106	0.691095	Control avg is higher
G06	SodiumNitrate	3.94287	4.07554	0.808438	0.902443	Control avg is higher		G11	SodiumNitrite	3.55694	3.43908	0.619106	0.691095	Large deletion patients' avg is higher
E06	SodiumSulfate	4.21874	4.17844	0.841263	0.928291	Small deletion patients' avg is higher		F06	SodiumOrthovanadate	0.281603	0.338581	0.645786	0.704513	Control avg is higher
A04	NegativeControl	7.46888	7.06455	0.857784	0.932658	Small deletion patients' avg is higher		F09	PotassiumChromate	5.20812	5.19378	0.645804	0.704513	Large deletion patients' avg is higher
H02	LithiumChloride	5.84986	5.85014	0.874367	0.932658	Control avg is higher		B07	SodiumSelenite	1.07341	0.957069	0.742696	0.80111	Large deletion patients' avg is higher
H03	LithiumChloride	6.20392	6.00368	0.874367	0.932658	Small deletion patients' avg is higher		C04	CalciumChoride	1.03167	0.973683	0.77123	0.813605	Large deletion patients' avg is higher
B02	AmmoniumChloride	6.06626	5.93474	0.924419	0.975212	Small deletion patients' avg is higher		F07	SodiumOrthovanadate	0.174388	0.211478	0.77123	0.813605	Control avg is higher
G05	SodiumNitrate	6.14914	6.10626	0.94118	0.982101	Small deletion patients' avg is higher		C07	ManganeseChloride	31.2581	32.6507	0.84385	0.871071	Control avg is higher
A05	NaCl	7.05636	6.95191	0.974773	0.985034	Small deletion patients' avg is higher		D08	CobaltChloride	4.40389	4.32788	0.84385	0.871071	Large deletion patients' avg is higher
B06	SodiumSelenite	1.69119	1.98323	0.974773	0.985034	Control avg is higher		C09	ZincChloride	2.66278	2.59687	0.873312	0.891893	Large deletion patients' avg is higher
E05	SodiumSulfate	5.45709	5.47734	0.957967	0.985034	Control avg is higher		B06	SodiumSelenite	1.64635	1.98323	0.917824	0.917824	Control avg is higher
C05	ManganeseChloride	16.002	15.6009	0.99159	0.99159	Small deletion patients' avg is higher		E07	SodiumSulfate	3.69624	3.99699	0.917824	0.917824	Control avg is higher

## Sheet: PM6
PM-M6 (Metabolic effectors)
well	CMS	mean_small_deletion_p	mean_cntrl	p.value	adj_p	Note		well	CMS	mean_large_deletion_p	mean_cntrl	p.value	adj_p	Note
A08	Dibutyryl-cAMP	7.09456	5.95723	0.0979397	0.577647	Small deletion patients' avg is higher		E03	Triiodothyronine	3.77917	6.72056	2.33493e-05	0.0010582	Control avg is higher
A09	Dibutyryl-cAMP	5.18909	4.00806	0.037842	0.577647	Small deletion patients' avg is higher		D01	L-Leucine	3.30305	5.69901	4.50129e-05	0.0010582	Control avg is higher
A12	Dibutyryl-cAMP	4.26844	3.11676	0.0896798	0.577647	Small deletion patients' avg is higher		D03	L-Leucine	4.49008	8.05559	5.28619e-05	0.0010582	Control avg is higher
B01	3-Isobutyl-1-Methylxanthine	5.1288	6.74833	0.0487064	0.577647	Control avg is higher		A01	NegativeControl	3.12624	5.4244	5.72568e-05	0.0010582	Control avg is higher
B02	3-Isobutyl-1-Methylxanthine	5.75137	7.89555	0.027591	0.577647	Control avg is higher		D02	L-Leucine	4.5072	8.07059	7.85428e-05	0.0010582	Control avg is higher
B03	3-Isobutyl-1-Methylxanthine	3.96784	5.61171	0.0564032	0.577647	Control avg is higher		E01	Triiodothyronine	3.57018	5.88587	8.49302e-05	0.0010582	Control avg is higher
B04	3-Isobutyl-1-Methylxanthine	1.80254	2.8705	0.0650867	0.577647	Control avg is higher		C03	Epinephrine	3.518	6.29885	9.92058e-05	0.0010582	Control avg is higher
B06	3-Isobutyl-1-Methylxanthine	0.245746	1.65579	0.0440751	0.577647	Control avg is higher		E02	Triiodothyronine	4.61777	8.03942	9.92058e-05	0.0010582	Control avg is higher
B11	Caffeine	3.78263	2.7439	0.102292	0.577647	Small deletion patients' avg is higher		E04	Triiodothyronine	4.58604	7.92806	9.92058e-05	0.0010582	Control avg is higher
C01	Epinephrine	4.77607	5.612	0.0857654	0.577647	Control avg is higher		C01	Epinephrine	3.25039	5.612	0.000115726	0.00111097	Control avg is higher
C04	Epinephrine	7.02578	8.08405	0.0896798	0.577647	Control avg is higher		C02	Epinephrine	3.65707	6.29439	0.000134817	0.00117658	Control avg is higher
D02	L-Leucine	6.81839	8.07059	0.0783511	0.577647	Control avg is higher		G01	Progesterone	3.0105	5.11905	0.000151011	0.00120809	Control avg is higher
D03	L-Leucine	6.87106	8.05559	0.0979397	0.577647	Control avg is higher		A05	NegativeControl	3.37266	5.50433	0.000196329	0.00134626	Control avg is higher
D12	Creatine	5.14847	4.06457	0.0857654	0.577647	Small deletion patients' avg is higher		D04	L-Leucine	3.88844	6.81398	0.000196329	0.00134626	Control avg is higher
F10	Hydrocortisone	4.28017	3.28878	0.102292	0.577647	Small deletion patients' avg is higher		A02	NegativeControl	3.44536	5.81139	0.000211445	0.00135325	Control avg is higher
F12	Hydrocortisone	3.92823	3.0404	0.0714671	0.577647	Small deletion patients' avg is higher		C04	Epinephrine	4.74458	8.08405	0.000263615	0.00158169	Control avg is higher
G12	beta-Estradiol	4.97093	3.88705	0.0979397	0.577647	Small deletion patients' avg is higher		F02	Dexamethasone	3.82243	6.92372	0.000283533	0.00160113	Control avg is higher
B10	Caffeine	3.40937	2.68644	0.111457	0.5875	Small deletion patients' avg is higher		C05	Epinephrine	2.59436	4.20541	0.000327672	0.00174759	Control avg is higher
F01	Dexamethasone	6.13255	7.15901	0.116276	0.5875	Control avg is higher		G03	Progesterone	2.5047	4.14546	0.00043589	0.00220239	Control avg is higher
A02	NegativeControl	5.17583	5.81139	0.187632	0.601156	Control avg is higher		A04	NegativeControl	4.65449	7.4816	0.000538042	0.0025826	Control avg is higher
A10	Dibutyryl-cAMP	7.07642	5.76108	0.154729	0.601156	Small deletion patients' avg is higher		B02	3-Isobutyl-1-Methylxanthine	4.09347	7.89555	0.00070912	0.00309434	Control avg is higher
A11	Dibutyryl-cAMP	5.90977	4.75604	0.154729	0.601156	Small deletion patients' avg is higher		G05	Progesterone	2.33442	3.73935	0.00070912	0.00309434	Control avg is higher
B08	Caffeine	5.37354	4.69944	0.217468	0.601156	Small deletion patients' avg is higher		A03	NegativeControl	3.58833	5.64405	0.000812472	0.00324989	Control avg is higher
B09	Caffeine	6.86628	5.55058	0.217468	0.601156	Small deletion patients' avg is higher		C06	Epinephrine	3.08163	5.0521	0.000812472	0.00324989	Control avg is higher
C11	Norepinephrine	6.40315	5.24148	0.202149	0.601156	Small deletion patients' avg is higher		B01	3-Isobutyl-1-Methylxanthine	3.8205	6.74833	0.000869236	0.00333787	Control avg is higher
C12	Norepinephrine	4.33642	3.33852	0.154729	0.601156	Small deletion patients' avg is higher		F01	Dexamethasone	4.48725	7.15901	0.000993952	0.00353405	Control avg is higher
D01	L-Leucine	5.09256	5.69901	0.225433	0.601156	Control avg is higher		G04	Progesterone	4.48668	7.03473	0.000993952	0.00353405	Control avg is higher
D04	L-Leucine	5.91681	6.81398	0.142869	0.601156	Control avg is higher		G02	Progesterone	4.41878	7.10776	0.00106234	0.00364232	Control avg is higher
E01	Triiodothyronine	5.31783	5.88587	0.225433	0.601156	Control avg is higher		H01	4,5-a-Dihydrotestosterone	3.48232	5.41172	0.00121236	0.00387956	Control avg is higher
E03	Triiodothyronine	5.98652	6.72056	0.217468	0.601156	Control avg is higher		H02	4,5-a-Dihydrotestosterone	4.99265	7.90013	0.00121236	0.00387956	Control avg is higher
E04	Triiodothyronine	7.1892	7.92806	0.194792	0.601156	Control avg is higher		H04	4,5-a-Dihydrotestosterone	3.96875	6.21292	0.00138175	0.00427896	Control avg is higher
F11	Hydrocortisone	4.89187	3.9028	0.13172	0.601156	Small deletion patients' avg is higher		F03	Dexamethasone	3.98062	6.90388	0.00147439	0.00428913	Control avg is higher
G01	Progesterone	4.42318	5.11905	0.194792	0.601156	Control avg is higher		F04	Dexamethasone	1.98414	3.58172	0.00147439	0.00428913	Control avg is higher
G05	Progesterone	3.34226	3.73935	0.209707	0.601156	Control avg is higher		H03	4,5-a-Dihydrotestosterone	4.65996	7.30403	0.00167707	0.00473525	Control avg is higher
H09	Aldosterone	4.85355	4.11635	0.167322	0.601156	Small deletion patients' avg is higher		H05	4,5-a-Dihydrotestosterone	4.88445	7.54453	0.00202949	0.00556661	Control avg is higher
H12	Aldosterone	5.05711	4.13856	0.180669	0.601156	Small deletion patients' avg is higher		E05	Triiodothyronine	3.4801	5.32333	0.0021613	0.00560769	Control avg is higher
C03	Epinephrine	5.70058	6.29885	0.241984	0.611327	Control avg is higher		G06	Progesterone	4.72713	7.11785	0.0021613	0.00560769	Control avg is higher
C10	Norepinephrine	4.89191	4.18065	0.241984	0.611327	Small deletion patients' avg is higher		G07	beta-Estradiol	4.55449	6.59941	0.0035336	0.00892698	Control avg is higher
D11	Creatine	5.94899	5.07462	0.287042	0.640838	Small deletion patients' avg is higher		F05	Dexamethasone	2.36042	3.97436	0.00422611	0.0104027	Control avg is higher
E05	Triiodothyronine	4.88631	5.32333	0.268382	0.640838	Control avg is higher		E06	Triiodothyronine	3.43689	5.11818	0.00503955	0.0120949	Control avg is higher
E09	Thyroxine	3.73497	3.06182	0.287042	0.640838	Small deletion patients' avg is higher		H06	4,5-a-Dihydrotestosterone	4.73814	6.92563	0.00534064	0.0125049	Control avg is higher
E10	Thyroxine	5.59736	4.55666	0.268382	0.640838	Small deletion patients' avg is higher		B06	3-Isobutyl-1-Methylxanthine	0.207782	1.65579	0.00751358	0.0171739	Control avg is higher
E11	Thyroxine	5.30694	4.16933	0.287042	0.640838	Small deletion patients' avg is higher		F07	Hydrocortisone	3.2274	4.61875	0.00911906	0.0203588	Control avg is higher
G10	beta-Estradiol	5.56237	4.79825	0.296693	0.64733	Small deletion patients' avg is higher		F06	Dexamethasone	2.99566	4.80546	0.0104484	0.0227965	Control avg is higher
F04	Dexamethasone	3.13301	3.58172	0.306559	0.653992	Control avg is higher		B03	3-Isobutyl-1-Methylxanthine	3.31906	5.61171	0.0116323	0.0248156	Control avg is higher
A01	NegativeControl	4.94748	5.4244	0.38163	0.654223	Control avg is higher		D05	L-Leucine	2.35893	3.54953	0.0185589	0.0387316	Control avg is higher
A07	Dibutyryl-cAMP	6.04268	5.6269	0.38163	0.654223	Small deletion patients' avg is higher		A06	NegativeControl	4.41866	6.06656	0.0195165	0.0398635	Control avg is higher
C05	Epinephrine	3.88584	4.20541	0.38163	0.654223	Control avg is higher		H07	Aldosterone	4.09766	5.54894	0.020517	0.041034	Control avg is higher
C06	Epinephrine	4.66565	5.0521	0.38163	0.654223	Control avg is higher		B04	3-Isobutyl-1-Methylxanthine	1.6733	2.8705	0.0215619	0.0422438	Control avg is higher
F02	Dexamethasone	6.26387	6.92372	0.359111	0.654223	Control avg is higher		D06	L-Leucine	2.33312	3.39694	0.0226529	0.0434936	Control avg is higher
F03	Dexamethasone	6.17654	6.90388	0.38163	0.654223	Control avg is higher		B07	Caffeine	5.87452	7.70817	0.0249795	0.0470202	Control avg is higher
F09	Hydrocortisone	6.02787	5.23434	0.38163	0.654223	Small deletion patients' avg is higher		E07	Thyroxine	3.87566	5.25662	0.0348234	0.0630764	Control avg is higher
G06	Progesterone	6.54414	7.11785	0.359111	0.654223	Control avg is higher		F08	Hydrocortisone	3.7271	5.02009	0.0348234	0.0630764	Control avg is higher
H08	Aldosterone	5.99601	5.35242	0.370264	0.654223	Small deletion patients' avg is higher		A07	Dibutyryl-cAMP	4.19576	5.6269	0.0381828	0.0678805	Control avg is higher
H10	Aldosterone	6.06702	5.09691	0.359111	0.654223	Small deletion patients' avg is higher		C08	Norepinephrine	3.21879	4.29416	0.0399633	0.0697541	Control avg is higher
H11	Aldosterone	5.74205	4.81872	0.38163	0.654223	Small deletion patients' avg is higher		C07	Norepinephrine	3.87298	5.17952	0.0457328	0.0783992	Control avg is higher
E12	Thyroxine	3.00871	2.33561	0.393208	0.662244	Small deletion patients' avg is higher		G08	beta-Estradiol	3.32061	4.29417	0.0646345	0.108858	Control avg is higher
C08	Norepinephrine	4.7875	4.29416	0.441604	0.669174	Small deletion patients' avg is higher		D07	Creatine	3.5147	4.64309	0.0794336	0.131476	Control avg is higher
C09	Norepinephrine	4.92788	4.24778	0.416992	0.669174	Small deletion patients' avg is higher		E08	Thyroxine	5.17252	6.64062	0.0895636	0.145731	Control avg is higher
D09	Creatine	6.068	5.43227	0.467028	0.669174	Small deletion patients' avg is higher		H08	Aldosterone	4.18818	5.35242	0.0931628	0.14906	Control avg is higher
D10	Creatine	4.58321	4.04866	0.467028	0.669174	Small deletion patients' avg is higher		G09	beta-Estradiol	3.81683	4.80673	0.162246	0.255338	Control avg is higher
F07	Hydrocortisone	4.2668	4.61875	0.467028	0.669174	Control avg is higher		D08	Creatine	4.77061	5.93281	0.173812	0.269128	Control avg is higher
G02	Progesterone	6.63682	7.10776	0.429195	0.669174	Control avg is higher		B08	Caffeine	3.85801	4.69944	0.233572	0.35592	Control avg is higher
G04	Progesterone	6.50055	7.03473	0.416992	0.669174	Control avg is higher		A08	Dibutyryl-cAMP	5.01419	5.95723	0.241017	0.361526	Control avg is higher
G09	beta-Estradiol	5.45259	4.80673	0.467028	0.669174	Small deletion patients' avg is higher		G10	beta-Estradiol	4.0911	4.79825	0.297814	0.439848	Control avg is higher
G11	beta-Estradiol	5.45592	4.84301	0.454215	0.669174	Small deletion patients' avg is higher		B11	Caffeine	3.27544	2.7439	0.306604	0.445969	Large deletion patients' avg is higher
H01	4,5-a-Dihydrotestosterone	5.15503	5.41172	0.467028	0.669174	Control avg is higher		F09	Hydrocortisone	4.57241	5.23434	0.40384	0.578637	Control avg is higher
A03	NegativeControl	5.33194	5.64405	0.533998	0.742954	Control avg is higher		A12	Dibutyryl-cAMP	3.56623	3.11676	0.425297	0.60042	Large deletion patients' avg is higher
F06	Dexamethasone	4.3202	4.80546	0.533998	0.742954	Control avg is higher		B05	3-Isobutyl-1-Methylxanthine	0.803348	0.937779	0.436271	0.606986	Control avg is higher
A05	NegativeControl	5.17429	5.50433	0.562083	0.747746	Control avg is higher		B10	Caffeine	2.93737	2.68644	0.458701	0.629076	Large deletion patients' avg is higher
B05	3-Isobutyl-1-Methylxanthine	1.01051	0.937779	0.562083	0.747746	Small deletion patients' avg is higher		D09	Creatine	4.62251	5.43227	0.470154	0.635702	Control avg is higher
B12	Caffeine	1.74971	1.48327	0.576388	0.747746	Small deletion patients' avg is higher		A11	Dibutyryl-cAMP	4.98656	4.75604	0.529721	0.696619	Large deletion patients' avg is higher
H03	4,5-a-Dihydrotestosterone	7.05312	7.30403	0.576388	0.747746	Control avg is higher		H11	Aldosterone	4.38069	4.81872	0.529721	0.696619	Control avg is higher
H06	4,5-a-Dihydrotestosterone	6.52748	6.92563	0.547951	0.747746	Control avg is higher		H10	Aldosterone	4.58606	5.09691	0.554578	0.713837	Control avg is higher
G03	Progesterone	3.94041	4.14546	0.620301	0.793986	Control avg is higher		G11	beta-Estradiol	4.32937	4.84301	0.567217	0.713837	Control avg is higher
C02	Epinephrine	6.03537	6.29439	0.665612	0.838156	Control avg is higher		H09	Aldosterone	3.6352	4.11635	0.567217	0.713837	Control avg is higher
H02	4,5-a-Dihydrotestosterone	7.55233	7.90013	0.681002	0.838156	Control avg is higher		A10	Dibutyryl-cAMP	5.97841	5.76108	0.579993	0.713837	Large deletion patients' avg is higher
H04	4,5-a-Dihydrotestosterone	6.04185	6.21292	0.681002	0.838156	Control avg is higher		F12	Hydrocortisone	3.20427	3.0404	0.579993	0.713837	Large deletion patients' avg is higher
E02	Triiodothyronine	7.73806	8.03942	0.696526	0.846411	Control avg is higher		G12	beta-Estradiol	3.52299	3.88705	0.60594	0.736333	Control avg is higher
B07	Caffeine	7.61131	7.70817	0.759843	0.868392	Control avg is higher		C12	Norepinephrine	3.45127	3.33852	0.619106	0.742927	Large deletion patients' avg is higher
C07	Norepinephrine	5.25455	5.17952	0.759843	0.868392	Small deletion patients' avg is higher		E12	Thyroxine	2.50674	2.33561	0.645804	0.765397	Large deletion patients' avg is higher
E08	Thyroxine	7.05325	6.64062	0.759843	0.868392	Small deletion patients' avg is higher		C09	Norepinephrine	3.83995	4.24778	0.700561	0.820169	Control avg is higher
F05	Dexamethasone	3.74641	3.97436	0.743843	0.868392	Control avg is higher		F11	Hydrocortisone	3.91634	3.9028	0.728558	0.842669	Large deletion patients' avg is higher
H07	Aldosterone	5.88664	5.54894	0.743843	0.868392	Small deletion patients' avg is higher		A09	Dibutyryl-cAMP	4.00082	4.00806	0.756921	0.865053	Control avg is higher
A04	NegativeControl	7.46939	7.4816	0.792147	0.894661	Control avg is higher		D10	Creatine	3.82962	4.04866	0.785616	0.887284	Control avg is higher
D05	L-Leucine	3.43282	3.54953	0.808438	0.902443	Control avg is higher		E11	Thyroxine	4.22532	4.16933	0.800076	0.890215	Large deletion patients' avg is higher
G08	beta-Estradiol	4.24717	4.29417	0.824813	0.910138	Control avg is higher		E10	Thyroxine	4.44129	4.55666	0.829198	0.890215	Control avg is higher
E07	Thyroxine	5.34553	5.25662	0.857784	0.92525	Small deletion patients' avg is higher		C11	Norepinephrine	5.22157	5.24148	0.84385	0.890215	Control avg is higher
F08	Hydrocortisone	5.2351	5.02009	0.857784	0.92525	Small deletion patients' avg is higher		D11	Creatine	5.01025	5.07462	0.84385	0.890215	Control avg is higher
E06	Triiodothyronine	5.01753	5.11818	0.874367	0.932658	Control avg is higher		F10	Hydrocortisone	3.08813	3.28878	0.84385	0.890215	Control avg is higher
A06	NegativeControl	6.08076	6.06656	0.891005	0.939962	Small deletion patients' avg is higher		H12	Aldosterone	3.97976	4.13856	0.84385	0.890215	Control avg is higher
D06	L-Leucine	3.29739	3.39694	0.924419	0.944088	Control avg is higher		E09	Thyroxine	2.88674	3.06182	0.858556	0.895885	Control avg is higher
D07	Creatine	4.69387	4.64309	0.924419	0.944088	Small deletion patients' avg is higher		B12	Caffeine	1.45839	1.48327	0.902951	0.932078	Control avg is higher
D08	Creatine	6.05917	5.93281	0.924419	0.944088	Small deletion patients' avg is higher		B09	Caffeine	5.51111	5.55058	0.932725	0.952571	Control avg is higher
H05	4,5-a-Dihydrotestosterone	7.72924	7.54453	0.94118	0.951087	Small deletion patients' avg is higher		C10	Norepinephrine	4.06414	4.18065	0.947651	0.957626	Control avg is higher
G07	beta-Estradiol	6.59546	6.59941	0.957967	0.957967	Control avg is higher		D12	Creatine	3.98691	4.06457	0.977552	0.977552	Control avg is higher

## Sheet: PM7
PM-M7 (Metabolic effectors)
well	CMS	mean_small_deletion_p	mean_cntrl	p.value	adj_p	Note		well	CMS	mean_large_deletion_p	mean_cntrl	p.value	adj_p	Note
A10	Insulin	3.2464	2.59121	0.0937368	0.702509	Small deletion patients' avg is higher		B05	Resistin	2.76764	4.50409	0.000156846	0.00454049	Control avg is higher
A11	Insulin	4.3373	3.37785	0.0819903	0.702509	Small deletion patients' avg is higher		E03	hGH(Somatotropin)	3.8872	7.00214	0.000156846	0.00454049	Control avg is higher
A12	Insulin	4.65372	3.35016	0.0419114	0.702509	Small deletion patients' avg is higher		F01	FGF-1(aFGF)	3.34287	5.57757	0.000169092	0.00454049	Control avg is higher
B09	Glucagon	6.23573	5.04438	0.0650867	0.702509	Small deletion patients' avg is higher		G01	IL-1beta	2.87318	4.64915	0.000227649	0.00454049	Control avg is higher
B10	Glucagon	4.24731	3.2743	0.0511676	0.702509	Small deletion patients' avg is higher		C05	Ghrelin	3.78078	6.05371	0.000304856	0.00454049	Control avg is higher
B11	Glucagon	4.5194	3.42186	0.0487064	0.702509	Small deletion patients' avg is higher		C06	Ghrelin	4.29386	6.98476	0.000352079	0.00454049	Control avg is higher
B12	Glucagon	4.48094	3.52928	0.111457	0.702509	Small deletion patients' avg is higher		D05	Gastrin	2.60317	4.21647	0.000378179	0.00454049	Control avg is higher
C01	Ghrelin	4.51182	5.581	0.0819903	0.702509	Control avg is higher		F04	FGF-1(aFGF)	3.34096	5.69538	0.00043589	0.00454049	Control avg is higher
C10	Leptin	7.49576	5.43689	0.0650867	0.702509	Small deletion patients' avg is higher		E01	hGH(Somatotropin)	2.65449	4.23297	0.000501742	0.00454049	Control avg is higher
C11	Leptin	5.99541	4.5616	0.0857654	0.702509	Small deletion patients' avg is higher		A05	NegativeControl	4.0262	6.47158	0.000538042	0.00454049	Control avg is higher
C12	Leptin	4.61936	3.61653	0.0748445	0.702509	Small deletion patients' avg is higher		E06	hGH(Somatotropin)	2.58918	4.42882	0.000576777	0.00454049	Control avg is higher
D10	Exendin-3	4.99504	4.07632	0.121258	0.702509	Small deletion patients' avg is higher		B04	Resistin	4.39352	7.09862	0.000618095	0.00454049	Control avg is higher
D11	Exendin-3	5.13095	4.11611	0.13172	0.702509	Small deletion patients' avg is higher		E02	hGH(Somatotropin)	4.73854	7.79482	0.000618095	0.00454049	Control avg is higher
E01	hGH(Somatotropin)	3.5971	4.23297	0.126405	0.702509	Control avg is higher		E05	hGH(Somatotropin)	2.28684	3.97688	0.000662155	0.00454049	Control avg is higher
E03	hGH(Somatotropin)	5.63069	7.00214	0.0440813	0.702509	Control avg is higher		B02	Resistin	2.549	4.15544	0.000869236	0.00530108	Control avg is higher
E04	hGH(Somatotropin)	5.31344	6.28264	0.116276	0.702509	Control avg is higher		C01	Ghrelin	3.47587	5.581	0.000993952	0.00530108	Control avg is higher
E05	hGH(Somatotropin)	2.87565	3.97688	0.0247542	0.702509	Control avg is higher		C02	Ghrelin	2.6733	4.11736	0.000993952	0.00530108	Control avg is higher
E06	hGH(Somatotropin)	3.59212	4.42882	0.106796	0.702509	Control avg is higher		F03	FGF-1(aFGF)	5.05524	8.17466	0.000993952	0.00530108	Control avg is higher
C09	Leptin	4.21734	3.43278	0.167322	0.803144	Small deletion patients' avg is higher		F05	FGF-1(aFGF)	4.71771	7.69658	0.00106234	0.00536763	Control avg is higher
D12	Exendin-3	5.31315	4.40695	0.167322	0.803144	Small deletion patients' avg is higher		F02	FGF-1(aFGF)	4.77392	7.74783	0.00121236	0.00559191	Control avg is higher
A02	NegativeControl	4.27212	4.61118	0.467028	0.818717	Control avg is higher		D04	Gastrin	3.72421	5.93207	0.0012945	0.00559191	Control avg is higher
A03	NegativeControl	3.94806	4.29825	0.50664	0.818717	Control avg is higher		G05	IL-1beta	4.7777	7.96052	0.00138175	0.00559191	Control avg is higher
A04	NegativeControl	4.03381	4.51397	0.233605	0.818717	Control avg is higher		G03	IL-1beta	4.56014	7.39538	0.00147439	0.00559191	Control avg is higher
A05	NegativeControl	6.03283	6.47158	0.429195	0.818717	Control avg is higher		B03	Resistin	4.71745	7.26942	0.00157272	0.00559191	Control avg is higher
A09	Insulin	3.34105	2.77374	0.202149	0.818717	Small deletion patients' avg is higher		D01	Gastrin	3.7704	5.65476	0.00157272	0.00559191	Control avg is higher
B01	Resistin	4.95839	5.48148	0.38163	0.818717	Control avg is higher		E04	hGH(Somatotropin)	3.78013	6.28264	0.00157272	0.00559191	Control avg is higher
B02	Resistin	3.82435	4.15544	0.480038	0.818717	Control avg is higher		F06	FGF-1(aFGF)	4.67896	7.57488	0.00157272	0.00559191	Control avg is higher
B08	Glucagon	5.33039	4.672	0.316639	0.818717	Small deletion patients' avg is higher		D06	Gastrin	3.90114	6.16968	0.00167707	0.0057153	Control avg is higher
C02	Ghrelin	3.85641	4.11736	0.370264	0.818717	Control avg is higher		A03	NegativeControl	2.70659	4.29825	0.00178774	0.0057153	Control avg is higher
C05	Ghrelin	5.73913	6.05371	0.50664	0.818717	Control avg is higher		A04	NegativeControl	2.92918	4.51397	0.0019051	0.0057153	Control avg is higher
C06	Ghrelin	6.49081	6.98476	0.467028	0.818717	Control avg is higher		D03	Gastrin	3.75414	5.91754	0.0019051	0.0057153	Control avg is higher
D01	Gastrin	5.07528	5.65476	0.277605	0.818717	Control avg is higher		H01	IL-6	3.30861	5.06984	0.0019051	0.0057153	Control avg is higher
D03	Gastrin	5.59187	5.91754	0.493243	0.818717	Control avg is higher		C04	Ghrelin	3.64268	5.76705	0.0021613	0.00610249	Control avg is higher
D04	Gastrin	5.53405	5.93207	0.326935	0.818717	Control avg is higher		G06	IL-1beta	3.44486	5.64126	0.0021613	0.00610249	Control avg is higher
D05	Gastrin	4.01802	4.21647	0.467028	0.818717	Control avg is higher		G04	IL-1beta	4.5343	7.15509	0.0022298	0.00611603	Control avg is higher
D08	Exendin-3	4.98477	4.51088	0.429195	0.818717	Small deletion patients' avg is higher		C03	Ghrelin	3.4088	5.15188	0.00260521	0.00694724	Control avg is higher
D09	Exendin-3	6.1454	5.28226	0.404995	0.818717	Small deletion patients' avg is higher		A02	NegativeControl	2.99269	4.61118	0.00277078	0.00699986	Control avg is higher
E02	hGH(Somatotropin)	7.28622	7.79482	0.520226	0.818717	Control avg is higher		B01	Resistin	3.60357	5.48148	0.00277078	0.00699986	Control avg is higher
E07	IGF-I	4.53626	4.75044	0.520226	0.818717	Control avg is higher		A01	NegativeControl	3.04917	4.69117	0.00398267	0.00980349	Control avg is higher
E09	IGF-I	5.81675	4.89817	0.225433	0.818717	Small deletion patients' avg is higher		E07	IGF-I	3.21626	4.75044	0.00475389	0.0111311	Control avg is higher
E10	IGF-I	6.5163	5.677	0.268382	0.818717	Small deletion patients' avg is higher		H03	IL-6	3.34609	5.11005	0.00475389	0.0111311	Control avg is higher
E11	IGF-I	4.50984	4.06071	0.416992	0.818717	Small deletion patients' avg is higher		G02	IL-1beta	4.43049	6.89802	0.00503955	0.011519	Control avg is higher
E12	IGF-I	4.15167	3.68101	0.441604	0.818717	Small deletion patients' avg is higher		B06	Resistin	4.7467	6.75175	0.00534064	0.0119233	Control avg is higher
F01	FGF-1(aFGF)	4.97212	5.57757	0.233605	0.818717	Control avg is higher		D07	Exendin-3	4.11156	5.81298	0.00565789	0.0123445	Control avg is higher
F03	FGF-1(aFGF)	7.5205	8.17466	0.441604	0.818717	Control avg is higher		H02	IL-6	2.68182	4.12956	0.00599203	0.012783	Control avg is higher
F04	FGF-1(aFGF)	5.18218	5.69538	0.393208	0.818717	Control avg is higher		D02	Gastrin	3.03704	4.53787	0.00751279	0.0153469	Control avg is higher
F05	FGF-1(aFGF)	6.92509	7.69658	0.277605	0.818717	Control avg is higher		G07	IL-2	4.3312	6.47999	0.00751358	0.0153469	Control avg is higher
F06	FGF-1(aFGF)	6.89991	7.57488	0.416992	0.818717	Control avg is higher		H06	IL-6	3.71597	5.64556	0.00839733	0.0167947	Control avg is higher
F10	PDGF-AB	5.23224	4.81256	0.520226	0.818717	Small deletion patients' avg is higher		G09	IL-2	3.54755	4.95372	0.0104484	0.0204703	Control avg is higher
F11	PDGF-AB	5.94832	5.29625	0.370264	0.818717	Small deletion patients' avg is higher		F07	PDGF-AB	3.0295	4.07117	0.0151275	0.0290449	Control avg is higher
F12	PDGF-AB	4.887	4.43429	0.454215	0.818717	Small deletion patients' avg is higher		H04	IL-6	3.59524	5.16821	0.0159284	0.0299828	Control avg is higher
G03	IL-1beta	6.62555	7.39538	0.370264	0.818717	Control avg is higher		A06	NegativeControl	4.08695	5.76899	0.0176426	0.032571	Control avg is higher
G04	IL-1beta	6.41561	7.15509	0.316639	0.818717	Control avg is higher		A07	Insulin	3.32211	4.49582	0.0195165	0.0353506	Control avg is higher
G05	IL-1beta	7.03221	7.96052	0.342775	0.818717	Control avg is higher		F08	PDGF-AB	4.70003	6.34797	0.020517	0.0364747	Control avg is higher
H01	IL-6	4.49392	5.06984	0.187632	0.818717	Control avg is higher		H05	IL-6	3.57456	5.16472	0.0226529	0.0395396	Control avg is higher
H02	IL-6	3.80343	4.12956	0.393208	0.818717	Control avg is higher		C07	Leptin	4.78707	6.66758	0.0262185	0.0449459	Control avg is higher
H04	IL-6	4.69278	5.16821	0.429195	0.818717	Control avg is higher		E08	IGF-I	4.67112	6.39415	0.0275102	0.0463329	Control avg is higher
H06	IL-6	5.18433	5.64556	0.454215	0.818717	Control avg is higher		G08	IL-2	3.06641	4.20272	0.030259	0.049235	Control avg is higher
H10	IL-8	4.24997	3.52	0.194792	0.818717	Small deletion patients' avg is higher		G10	IL-2	4.68621	6.25078	0.030259	0.049235	Control avg is higher
H11	IL-8	3.7336	3.41822	0.416992	0.818717	Small deletion patients' avg is higher		H07	IL-8	4.19249	5.8048	0.0348234	0.0557175	Control avg is higher
H12	IL-8	4.95808	4.51693	0.480038	0.818717	Small deletion patients' avg is higher		H09	IL-8	2.92014	3.75101	0.0399633	0.062893	Control avg is higher
A08	Insulin	4.44477	3.98769	0.562083	0.843124	Small deletion patients' avg is higher		F09	PDGF-AB	5.09903	6.72664	0.0478057	0.0740217	Control avg is higher
C08	Leptin	4.9953	4.58182	0.562083	0.843124	Small deletion patients' avg is higher		D08	Exendin-3	3.46419	4.51088	0.0545034	0.0830528	Control avg is higher
G01	IL-1beta	4.3375	4.64915	0.562083	0.843124	Control avg is higher		H08	IL-8	3.11149	4.00661	0.0673969	0.101095	Control avg is higher
E08	IGF-I	7.01922	6.39415	0.576388	0.85128	Small deletion patients' avg is higher		D09	Exendin-3	4.17879	5.28226	0.0732131	0.10813	Control avg is higher
B04	Resistin	6.83082	7.09862	0.620301	0.896832	Control avg is higher		F11	PDGF-AB	4.20569	5.29625	0.0794337	0.113815	Control avg is higher
D02	Gastrin	4.43234	4.53787	0.635251	0.896832	Control avg is higher		F12	PDGF-AB	3.53683	4.43429	0.0794337	0.113815	Control avg is higher
G06	IL-1beta	5.321	5.64126	0.635256	0.896832	Control avg is higher		B07	Glucagon	4.26118	5.44817	0.0931628	0.129618	Control avg is higher
C03	Ghrelin	4.94642	5.15188	0.650362	0.904851	Control avg is higher		F10	PDGF-AB	3.88181	4.81256	0.0931628	0.129618	Control avg is higher
B03	Resistin	7.04479	7.26942	0.712178	0.923907	Control avg is higher		A08	Insulin	3.06572	3.98769	0.112932	0.152697	Control avg is higher
F09	PDGF-AB	7.16782	6.72664	0.681002	0.923907	Small deletion patients' avg is higher		G11	IL-2	3.38792	4.20065	0.112932	0.152697	Control avg is higher
G11	IL-2	4.42262	4.20065	0.696526	0.923907	Small deletion patients' avg is higher		D12	Exendin-3	3.66339	4.40695	0.126296	0.168395	Control avg is higher
H05	IL-6	4.97014	5.16472	0.712178	0.923907	Control avg is higher		C08	Leptin	3.60633	4.58182	0.131015	0.169965	Control avg is higher
H08	IL-8	4.17389	4.00661	0.696526	0.923907	Small deletion patients' avg is higher		G12	IL-2	3.55283	4.51243	0.131015	0.169965	Control avg is higher
H03	IL-6	4.93442	5.11005	0.727952	0.931779	Control avg is higher		B08	Glucagon	3.70756	4.672	0.156683	0.197915	Control avg is higher
G08	IL-2	4.32087	4.20272	0.743843	0.939591	Small deletion patients' avg is higher		D10	Exendin-3	3.27716	4.07632	0.156683	0.197915	Control avg is higher
A01	NegativeControl	4.61102	4.69117	0.857784	0.97835	Control avg is higher		E09	IGF-I	3.96933	4.89817	0.162246	0.202281	Control avg is higher
A06	NegativeControl	5.89252	5.76899	0.94118	0.97835	Small deletion patients' avg is higher		H12	IL-8	3.76808	4.51693	0.226292	0.278513	Control avg is higher
A07	Insulin	4.56647	4.49582	0.94118	0.97835	Small deletion patients' avg is higher		E11	IGF-I	3.42361	4.06071	0.241017	0.292882	Control avg is higher
B05	Resistin	4.56219	4.50409	0.891005	0.97835	Small deletion patients' avg is higher		E12	IGF-I	3.09886	3.68101	0.264349	0.317219	Control avg is higher
B06	Resistin	6.80404	6.75175	0.907692	0.97835	Small deletion patients' avg is higher		E10	IGF-I	4.67272	5.677	0.297814	0.352964	Control avg is higher
B07	Glucagon	5.53151	5.44817	0.957967	0.97835	Small deletion patients' avg is higher		D11	Exendin-3	3.4427	4.11611	0.315564	0.369441	Control avg is higher
C04	Ghrelin	5.73769	5.76705	0.808438	0.97835	Control avg is higher		H11	IL-8	2.94176	3.41822	0.393359	0.454969	Control avg is higher
C07	Leptin	6.98562	6.66758	0.824813	0.97835	Small deletion patients' avg is higher		B09	Glucagon	4.33126	5.04438	0.40384	0.456102	Control avg is higher
F02	FGF-1(aFGF)	7.60857	7.74783	0.841263	0.97835	Control avg is higher		C09	Leptin	2.98745	3.43278	0.40384	0.456102	Control avg is higher
F07	PDGF-AB	4.09017	4.07117	0.94118	0.97835	Small deletion patients' avg is higher		C10	Leptin	4.80787	5.43689	0.414487	0.462683	Control avg is higher
F08	PDGF-AB	6.3959	6.34797	0.94118	0.97835	Small deletion patients' avg is higher		A09	Insulin	2.50281	2.77374	0.425298	0.469294	Control avg is higher
G02	IL-1beta	6.75414	6.89802	0.874367	0.97835	Control avg is higher		H10	IL-8	3.04541	3.52	0.447406	0.48808	Control avg is higher
G07	IL-2	6.407	6.47999	0.907692	0.97835	Control avg is higher		B12	Glucagon	3.23766	3.52928	0.481764	0.519655	Control avg is higher
G09	IL-2	5.09489	4.95372	0.824813	0.97835	Small deletion patients' avg is higher		C12	Leptin	3.28562	3.61653	0.554578	0.59155	Control avg is higher
G10	IL-2	6.45275	6.25078	0.841263	0.97835	Small deletion patients' avg is higher		C11	Leptin	4.04073	4.5616	0.592902	0.625479	Control avg is higher
G12	IL-2	4.7196	4.51243	0.841263	0.97835	Small deletion patients' avg is higher		B10	Glucagon	2.95039	3.2743	0.619106	0.646024	Control avg is higher
H07	IL-8	5.97208	5.8048	0.891005	0.97835	Small deletion patients' avg is higher		B11	Glucagon	3.12919	3.42186	0.700561	0.72316	Control avg is higher
H09	IL-8	3.88956	3.75101	0.957967	0.97835	Small deletion patients' avg is higher		A10	Insulin	2.38701	2.59121	0.728558	0.744059	Control avg is higher
D06	Gastrin	6.19967	6.16968	1	1	Small deletion patients' avg is higher		A11	Insulin	3.12229	3.37785	0.756921	0.764889	Control avg is higher
D07	Exendin-3	5.85895	5.81298	0.99159	1	Small deletion patients' avg is higher		A12	Insulin	3.41188	3.35016	0.77123	0.77123	Large deletion patients' avg is higher

## Sheet: PM8
PM-M8 (Metabolic effectors)
well	CMS	mean_small_deletion_p	mean_cntrl	p.value	adj_p	Note		well	CMS	mean_large_deletion_p	mean_cntrl	p.value	adj_p	Note
A01	NegativeControl	5.02022	5.13997	0.696526	0.97835	Control avg is higher		C06	Calcitonin	4.6313	7.17217	0.000618095	0.00947483	Control avg is higher
A02	NegativeControl	5.02564	5.33767	0.520226	0.97835	Control avg is higher		E03	ChorionicGonadotropinHuman(HCG)	3.51402	5.93943	0.000869236	0.00947483	Control avg is higher
A03	NegativeControl	4.33268	4.9156	0.268382	0.97835	Control avg is higher		A07	(Arg8)-Vasopressin	3.48138	5.15252	0.000929658	0.00947483	Control avg is higher
A04	NegativeControl	4.46418	4.77813	0.50664	0.97835	Control avg is higher		D02	LuteinizingHormone(LH)	2.97631	4.74093	0.000929658	0.00947483	Control avg is higher
A05	NegativeControl	3.57706	3.95048	0.416992	0.97835	Control avg is higher		D03	LuteinizingHormone(LH)	3.49999	5.86043	0.000929658	0.00947483	Control avg is higher
A06	NegativeControl	5.39439	5.45395	0.907692	0.97835	Control avg is higher		F04	ThyrotropicHormone(TSH)	2.18769	3.88263	0.000929658	0.00947483	Control avg is higher
A07	(Arg8)-Vasopressin	4.81908	5.15252	0.393208	0.97835	Control avg is higher		A03	NegativeControl	3.13171	4.9156	0.00106234	0.00947483	Control avg is higher
A08	(Arg8)-Vasopressin	3.85959	3.79042	0.891005	0.97835	Small deletion patients' avg is higher		A04	NegativeControl	2.96229	4.77813	0.00113506	0.00947483	Control avg is higher
A09	(Arg8)-Vasopressin	4.90168	4.5545	0.576388	0.97835	Small deletion patients' avg is higher		E04	ChorionicGonadotropinHuman(HCG)	4.69704	7.51505	0.00113506	0.00947483	Control avg is higher
A10	(Arg8)-Vasopressin	4.7611	4.18535	0.241984	0.97835	Small deletion patients' avg is higher		C01	Calcitonin	3.79394	5.9411	0.00121236	0.00947483	Control avg is higher
A11	(Arg8)-Vasopressin	4.62855	4.00765	0.241984	0.97835	Small deletion patients' avg is higher		A05	NegativeControl	2.43931	3.95048	0.0012945	0.00947483	Control avg is higher
A12	(Arg8)-Vasopressin	4.97796	4.1153	0.0682156	0.97835	Small deletion patients' avg is higher		D06	LuteinizingHormone(LH)	5.05251	7.89218	0.0012945	0.00947483	Control avg is higher
B01	ParathyroidHormone	4.06334	4.47307	0.316639	0.97835	Control avg is higher		F03	ThyrotropicHormone(TSH)	3.86654	6.43402	0.0012945	0.00947483	Control avg is higher
B02	ParathyroidHormone	4.48124	4.55287	0.891005	0.97835	Control avg is higher		B01	ParathyroidHormone	2.84582	4.47307	0.00138175	0.00947483	Control avg is higher
B03	ParathyroidHormone	6.84487	7.28754	0.562083	0.97835	Control avg is higher		A01	NegativeControl	3.44344	5.13997	0.00202949	0.010824	Control avg is higher
B04	ParathyroidHormone	6.91111	7.17749	0.696526	0.97835	Control avg is higher		B03	ParathyroidHormone	4.74813	7.28754	0.00202949	0.010824	Control avg is higher
B05	ParathyroidHormone	5.052	5.09574	0.94118	0.97835	Control avg is higher		C02	Calcitonin	2.63801	4.11593	0.00202949	0.010824	Control avg is higher
B06	ParathyroidHormone	6.8843	7.10854	0.775947	0.97835	Control avg is higher		E02	ChorionicGonadotropinHuman(HCG)	4.21591	7.42143	0.00202949	0.010824	Control avg is higher
B07	Prolactin	4.13999	4.3502	0.393208	0.97835	Control avg is higher		A02	NegativeControl	3.51329	5.33767	0.00230091	0.0111942	Control avg is higher
B08	Prolactin	6.43894	5.85405	0.38163	0.97835	Small deletion patients' avg is higher		B04	ParathyroidHormone	4.67083	7.17749	0.00244874	0.0111942	Control avg is higher
B09	Prolactin	6.28545	5.55646	0.441604	0.97835	Small deletion patients' avg is higher		C05	Calcitonin	2.72227	4.15832	0.00244874	0.0111942	Control avg is higher
B10	Prolactin	4.22702	3.69225	0.250572	0.97835	Small deletion patients' avg is higher		F02	ThyrotropicHormone(TSH)	4.37295	6.74684	0.0029459	0.0124205	Control avg is higher
B11	Prolactin	5.78563	5.16338	0.38163	0.97835	Small deletion patients' avg is higher		E09	AdrenocorticotropicHormoneHuman(ACTH)	3.67988	5.22115	0.00313107	0.0124205	Control avg is higher
B12	Prolactin	4.51919	4.1755	0.493243	0.97835	Small deletion patients' avg is higher		F06	ThyrotropicHormone(TSH)	3.54943	5.48444	0.00313107	0.0124205	Control avg is higher
C01	Calcitonin	5.44695	5.9411	0.38163	0.97835	Control avg is higher		F05	ThyrotropicHormone(TSH)	4.81136	7.57609	0.00332679	0.0124205	Control avg is higher
C02	Calcitonin	3.89444	4.11593	0.441604	0.97835	Control avg is higher		B05	ParathyroidHormone	3.3938	5.09574	0.00342835	0.0124205	Control avg is higher
C03	Calcitonin	5.2336	5.50638	0.635256	0.97835	Control avg is higher		E07	AdrenocorticotropicHormoneHuman(ACTH)	3.76453	5.55701	0.00353359	0.0124205	Control avg is higher
C04	Calcitonin	5.81136	5.87825	0.874367	0.97835	Control avg is higher		D04	LuteinizingHormone(LH)	4.04697	6.33155	0.00375203	0.0124205	Control avg is higher
C05	Calcitonin	3.77898	4.15832	0.404995	0.97835	Control avg is higher		E05	ChorionicGonadotropinHuman(HCG)	3.76595	5.83707	0.00375203	0.0124205	Control avg is higher
C06	Calcitonin	6.58572	7.17217	0.547951	0.97835	Control avg is higher		A08	(Arg8)-Vasopressin	2.68631	3.79042	0.00398267	0.0127445	Control avg is higher
C07	Calcitriol(1a,25-dihydroxyvitaminD3)	5.57266	5.59136	0.874367	0.97835	Control avg is higher		A06	NegativeControl	3.74075	5.45395	0.00422611	0.0130873	Control avg is higher
C08	Calcitriol(1a,25-dihydroxyvitaminD3)	4.78468	4.40809	0.441604	0.97835	Small deletion patients' avg is higher		E11	AdrenocorticotropicHormoneHuman(ACTH)	4.07627	5.7116	0.00448297	0.0134489	Control avg is higher
C10	Calcitriol(1a,25-dihydroxyvitaminD3)	5.39381	5.03847	0.650362	0.97835	Small deletion patients' avg is higher		E01	ChorionicGonadotropinHuman(HCG)	2.89047	4.35744	0.00475389	0.0138295	Control avg is higher
C11	Calcitriol(1a,25-dihydroxyvitaminD3)	5.81062	5.72188	0.94118	0.97835	Small deletion patients' avg is higher		C04	Calcitonin	3.94263	5.87825	0.00534064	0.0150795	Control avg is higher
C12	Calcitriol(1a,25-dihydroxyvitaminD3)	4.60373	4.49423	0.681002	0.97835	Small deletion patients' avg is higher		C03	Calcitonin	3.63023	5.50638	0.00565789	0.0155188	Control avg is higher
D01	LuteinizingHormone(LH)	3.83059	3.90064	0.775947	0.97835	Control avg is higher		D07	LuteinizingHormoneReleasingHormone(LH-RH)	4.7596	6.87946	0.00634385	0.0164597	Control avg is higher
D02	LuteinizingHormone(LH)	4.45501	4.74093	0.520226	0.97835	Control avg is higher		D08	LuteinizingHormoneReleasingHormone(LH-RH)	4.42494	6.36665	0.00634385	0.0164597	Control avg is higher
D03	LuteinizingHormone(LH)	5.3567	5.86043	0.416992	0.97835	Control avg is higher		D01	LuteinizingHormone(LH)	2.59164	3.90064	0.00671416	0.0165272	Control avg is higher
D04	LuteinizingHormone(LH)	5.84203	6.33155	0.547951	0.97835	Control avg is higher		E08	AdrenocorticotropicHormoneHuman(ACTH)	4.71838	6.58214	0.00671416	0.0165272	Control avg is higher
D05	LuteinizingHormone(LH)	5.78761	6.11397	0.635256	0.97835	Control avg is higher		D05	LuteinizingHormone(LH)	4.15131	6.11397	0.00710378	0.0170491	Control avg is higher
D06	LuteinizingHormone(LH)	7.46927	7.89218	0.620301	0.97835	Control avg is higher		B02	ParathyroidHormone	3.06336	4.55287	0.00794445	0.0186016	Control avg is higher
D07	LuteinizingHormoneReleasingHormone(LH-RH)	6.54768	6.87946	0.696526	0.97835	Control avg is higher		E12	AdrenocorticotropicHormoneHuman(ACTH)	3.09815	4.18048	0.00839733	0.0191939	Control avg is higher
D08	LuteinizingHormoneReleasingHormone(LH-RH)	6.80141	6.36665	0.635256	0.97835	Small deletion patients' avg is higher		C07	Calcitriol(1a,25-dihydroxyvitaminD3)	3.96293	5.59136	0.00887315	0.0198098	Control avg is higher
D09	LuteinizingHormoneReleasingHormone(LH-RH)	6.27371	6.23078	0.857784	0.97835	Small deletion patients' avg is higher		F01	ThyrotropicHormone(TSH)	3.53648	5.27869	0.0104484	0.0227965	Control avg is higher
D10	LuteinizingHormoneReleasingHormone(LH-RH)	6.96968	6.7987	0.857784	0.97835	Small deletion patients' avg is higher		B06	ParathyroidHormone	4.89708	7.10854	0.0110262	0.0235226	Control avg is higher
D12	LuteinizingHormoneReleasingHormone(LH-RH)	3.88031	3.97264	0.635256	0.97835	Control avg is higher		G01	IFN-gamma	3.70298	5.02047	0.0116323	0.0242761	Control avg is higher
E01	ChorionicGonadotropinHuman(HCG)	4.2842	4.35744	0.635256	0.97835	Control avg is higher		B07	Prolactin	3.2117	4.3502	0.0122677	0.0250575	Control avg is higher
E02	ChorionicGonadotropinHuman(HCG)	6.83282	7.42143	0.533998	0.97835	Control avg is higher		D10	LuteinizingHormoneReleasingHormone(LH-RH)	4.83715	6.7987	0.0136315	0.027263	Control avg is higher
E03	ChorionicGonadotropinHuman(HCG)	5.22984	5.93943	0.246245	0.97835	Control avg is higher		E06	ChorionicGonadotropinHuman(HCG)	3.96536	5.50234	0.0151275	0.0296376	Control avg is higher
E04	ChorionicGonadotropinHuman(HCG)	7.05879	7.51505	0.50664	0.97835	Control avg is higher		F10	ThyrotropinReleasingHormoneacetatesalt(TRH)	3.76897	5.16506	0.0159284	0.0305825	Control avg is higher
E05	ChorionicGonadotropinHuman(HCG)	5.46598	5.83707	0.665612	0.97835	Control avg is higher		G03	IFN-gamma	4.46738	6.11527	0.0185589	0.0349344	Control avg is higher
E06	ChorionicGonadotropinHuman(HCG)	5.13261	5.50234	0.620301	0.97835	Control avg is higher		D12	LuteinizingHormoneReleasingHormone(LH-RH)	2.94586	3.97264	0.0195165	0.0360305	Control avg is higher
E07	AdrenocorticotropicHormoneHuman(ACTH)	5.35804	5.55701	0.759843	0.97835	Control avg is higher		E10	AdrenocorticotropicHormoneHuman(ACTH)	4.22489	5.80783	0.0215619	0.0383323	Control avg is higher
E08	AdrenocorticotropicHormoneHuman(ACTH)	6.36537	6.58214	0.727952	0.97835	Control avg is higher		F08	ThyrotropinReleasingHormoneacetatesalt(TRH)	3.93097	5.34431	0.0215619	0.0383323	Control avg is higher
E09	AdrenocorticotropicHormoneHuman(ACTH)	5.33462	5.22115	0.775947	0.97835	Small deletion patients' avg is higher		F12	ThyrotropinReleasingHormoneacetatesalt(TRH)	2.3189	3.30038	0.0226529	0.0395396	Control avg is higher
E10	AdrenocorticotropicHormoneHuman(ACTH)	5.68604	5.80783	0.743843	0.97835	Control avg is higher		D09	LuteinizingHormoneReleasingHormone(LH-RH)	4.59004	6.23078	0.0237915	0.0407855	Control avg is higher
E11	AdrenocorticotropicHormoneHuman(ACTH)	5.29188	5.7116	0.50664	0.97835	Control avg is higher		H01	Adenosine	3.92859	4.7975	0.0249795	0.0420707	Control avg is higher
E12	AdrenocorticotropicHormoneHuman(ACTH)	4.24173	4.18048	0.94118	0.97835	Small deletion patients' avg is higher		F07	ThyrotropinReleasingHormoneacetatesalt(TRH)	3.1522	4.32159	0.0275102	0.0455341	Control avg is higher
F01	ThyrotropicHormone(TSH)	5.16095	5.27869	0.743843	0.97835	Control avg is higher		B08	Prolactin	4.3637	5.85405	0.0288564	0.0461703	Control avg is higher
F02	ThyrotropicHormone(TSH)	6.28308	6.74684	0.533998	0.97835	Control avg is higher		C10	Calcitriol(1a,25-dihydroxyvitaminD3)	3.84129	5.03847	0.0288564	0.0461703	Control avg is higher
F03	ThyrotropicHormone(TSH)	5.86715	6.43402	0.404995	0.97835	Control avg is higher		G04	IFN-gamma	3.52886	4.53789	0.0317198	0.0499197	Control avg is higher
F04	ThyrotropicHormone(TSH)	3.44871	3.88263	0.416992	0.97835	Control avg is higher		H02	Adenosine	3.02208	3.79943	0.0332406	0.0514693	Control avg is higher
F05	ThyrotropicHormone(TSH)	7.05697	7.57609	0.605502	0.97835	Control avg is higher		F09	ThyrotropinReleasingHormoneacetatesalt(TRH)	3.89048	5.19527	0.0348234	0.0530643	Control avg is higher
F06	ThyrotropicHormone(TSH)	5.18937	5.48444	0.635256	0.97835	Control avg is higher		A09	(Arg8)-Vasopressin	3.45887	4.5545	0.0399633	0.0599449	Control avg is higher
F07	ThyrotropinReleasingHormoneacetatesalt(TRH)	4.1389	4.32159	0.50664	0.97835	Control avg is higher		H03	Adenosine	3.80029	4.8823	0.0437362	0.0645951	Control avg is higher
F08	ThyrotropinReleasingHormoneacetatesalt(TRH)	5.20357	5.34431	0.696526	0.97835	Control avg is higher		C08	Calcitriol(1a,25-dihydroxyvitaminD3)	3.41273	4.40809	0.0545034	0.0792777	Control avg is higher
F09	ThyrotropinReleasingHormoneacetatesalt(TRH)	5.11601	5.19527	0.907692	0.97835	Control avg is higher		C09	Calcitriol(1a,25-dihydroxyvitaminD3)	3.12325	4.12614	0.0593899	0.085096	Control avg is higher
F10	ThyrotropinReleasingHormoneacetatesalt(TRH)	5.25758	5.16506	0.824813	0.97835	Small deletion patients' avg is higher		C11	Calcitriol(1a,25-dihydroxyvitaminD3)	4.39375	5.72188	0.0673969	0.0937696	Control avg is higher
F11	ThyrotropinReleasingHormoneacetatesalt(TRH)	4.29268	4.34621	0.907692	0.97835	Control avg is higher		G05	IFN-gamma	4.97518	6.52188	0.0673969	0.0937696	Control avg is higher
F12	ThyrotropinReleasingHormoneacetatesalt(TRH)	3.41181	3.30038	0.824813	0.97835	Small deletion patients' avg is higher		D11	LuteinizingHormoneReleasingHormone(LH-RH)	4.74725	6.03426	0.0702556	0.0949935	Control avg is higher
G01	IFN-gamma	4.53499	5.02047	0.359111	0.97835	Control avg is higher		F11	ThyrotropinReleasingHormoneacetatesalt(TRH)	3.42582	4.34621	0.0702556	0.0949935	Control avg is higher
G02	IFN-gamma	5.39319	5.61849	0.650362	0.97835	Control avg is higher		B12	Prolactin	3.27564	4.1755	0.0827014	0.110269	Control avg is higher
G03	IFN-gamma	5.58981	6.11527	0.441604	0.97835	Control avg is higher		C12	Calcitriol(1a,25-dihydroxyvitaminD3)	3.66689	4.49423	0.0987737	0.129894	Control avg is higher
G04	IFN-gamma	4.2443	4.53789	0.533998	0.97835	Control avg is higher		G02	IFN-gamma	4.57793	5.61849	0.108734	0.141061	Control avg is higher
G05	IFN-gamma	6.09698	6.52188	0.696526	0.97835	Control avg is higher		B09	Prolactin	4.4596	5.55646	0.121711	0.15579	Control avg is higher
G06	IFN-gamma	5.18227	5.3944	0.808438	0.97835	Control avg is higher		B10	Prolactin	2.95316	3.69225	0.135869	0.169395	Control avg is higher
G07	TNF-alpha	5.53572	5.88518	0.775947	0.97835	Control avg is higher		G11	TNF-alpha	3.65762	4.44201	0.135869	0.169395	Control avg is higher
G08	TNF-alpha	5.37545	6.07773	0.547951	0.97835	Control avg is higher		H05	Adenosine	3.63579	4.41227	0.151265	0.186173	Control avg is higher
G09	TNF-alpha	4.80702	4.80193	0.957967	0.97835	Small deletion patients' avg is higher		G06	IFN-gamma	4.48943	5.3944	0.156683	0.190399	Control avg is higher
G10	TNF-alpha	5.84091	5.80501	0.891005	0.97835	Small deletion patients' avg is higher		H04	Adenosine	4.34137	5.23984	0.173818	0.208581	Control avg is higher
G11	TNF-alpha	4.34595	4.44201	0.94118	0.97835	Control avg is higher		G08	TNF-alpha	5.07124	6.07773	0.185995	0.220438	Control avg is higher
G12	TNF-alpha	4.86646	4.63735	0.605502	0.97835	Small deletion patients' avg is higher		G07	TNF-alpha	5.02642	5.88518	0.21222	0.248453	Control avg is higher
H01	Adenosine	4.5178	4.7975	0.404995	0.97835	Control avg is higher		B11	Prolactin	4.26725	5.16338	0.248628	0.284146	Control avg is higher
H02	Adenosine	3.82947	3.79943	0.957967	0.97835	Small deletion patients' avg is higher		H12	Gly-His-Lysacetatesalt	3.6538	4.26799	0.248628	0.284146	Control avg is higher
H03	Adenosine	4.54809	4.8823	0.429195	0.97835	Control avg is higher		G10	TNF-alpha	4.77705	5.80501	0.256405	0.289587	Control avg is higher
H04	Adenosine	4.94693	5.23984	0.605502	0.97835	Control avg is higher		A11	(Arg8)-Vasopressin	3.42019	4.00765	0.315564	0.348209	Control avg is higher
H05	Adenosine	4.25655	4.41227	0.696526	0.97835	Control avg is higher		H06	Adenosine	4.79843	5.58962	0.315564	0.348209	Control avg is higher
H06	Adenosine	5.32251	5.58962	0.681002	0.97835	Control avg is higher		H10	Gly-His-Lysacetatesalt	3.76399	4.18858	0.343467	0.374691	Control avg is higher
H07	Gly-His-Lysacetatesalt	4.65322	4.84932	0.681002	0.97835	Control avg is higher		G12	TNF-alpha	4.32671	4.63735	0.393359	0.424297	Control avg is higher
H08	Gly-His-Lysacetatesalt	4.07028	3.94522	0.808438	0.97835	Small deletion patients' avg is higher		G09	TNF-alpha	4.36455	4.80193	0.414487	0.442119	Control avg is higher
H09	Gly-His-Lysacetatesalt	4.79035	4.43365	0.627755	0.97835	Small deletion patients' avg is higher		H07	Gly-His-Lysacetatesalt	4.52746	4.84932	0.447406	0.471989	Control avg is higher
H10	Gly-His-Lysacetatesalt	4.38113	4.18858	0.957967	0.97835	Small deletion patients' avg is higher		H08	Gly-His-Lysacetatesalt	3.5993	3.94522	0.505443	0.527419	Control avg is higher
H11	Gly-His-Lysacetatesalt	4.34967	4.0339	0.743843	0.97835	Small deletion patients' avg is higher		A10	(Arg8)-Vasopressin	3.67501	4.18535	0.529721	0.546809	Control avg is higher
H12	Gly-His-Lysacetatesalt	4.85806	4.26799	0.241984	0.97835	Small deletion patients' avg is higher		A12	(Arg8)-Vasopressin	3.76472	4.1153	0.60594	0.618833	Control avg is higher
D11	LuteinizingHormoneReleasingHormone(LH-RH)	6.16393	6.03426	0.974773	0.985034	Small deletion patients' avg is higher		H09	Gly-His-Lysacetatesalt	4.37823	4.43365	0.714512	0.722033	Control avg is higher
C09	Calcitriol(1a,25-dihydroxyvitaminD3)	4.23621	4.12614	0.99159	0.99159	Small deletion patients' avg is higher		H11	Gly-His-Lysacetatesalt	3.90631	4.0339	1	1	Control avg is higher

## Sheet: TRP
PM-Trp (Energy sources)
well	CMS	mean_small_deletion_p	mean_cntrl	p.value	adj_p	Note		well	CMS	mean_large_deletion_p	mean_cntrl	p.value	adj_p	Note
A1	a-D-Glucose	3.44305	4.95193	0.000772247	0.00617797	Control avg is higher		A1	a-D-Glucose	2.69523	4.95193	9.97186e-06	7.97749e-05	Control avg is higher
B1	Empty	0.486366	0.479177	0.665612	0.665612	Small deletion patients' avg is higher		B1	Empty	0.418507	0.479177	0.241017	0.241017	Control avg is higher
C1	L-Tryptophan	0.853507	1.27243	0.0440813	0.0881626	Control avg is higher		C1	L-Tryptophan	0.7672	1.27243	0.00937292	0.0167174	Control avg is higher
D1	Trp-Gly	1.01828	1.48429	0.0323703	0.0881626	Control avg is higher		D1	Trp-Gly	0.867578	1.48429	0.00260521	0.0104209	Control avg is higher
E1	Trp-Lys	0.815282	1.20704	0.0419114	0.0881626	Control avg is higher		E1	Trp-Lys	0.720709	1.20704	0.00634385	0.0167174	Control avg is higher
F1	Trp-Ala	1.01107	1.40894	0.0783511	0.104468	Control avg is higher		F1	Trp-Ala	0.911453	1.40894	0.0104484	0.0167174	Control avg is higher
G1	Trp-Arg	0.79655	1.02541	0.306559	0.350353	Control avg is higher		G1	Trp-Arg	0.78311	1.02541	0.233572	0.241017	Control avg is higher
H1	Trp-Leu	0.894866	1.16164	0.0748444	0.104468	Control avg is higher		H1	Trp-Leu	0.830631	1.16164	0.020517	0.027356	Control avg is higher
